# Supplementary material for: Immunogenicity and Risk Factors Associated With Poor Humoral Immune Response of SARS-CoV-2 Vaccines in Recipients of Solid Organ Transplant: A Systematic Review and Meta-Analysis
Source: PubMed Central journal article supplement (PMC9006106; doi:10.1001/jamanetworkopen.2022.6822), 2022-04-12
Supplement: jamanetwopen-e226822-s001.pdf [file jamanetwopen-e226822-s001.pdf]

## Supplemental Online Content

Manothummetha K, Chuleerarux N, Sanguankeo A, et al. Immunogenicity and risk factors associated with poor humoral immune response of SARS-CoV-2 vaccines in recipients of solid organ transplant: a systematic review and meta-analysis. *JAMA Netw Open*. 2022;5(4):e226822. doi:10.1001/jamanetworkopen.2022.6822

**eMethods.** Search Strategies

**eTable 1.** Newcastle-Ottawa Quality Assessment Scale of Included Studies in Meta-Analysis

**eTable 2.** Study Characteristics

**eTable 3.** Grading of Recommendation Assessment, Development and Evaluation (GRADE) for Potential Factors Associated With Diminished Humoral Immune Response

**eTable 4.** Humoral Immune Response Rates After 2 Doses of mRNA Vaccines by the Different Testing

**eTable 5.** Humoral Immune Response by the COVID-19 Vaccine Types and Doses

**eTable 6.** Participants and the Effect Estimates of Potential Risk Factors for Diminished Humoral Immune Response in Each Study

**eTable 7.** Continuous Data of Potential Risk Factors for Diminished Humoral Immune Response

**eFigure 1.** Forest Plots of Studied Risk Factors

**eFigure 2.** Sensitivity Analysis of Studied Risk Factors

**eFigure 3.** Publication Bias of Studied Risk Factors

**eFigure 4.** Funnel Plots and Adjusted Effect Estimates Accounting for Publication Bias

**eReferences.**

This supplemental material has been provided by the authors to give readers additional information about their work.

## eMethods. Search Strategies

### OVID Medline

1. exp COVID-19/ or (COVID-19 or SARS-CoV-2 or 2019 Novel Coronavirus or 2019-nCoV).mp.
2. (Ad26\*COV\*S or Janssen or JNJ-78436735 or Ad26COVS1 or VAC31518).mp.
3. (AZD1222 or ChAdOx1 nCoV-19 or AZ or astrazeneca or ChAdOx1-S or AZD2816).mp.
4. (BNT162b2 or Pfizer or biontech or Comirnaty or Tozinameran).mp.
5. (Coronavac or Sinovac or PiCoVacc).mp.
6. (mRNA-1273 or Moderna).mp.
7. ((WIV04 and HB02) or Sinopharm).mp.
8. exp Vaccination/ or exp Vaccines/ or vaccin\*.mp.
9. exp Immunization/ or immuni\*ation.mp.
10. 8 or 9
11. 1 and 10
12. exp COVID-19 Vaccines/ or ((COVID-19 or SARS-CoV-2 or 2019 Novel Coronavirus or 2019-nCoV) adj2 Vaccin\*).tw.
13. 2 or 3 or 4 or 5 or 6 or 7 or 11 or 12
14. exp Organ Transplantation/ or organ transplant\*.mp.
15. heart\*.mp. or exp Heart/
16. (cardiac or cardio\*).mp.
17. lung\*.mp. or exp Lung/
18. pulmonary.mp.
19. exp Kidney/ or kidney\*.mp.
20. renal.mp.
21. liver.mp. or exp Liver/
22. hepatic.mp.
23. pancrea\*.mp. or exp Pancreas/
24. intestin\*.mp. or exp Intestines/ or exp Intestine, Small/
25. 15 or 16 or 17 or 18 or 19 or 20 or 21 or 22 or 23 or 24
26. transplant\*.mp. or exp Transplant Recipients/
27. 25 and 26
28. exp Heart Transplantation/ or heart transplant\*.mp.
29. exp Lung Transplantation/ or lung transplant\*.mp.
30. exp Kidney Transplantation/ or kidney transplant\*.mp.
31. exp Liver Transplantation/ or liver transplant\*.mp.
32. exp Pancreas Transplantation/ or pancrea\* transplant\*.mp.
33. Intestin\* transplant\*.mp.
34. transplant\*.mp.
35. 14 or 27 or 28 or 29 or 30 or 31 or 32 or 33 or 34
36. 13 and 35

Embase:

1. 'sars-cov-2 vaccine'/exp OR 'sars-cov-2 vaccine'
2. 'ad26.cov2.s vaccine'/exp OR 'ad26.cov2.s vaccine'
3. 'tozinameran'/exp OR 'tozinameran'
4. 'chadox1 ncov 19'/exp OR 'chadox1 ncov 19'
5. 'picovacc vaccine'/exp OR 'picovacc vaccine'
6. 'mrna-1273 vaccine'/exp OR 'mrna-1273 vaccine'
7. 'bbibp corv vaccine'/exp OR 'bbibp corv vaccine'
8. 'coronavirus disease 2019'/exp OR 'coronavirus disease 2019'
9. 'vaccin\*' OR 'vaccine'/exp OR 'vaccine' OR 'vaccination'/exp OR 'vaccination'
10. 'immunization'/exp OR 'immunization'
11. #9 OR #10
12. #8 AND #11
13. #1 OR #2 OR #3 OR #4 OR #5 OR #6 OR #7 OR #12
14. 'organ transplant\*' OR 'organ transplantation'/exp OR 'organ transplantation'
15. 'heart'/exp OR 'heart' OR 'cardio\*' OR 'cardiac'
16. 'lung'/exp OR 'lung' OR 'pulmonary'
17. 'kidney'/exp OR 'kidney' OR 'renal'/exp OR 'renal'
18. 'liver'/exp OR 'liver' OR 'hepatic'
19. 'pancreas'/exp OR 'pancreas' OR 'pancrea\*'
20. 'intestine'/exp OR 'intestine' OR 'intestin\*'
21. 'transplant'/exp OR 'transplant' OR 'transplantation'/exp OR 'transplantation' OR 'transplant\*' OR 'graft recipient'/exp OR 'graft recipient' OR 'transplant\* recipient\*'
22. #15 OR #16 OR #17 OR #18 OR #19 OR #20
23. #21 AND #22
24. ('organ'/exp OR organ OR 'heart'/exp OR heart OR 'lung'/exp OR lung OR 'renal'/exp OR renal OR 'liver'/exp OR liver OR intestinal) AND transplant\*
25. #14 OR #23 OR #24
26. 'heart graft'/exp OR 'heart graft' OR 'heart transplantation'/exp OR 'heart transplantation' OR 'heart transplant\*'
27. 'lung transplantation'/exp OR 'lung transplantation' OR 'lung transplant\*'
28. 'kidney graft'/exp OR 'kidney graft' OR 'kidney transplantation'/exp OR 'kidney transplantation' OR 'kidney transplant\*'
29. 'liver graft'/exp OR 'liver graft' OR 'liver transplantation'/exp OR 'liver transplantation' OR 'liver transplant\*'
30. 'pancreas transplantation'/exp OR 'pancreas transplantation' OR 'pancrea\* transplant\*'
31. 'intestine graft'/exp OR 'intestine graft' OR 'intestine transplantation'/exp OR 'intestine transplantation' OR 'intestin\* transplant\*'
32. #25 OR #26 OR #27 OR #28 OR #29 OR #30 OR #31 OR 'transplant'/exp OR 'transplant\*'
33. #13 AND #32

## ISI Web of Science

1. ALL=(COVID-19 OR SARS-CoV-2 OR 2019 Novel Coronavirus OR 2019\*nCoV)
2. ALL=(vaccin\* or immuni\*ation)
3. 1 AND 2
4. ALL=(Ad26\*COV\*S OR JNJ\*78436735 OR Ad26COVS1 OR VAC31518)
5. ALL=(AZD1222 or ChAdOx1 nCoV\*19 or ChAdOx1\*S or AZD2816)
6. ALL=(BNT162b2 or biontech or Comirnaty or Tozinameran)
7. ALL=(Coronavac or Sinovac or PiCoVacc)
8. ALL=(mRNA-1273 or Moderna)
9. ALL=(WIV04 and HB02) or Sinopharm)
10. 3 OR 4 OR 5 OR 6 OR 7 OR 8 OR 9
11. 10 AND ALL=(transplant\*)

## Cochrane Library

1. MeSH descriptor: [COVID-19] explode all trees
2. COVID-19 OR SARS-CoV-2 OR 2019 Novel Coronavirus OR 2019\*nCoV
3. MeSH descriptor: [Vaccines] explode all trees
4. Vaccin\* OR immuni\*ation
5. (#1 OR #2) AND (#3 OR #4)
6. MeSH descriptor: [COVID-19 Vaccines] explode all trees
7. Ad26\*COV\*S OR Janssen OR JNJ\*78436735 OR Ad26COVS1 OR VAC31518
8. AZD1222 or ChAdOx1 nCoV\*19 or AZ or astrazeneca or ChAdOx1\*S or AZD2816
9. BNT162b2 or Pfizer or biontech or Comirnaty or Tozinameran
10. Coronavac or Sinovac or PiCoVacc
11. mRNA-1273 or Moderna
12. (WIV04 and HB02) or Sinopharm
13. #5 or #6 or #7 or #8 or #9 or #10 or #11 or #12
14. MeSH descriptor: [Heart] explode all trees
15. cardiac or cardio\* or heart
16. MeSH descriptor: [Lung] explode all trees
17. lung\* or pulmonary
18. MeSH descriptor: [Kidney] explode all trees
19. kidney\* or renal
20. MeSH descriptor: [Liver] explode all trees
21. liver or hepatic
22. MeSH descriptor: [Pancreas] explode all trees
23. pancrea\*
24. MeSH descriptor: [Intestines] explode all trees
25. intestin\*
26. #14 or #15 or #16 or #17 or #18 or #19 or #20 or #21 or #22 or #23 or #24 or #25
27. MeSH descriptor: [Transplantation] explode all trees
28. MeSH descriptor: [Transplant Recipients] explode all trees
29. transplant\*
30. #27 or #28 or #29
31. #26 and #30

32. MeSH descriptor: [Heart Transplantation] explode all trees
33. MeSH descriptor: [Lung Transplantation] explode all trees
34. MeSH descriptor: [Kidney Transplantation] explode all trees
35. MeSH descriptor: [Liver Transplantation] explode all trees
36. MeSH descriptor: [Pancreas Transplantation] explode all trees
37. intestin\* transplant\*
38. #32 or #33 or #34 or #35 or #36 or #37
39. #31 or #38
40. #13 AND #39

#### Clinicaltrial.gov

(heart OR cardiac OR cardio OR lung OR pulmonary OR liver OR hepatic OR renal OR kidney OR intestin OR pancrea) AND transplant | COVID-19 vaccin OR BNT162b2 OR Pfizer OR Tozinameran OR Ad26.COV.S OR Janssen OR JNJ-78436735 OR Ad26COVS1 OR VAC31518 OR AZD1222 OR ChAdOx1 nCoV-19 OR AZ OR astrazeneca OR ChAdOx1-S OR AZD2816 OR mRNA-1273 OR CoronaVac OR Sinopharm

**eTable 1.** Newcastle-Ottawa Quality Assessment Scale of Included Studies in Meta-Analysis

| Study/Year                                             | Selection          |                                     |               |                                    | Comparability               | Outcome               |                    |                    | Total score |
|--------------------------------------------------------|--------------------|-------------------------------------|---------------|------------------------------------|-----------------------------|-----------------------|--------------------|--------------------|-------------|
|                                                        | Representativeness | Selection of the non-exposed cohort | Ascertainment | Endpoint does not present at start | Comparability (Confounding) | Assessment of outcome | Follow-up duration | Adequacy follow-up |             |
| Alejo 2021 <sup>1</sup>                                | *                  | *                                   | *             | *                                  | **                          | *                     | *                  | *                  | 9           |
| Azzi 2021 <sup>2</sup>                                 | *                  | *                                   |               | *                                  | **                          | *                     | *                  | *                  | 8           |
| Ben Zadok 2021 <sup>3</sup>                            | *                  | *                                   | *             | *                                  | **                          | *                     | *                  | *                  | 9           |
| Benotmane 2021 (1 dose Moderna) <sup>4</sup>           | *                  | *                                   |               | *                                  |                             | *                     | *                  | *                  | 6           |
| Benotmane 2021 (2 doses Moderna) <sup>5</sup>          | *                  | *                                   |               | *                                  |                             | *                     | *                  | *                  | 6           |
| Benotmane 2021 (3 doses) <sup>6</sup>                  | *                  | *                                   |               | *                                  |                             | *                     | *                  | *                  | 6           |
| Bergman 2021 <sup>7</sup>                              | *                  | *                                   |               | *                                  | *                           | *                     | *                  | *                  | 7           |
| Bertrand 2021 <sup>8</sup>                             | *                  | *                                   | *             | *                                  | **                          | *                     | *                  | *                  | 9           |
| Bertrand 2021 <sup>9</sup>                             | *                  | *                                   | *             | *                                  | **                          | *                     | *                  | *                  | 9           |
| Bertrand 2021 (3 doses) <sup>10</sup>                  | *                  | *                                   |               | *                                  | **                          | *                     | *                  | *                  | 8           |
| Boyarsky 2021 (1 dose of mRNA vaccines) <sup>11</sup>  |                    | *                                   | *             | *                                  | **                          | *                     | *                  | *                  | 8           |
| Boyarsky 2021 (2 doses of mRNA vaccines) <sup>12</sup> |                    | *                                   | *             | *                                  | **                          | *                     | *                  | *                  | 8           |
| Boyarsky 2021 (Janssen) <sup>13</sup>                  | *                  | *                                   | *             | *                                  | **                          | *                     | *                  | *                  | 9           |
| Cao 2021 <sup>14</sup>                                 | *                  | *                                   | *             | *                                  | **                          | *                     | *                  | *                  | 9           |
| Chavarot 2021 <sup>15</sup>                            | *                  | *                                   | *             | *                                  | **                          | *                     | *                  | *                  | 9           |
| Chavarot 2021 (3 doses) <sup>16</sup>                  | *                  | *                                   | *             | *                                  | **                          | *                     | *                  | *                  | 9           |

|                                        |   |   |   |   |    |   |   |   |   |
|----------------------------------------|---|---|---|---|----|---|---|---|---|
| Cholankeril 2021                       | * |   | * | * | *  | * | * | * | 7 |
| Crespo 2021 <sup>17</sup>              | * | * | * | * |    | * | * | * | 7 |
| Cucchiari 2021 <sup>18</sup>           | * | * | * | * |    | * | * | * | 7 |
| D'offizi 2021 <sup>19</sup>            | * |   |   | * | *  | * | * | * | 6 |
| Danthu 2021 <sup>20</sup>              | * | * | * | * | ** | * | * | * | 9 |
| Davidov 2021 <sup>21</sup>             | * | * | * | * | *  | * | * | * | 8 |
| Debska-slizien 2021 <sup>22</sup>      | * | * | * | * | *  | * | * | * | 8 |
| Del Bello 2021 <sup>23</sup>           | * | * |   | * | ** | * | * | * | 8 |
| Ducloux 2021 <sup>24</sup>             | * | * | * | * |    | * | * | * | 7 |
| Firket 2021 <sup>25</sup>              | * | * |   | * | ** | * | * | * | 8 |
| Georgery 2021 (1st dose) <sup>26</sup> | * | * | * | * | ** | * | * | * | 9 |
| Georgery 2021 (2nd dose) <sup>27</sup> | * | * | * | * | ** | * | * | * | 9 |
| Grupper 2021 <sup>28</sup>             | * | * | * | * | *  | * | * |   | 7 |
| Guarino 2021 <sup>29</sup>             | * |   | * | * |    | * | * |   | 5 |
| Hall 2021 <sup>30</sup>                | * |   | * | * |    | * | * | * | 6 |
| Hall 2021 (3 doses) <sup>31</sup>      | * | * | * | * | ** | * | * | * | 9 |
| Haskin 2021 <sup>32</sup>              | * | * | * | * | ** | * | * |   | 8 |
| Havlin 2021 <sup>33</sup>              | * |   | * | * | ** | * | * | * | 8 |
| Havlin 3031 (3 doses) <sup>34</sup>    |   |   |   | * | *  | * | * | * | 5 |
| Herrera 2021 <sup>35</sup>             | * |   | * | * |    | * | * | * | 6 |
| Hod 2021 <sup>36</sup>                 | * |   | * | * | *  | * | * |   | 6 |
| Hoffman 2021 <sup>37</sup>             | * |   |   | * | *  | * | * | * | 6 |
| Holden 2021 <sup>38</sup>              | * |   | * | * |    | * | * |   | 5 |
| Kamar 2021 <sup>39</sup>               | * |   | * | * |    | * | * |   | 5 |
| Kamar 2021 (4 doses) <sup>40</sup>     |   |   |   | * | *  | * | * | * | 5 |
| Kantauskaite 2021 <sup>41</sup>        | * |   | * | * |    | * | * |   | 5 |

|                                                                |   |   |   |   |    |   |   |   |   |
|----------------------------------------------------------------|---|---|---|---|----|---|---|---|---|
| Korth 2021 <sup>42</sup>                                       | * |   | * | * | *  | * | * |   | 6 |
| Kumar 2021 <sup>43</sup>                                       | * | * |   | * | *  | * | * | * | 7 |
| Marinaki 2021 <sup>44</sup>                                    | * |   | * | * |    | * | * |   | 5 |
| Marion 2021 <sup>45</sup>                                      | * |   | * | * |    | * | * |   | 5 |
| Massa 2021 <sup>46</sup>                                       | * |   |   |   | *  | * | * | * | 5 |
| Masset 2021 <sup>47</sup>                                      | * |   | * | * |    | * | * |   | 5 |
| Masset 2021 (heterozygous vs homozygous vaccine) <sup>48</sup> |   |   |   |   |    |   |   |   |   |
| Mazzola 2021 <sup>49</sup>                                     | * |   | * | * |    | * | * |   | 5 |
| Medina-Pestana 2021 <sup>50</sup>                              | * |   | * | * |    | * | * |   | 5 |
| Middleton 2021 <sup>51</sup>                                   | * |   | * | * |    | * | * |   | 5 |
| Midtvedth 2021 <sup>52</sup>                                   | * |   | * | * |    | * | * |   | 5 |
| Miele 2021 <sup>53</sup>                                       | * |   | * | * |    | * | * |   | 5 |
| Narasimhan 2021 <sup>54</sup>                                  | * |   | * | * |    | * | * |   | 5 |
| Noble 2021 <sup>55</sup>                                       | * | * | * | * | ** | * | * |   | 8 |
| Pedersen 2021 <sup>56</sup>                                    | * | * |   | * |    | * | * | * | 6 |
| Peled 2021 <sup>57</sup>                                       | * |   |   | * |    | * | * | * | 5 |
| Peled 2021 (3 doses) <sup>58</sup>                             | * |   | * | * |    | * | * | * | 6 |
| Predecki 2021 <sup>59</sup>                                    | * | * | * | * |    | * | * | * | 7 |
| Quiroga 2021 <sup>60</sup>                                     | * |   | * |   | *  | * | * | * | 6 |
| Rabinowich 2021 <sup>61</sup>                                  | * | * | * | * | *  | * | * | * | 8 |
| Rashidi-Alavijeh 2021 <sup>62</sup>                            | * | * | * | * | *  | * | * | * | 8 |
| Rahav 2021 <sup>63</sup>                                       | * | * |   | * | *  | * | * | * | 7 |
| Rincon-Arevalo 2021 <sup>64</sup>                              | * | * | * | * |    | * | * | * | 7 |
| Rozen-Zvi 2021 <sup>65</sup>                                   | * |   | * | * |    | * | * | * | 6 |
| Ruether 2021 <sup>66</sup>                                     | * | * | * | * | *  | * | * | * | 8 |



|                                                    |   |   |   |   |   |   |   |   |   |
|----------------------------------------------------|---|---|---|---|---|---|---|---|---|
| Russo 2021 <sup>67</sup>                           | * |   | * | * |   | * | * | * | 6 |
| Sadioğlu 2021 <sup>68</sup>                        | * |   | * | * |   | * | * | * | 6 |
| Sanders 2021 <sup>69</sup>                         | * | * |   | * | * | * | * | * | 7 |
| Sattler 2021 <sup>70</sup>                         | * | * | * | * | * | * | * | * | 8 |
| Schmidt 2021 <sup>71</sup>                         | * | * | * | * | * | * | * | * | 8 |
| Schramm 2021 <sup>72</sup>                         | * | * | * | * |   | * | * | * | 7 |
| Schrezenmeier 2021 <sup>73</sup>                   | * |   |   |   | * | * | * | * | 5 |
| Shostak 2021 <sup>74</sup>                         | * |   | * | * |   | * | * | * | 6 |
| Stumpf 2021 (Sub-analysis of DIAVAC) <sup>75</sup> | * |   |   | * |   | * | * | * | 5 |
| Stumpf 2021 <sup>76</sup>                          | * | * | * | * |   | * | * | * | 7 |
| Thuluvath 2021 <sup>77</sup>                       | * | * |   | * |   | * | * | * | 7 |
| Villanego 2021 <sup>78</sup>                       | * |   | * | * |   | * | * | * | 6 |
| Werbel 2021 <sup>79</sup>                          | * |   |   | * |   | * | * | * | 5 |
| Westhoff 2021 <sup>80</sup>                        | * |   | * | * |   | * | * | * | 6 |
| Wijtvliet 2021 <sup>81</sup>                       | * |   |   | * | * | * | * | * | 6 |
| Yi 2021 <sup>82</sup>                              | * | * | * | * |   | * | * | * | 7 |

**eTable 2.** Study Characteristics

| Study                                 | Vaccine                             | Country | Type of organ transplantati on       | Study design  | Number of patients for analysis | Dose (time to antibody testing after the last dose unless otherwise stated)    | Antibody measurement | Methods                                                                           | Responders/total (%)                                                                                             |
|---------------------------------------|-------------------------------------|---------|--------------------------------------|---------------|---------------------------------|--------------------------------------------------------------------------------|----------------------|-----------------------------------------------------------------------------------|------------------------------------------------------------------------------------------------------------------|
| Alejo 2021 <sup>1</sup>               | BNT162b2 or mRNA-1273               | USA     | Kidney<br>Liver<br>Heart<br>Pancreas | Prospective   | 18                              | 4 doses<br>(2-6 weeks)                                                         | Anti-Spike Ab        | Elecsys anti-SARS-CoV-2 (Roche) or EUROIMMUN SARS-CoV-2 ELISA assay               | 15/18 (83.3)<br>Pre-dose 4, 6 with negative titers, 2 with low-positive titers, and 10 with high positive titers |
| Azzi 2021 <sup>2</sup>                | BNT162b2 or mRNA-1273 or Ad26.CoV.2 | USA     | Kidney                               | Prospective   | 76                              | 2 doses for BNT162b2 and mRNA-1273, 1 dose for Ad26.CoV2.S<br>(median 28 days) | Anti-spike Ab        | VITROS Immunodiagnostic Products Anti-SARS-CoV-2 IgG (Ortho-Clinical Diagnostics) | 24/76 (31.6)                                                                                                     |
| Ben Zadok 2021 <sup>3</sup>           | BNT162b2                            | Israel  | Heart                                | Prospective   | 37                              | 1 dose<br>(21-26 days)<br>2 doses<br>(35-40 days)                              | Anti-spike Ab        | The ARCHITECT SARS-CoV-2 IgG II Quant assay (Abbott)                              | 6/39 (15.4)<br>18/37 (48.7)                                                                                      |
| Benotmane 2021 (1 dose) <sup>4</sup>  | mRNA-1273                           | France  | Kidney                               | Prospective   | 241                             | 1 dose<br>(28 days)                                                            | Anti-spike Ab        | The ARCHITECT SARS-CoV-2 IgG II Quant assay (Abbott)                              | 26/241 (10.8)                                                                                                    |
| Benotmane 2021 (2 doses) <sup>5</sup> | mRNA-1273                           | France  | Kidney                               | Prospective   | 204                             | 2 doses (28 days)                                                              | Anti-spike Ab        | The ARCHITECT SARS-CoV-2 IgG II Quant assay (Abbott)                              | 98/204 (48)                                                                                                      |
| Benotmane 2021 (3 doses) <sup>6</sup> | mRNA-1273                           | France  | Kidney                               | Prospective   | 159                             | 3 doses<br>(median 28 days)                                                    | Anti-spike Ab        | The ARCHITECT SARS-CoV-2 IgG II Quant assay (Abbott)                              | 78/159 (49.1)                                                                                                    |
| Bergman 2021 <sup>7</sup>             | BNT162b2                            | Sweden  | Kidney,<br>Kidney-pancreas,<br>Liver | Prospective   | 83                              | 2 doses<br>(14 days)                                                           | Anti-spike Ab        | Elecsys anti-SARS-CoV-2 (Roche)                                                   | 36/83 (43.4)                                                                                                     |
| Bertrand 2021 <sup>8</sup>            | BNT162b2                            | France  | Kidney                               | Retrospective | 45                              | 1 dose<br>(3 weeks)<br><br>2 doses<br>(4 weeks)                                | Anti-spike Ab        | The ARCHITECT SARS-CoV-2 IgG II Quant assay (Abbott)                              | 1/45 (2.2)<br><br>8/45 (17.8)                                                                                    |

|                                                           |                       |        |                                                       |               |     |                                                     |               |                                                                                                                                   |                                          |
|-----------------------------------------------------------|-----------------------|--------|-------------------------------------------------------|---------------|-----|-----------------------------------------------------|---------------|-----------------------------------------------------------------------------------------------------------------------------------|------------------------------------------|
| Bertrand 2021 <sup>9</sup>                                | BNT162b2              | France | Kidney                                                | Retrospective | 235 | 2 doses<br>(median 34.6 days)                       | Anti-spike Ab | The ARCHITECT SARS-CoV-2 IgG II Quant assay (Abbott)                                                                              | 65/235 (27.7)                            |
| Bertrand 2021<br>(3 doses) <sup>10</sup>                  | BNT162b2              | France | Kidney                                                | Retrospective | 80  | 2 doses (median 34.5 days)<br><br>3 doses (1 month) | Anti-spike Ab | The ARCHITECT SARS-CoV-2 IgG II Quant assay (Abbott)                                                                              | 30/80 (37.5)<br><br>49/80 (61.2)         |
| Boyarsky 2021<br>(1 dose of mRNA vaccines) <sup>11</sup>  | BNT162b2 or mRNA-1273 | USA    | Kidney<br>Heart<br>Lung<br>Liver<br>Pancreas<br>Other | Prospective   | 436 | 1 dose<br>(Median 21 days)                          | Anti-spike Ab | Elecsys anti-SARS-CoV-2 (Roche) or EUROIMMUN SARS-CoV-2 ELISA assay                                                               | 76/436 (17.4)                            |
| Boyarsky 2021<br>(2 doses of mRNA vaccines) <sup>12</sup> | BNT162b2 or mRNA-1273 | USA    | Kidney<br>Heart<br>Lung<br>Liver<br>Pancreas<br>Other | Prospective   | 658 | 2 doses<br>(Median 29 days)                         | Anti-spike Ab | Elecsys anti-SARS-CoV-2 (Roche) or EUROIMMUN SARS-CoV-2 ELISA assays                                                              | 357/658 (54.3)                           |
| Boyarsky 2021<br>(Janssen) <sup>13</sup>                  | Ad26.CoV.2            | USA    | Kidney<br>Liver<br>Heart<br>Lung                      | Prospective   | 12  | 1 dose<br>(median 33 days)                          | Anti-spike Ab | Elecsys anti-SARS-CoV-2 (Roche)                                                                                                   | 2/12 (16.7)                              |
| Cao 2021 <sup>14</sup>                                    | BNT162b2 or mRNA-1273 | USA    | Lung<br>Kidney<br>Heart<br>Liver<br>Heart-lung        | Retrospective | 37  | 2 doses<br>(not reported)                           | Anti-spike Ab | The Alinity I SARS-CoV-2 IgG II assay (Abbott)                                                                                    | 15/37 (40.5)                             |
| Chavarot 2021 <sup>15</sup>                               | BNT162b2              | France | Kidney (all were treated with belatacept)             | Prospective   | 101 | 1 dose<br>(28 days)<br><br>2 doses<br>(1 month)     | Anti-spike Ab | SARS-CoV-2 IgG II Quant assay (Abbott) or total SARS-CoV-2 antibodies ELISA assay (Beijing Wantai Biological Pharmacy Enterprise) | 2/101 (2)<br><br>2/35 (5.7)              |
| Chavarot 2021<br>(3 doses) <sup>16</sup>                  | BNT162b2              | France | Kidney (all were treated with belatacept)             | Prospective   | 62  | 3 doses<br>(median 28 days)                         | Anti-spike Ab | SARS-CoV-2 IgG II Quant assay (Abbott)                                                                                            | Only seronegative after 2 doses 4/62 (6) |
| Cholankeril 2021                                          | BNT162b2              | USA    | Liver                                                 | Prospective   | 69  | 2 doses<br>(median (IQR) 81 (72-90) days)           | Anti-spike Ab | Quest Diagnostics                                                                                                                 | 33/69 (47.8)                             |
| Crespo 2021 <sup>17</sup>                                 | mRNA-1273             | Spain  | Kidney                                                | Prospective   | 90  | 2 doses (28 days)                                   | Anti-spike Ab | LIAISON SARS-CoV-2 TrimericS IgG (DiaSorin)                                                                                       | 57/90 (63.3)                             |

|                                                    |                       |         |                                                          |               |     |                                                                                                          |                                      |                                                                                                   |                                                          |
|----------------------------------------------------|-----------------------|---------|----------------------------------------------------------|---------------|-----|----------------------------------------------------------------------------------------------------------|--------------------------------------|---------------------------------------------------------------------------------------------------|----------------------------------------------------------|
| Cucchiari 2021 <sup>18</sup>                       | mRNA-1273             | Spain   | Kidney<br>Kidney-pancreas                                | Prospective   | 148 | 2 doses<br>(2 weeks)                                                                                     | Anti-spike Ab                        | Luminex                                                                                           | 35/117 (29.9)                                            |
| D'offizi 2021 <sup>19</sup>                        | BNT162b2 or mRNA-1273 | Italy   | Liver                                                    | Prospective   | 61  | 2 doses<br>(2 weeks)                                                                                     | Anti-spike Ab<br><br>Neutralizing Ab | The ARCHITECT SARS-CoV-2 IgG II Quant assay (Abbott)<br><br>SARS-CoV2/Human/ITA/PAVIA10734/2020   | 47/61 (77)<br><br>29/61 (47.5)                           |
| Danthu 2021 <sup>20</sup>                          | BNT162b2              | France  | Kidney                                                   | Prospective   | 74  | 2 doses (36 days after the second dose)                                                                  | Anti-spike Ab                        | LIAISON SARS-CoV-2 TrimericS IgG (DiaSorin)                                                       | 3/74 (4.1)                                               |
| Davidov 2021 <sup>21</sup>                         | BNT162b2              | Israel  | Liver                                                    | Prospective   | 76  | 2 doses<br>(median (IQR) 36 (17-52) days)                                                                | Anti-spike Ab                        | Not reported                                                                                      | 55/76 (72.4)                                             |
| Debska-slizien 2021 <sup>22</sup>                  | BNT162b2 or mRNA-1273 | Poland  | Kidney                                                   | Prospective   | 142 | 2 (14-21 days)                                                                                           | Anti-spike                           | LIAISON SARS-CoV-2 TrimericS IgG (DiaSorin)                                                       | 73/142 (51.4)                                            |
| Del Bello 2021 <sup>23</sup>                       | BNT162b2              | France  | Kidney<br>Liver<br>Heart<br>Lung<br>Pancreas<br>Combined | Retrospective | 396 | 1 dose<br>(before the second dose)<br><br>2 doses<br>(before the third dose)<br><br>3 doses<br>(4 weeks) | Anti-spike Ab                        | Mainly total SARS-CoV-2 antibodies<br>ELISA assay (Beijing Wantai Biological Pharmacy Enterprise) | 20/396 (5.1)<br><br>164/396 (41.4)<br><br>269/396 (67.9) |
| Ducloux 2021 <sup>24</sup>                         | BNT162b2              | France  | Kidney                                                   | Prospective   | 153 | 2 doses<br>(2.5 months)                                                                                  | Anti-spike Ab                        | SARS-CoV-2 immunoassay (Abbott)                                                                   | 81/153 (53)                                              |
| Firket 2021 <sup>25</sup>                          | BNT162b2              | Belgium | Kidney                                                   | Prospective   | 10  | 1 dose<br>(21 days)<br><br>2 doses<br>(15 days)                                                          | Anti-spike Ab                        | LIAISON SARS-CoV-2 S1/S2 IgG chemiluminescent assay (DiaSorin)                                    | 0/10 (0)<br><br>1/10 (10)                                |
| Georgery 2021 (1 <sup>st</sup> dose) <sup>26</sup> | BNT162b2              | Belgium | Kidney                                                   | Prospective   | 78  | 1 dose<br>(28 days)                                                                                      | Anti-spike Ab                        | Elecsys anti-SARS-CoV-2 (Roche)                                                                   | 3/78 (3.9)                                               |
| Georgery 2021 (2 <sup>nd</sup> dose) <sup>27</sup> | BNT162b2              | Belgium | Kidney                                                   | Prospective   | 79  | 2 doses<br>(28 days)                                                                                     | Anti-spike Ab                        | Elecsys anti-SARS-CoV-2 (Roche)                                                                   | 39/79 (49.4)                                             |
| Grupper 2021 <sup>28</sup>                         | BNT162b2              | Israel  | Kidney                                                   | Prospective   | 136 | 2 doses<br>(10-20 days)                                                                                  | Anti-spike Ab                        | LIAISON SARS-CoV-2 S1/S2 IgG chemiluminescent assay (DiaSorin)                                    | 51/136 (37.5)                                            |
| Guarino 2021 <sup>29</sup>                         | BNT162b2              | Italy   | Liver                                                    | Prospective   | 365 | 2 doses<br>(4 weeks)                                                                                     | Anti-spike Ab                        | LIAISON SARS-CoV-2 S1/S2 IgG chemiluminescent assay (DiaSorin)                                    | 273/365 (74.8)                                           |
| Hall 2021 <sup>30</sup>                            | mRNA-1273             | Canada  | Lung<br>Kidney<br>Kidney-pancreas                        | Prospective   | 127 | 1 dose<br>(4 weeks)<br><br>1 dose                                                                        | Anti-spike Ab<br><br>Neutralizing Ab | Elecsys anti-SARS-CoV-2 (Roche)<br><br>SARS-CoV-2 Surrogate Virus                                 | 6/121 (5)<br><br>7/119 (6)                               |

|                                     |                          |                |                                                                 |               |     |                                                                       |                                              |                                                                                                                                                   |                                                                                                                        |
|-------------------------------------|--------------------------|----------------|-----------------------------------------------------------------|---------------|-----|-----------------------------------------------------------------------|----------------------------------------------|---------------------------------------------------------------------------------------------------------------------------------------------------|------------------------------------------------------------------------------------------------------------------------|
|                                     |                          |                | Heart<br>Liver<br>Others                                        |               |     | (4 weeks)<br><br>2 doses<br>(4-6 weeks)<br><br>2 doses<br>(4-6 weeks) | Anti-spike Ab<br><br>Neutralizing Ab         | Neutralization Test<br>(GenScript)<br><br>Elecsys anti-SARS-CoV-2 (Roche)<br><br>SARS-CoV-2 Surrogate Virus<br>Neutralization Test<br>(GenScript) | 38/110 (34.6)<br><br>29/108 (26.9)                                                                                     |
| Hall 2021 (3 doses) <sup>31</sup>   | mRNA-1273                | Canada         | Kidney<br>Liver<br>Heart<br>Lung<br>Pancreas<br>Combined organs | Prospective   | 60  | 3 doses<br>(4 weeks)                                                  | Anti-spike Ab<br><br>Neutralizing antibodies | Elecsys anti-SARS-CoV-2 (Roche)<br><br>SARS-CoV-2 Surrogate Virus<br>Neutralization Test (GenScript)                                              | 33/60 (55)<br><br>36/60 (60)                                                                                           |
| Haskin 2021 <sup>32</sup>           | BNT162b2                 | Israel         | Kidney                                                          | Prospective   | 38  | 2 doses<br>(median 37 days)                                           | Anti-spike Ab                                | SARS-CoV-2 IgG II Quant assay<br>(Abbott)                                                                                                         | 24/38 (63.2)                                                                                                           |
| Havlin 2021 <sup>33</sup>           | BNT162b2                 | Czech Republic | Lung                                                            | Prospective   | 48  | 2 doses<br>(4-6 weeks)                                                | Anti-spike Ab                                | EUROIMMUN SARS-CoV-2 ELISA<br>assays                                                                                                              | 0/21 (0)                                                                                                               |
| Havlin 3031 (3 doses) <sup>34</sup> | BNT162b2                 | Czech Republic | Lung                                                            | Prospective   | 15  | 3 doses<br>(3 weeks)                                                  | Anti-spike Ab                                | TestLine Clinical Diagnostics                                                                                                                     | 2/15 (13.3)                                                                                                            |
| Herrera 2021 <sup>35</sup>          | mRNA-1273                | Spain          | Heart                                                           | Prospective   | 46  | 1 dose<br>(4 weeks)<br><br>2 doses<br>(4 weeks)                       | Anti-spike Ab                                | Siemens COV2T and Siemens<br>COV2G                                                                                                                | 5/46 (10.9)<br><br>26/46 (56.5)                                                                                        |
|                                     | mRNA-1273                | Spain          | Liver                                                           | Prospective   | 58  | 1 dose<br>(4 weeks)<br><br>2 doses<br>(4 weeks)                       | Anti-spike Ab                                | Siemens COV2T and Siemens<br>COV2G                                                                                                                | 22/58 (37.9)<br><br>41/58 (70.6)                                                                                       |
| Hod 2021 <sup>36</sup>              | BNT162b2                 | Israel         | Kidney                                                          | Retrospective | 120 | 2 doses<br>(2-4 weeks)                                                | Anti-spike Ab<br><br>Neutralizing Ab         | In house ELISA<br><br>SARS-CoV-2 pseudovirus (psSAR-2)<br>neutralization assay (Gert Zimmer)                                                      | 52/120 (43.3)<br><br>42/120 (35)<br>[responders in this<br>study had both<br>positive anti-RBD<br>and neutralizing Ab] |
| Hoffman 2021 <sup>37</sup>          | BNT162b2 or<br>mRNA-1273 | Netherlands    | Lung                                                            | Prospective   | 91  | 2 doses<br>(6 weeks)                                                  | Anti-spike Ab                                | LIAISON SARS-CoV-2 S1/S2 IgG<br>chemiluminescent assay (DiaSorin)                                                                                 | 22/80 (27.5)                                                                                                           |

|                                    |                       |         |                                                                 |             |     |                                                                                                  |                                                                                                                                                                                           |                                                                                                                                 |                                                                              |
|------------------------------------|-----------------------|---------|-----------------------------------------------------------------|-------------|-----|--------------------------------------------------------------------------------------------------|-------------------------------------------------------------------------------------------------------------------------------------------------------------------------------------------|---------------------------------------------------------------------------------------------------------------------------------|------------------------------------------------------------------------------|
| Holden 2021 <sup>38</sup>          | BNT162b2              | Denmark | Kidney<br>Liver<br>Heart<br>Lung                                | Prospective | 80  | 2 doses<br>(median 5.6 weeks)                                                                    | Anti-spike Ab                                                                                                                                                                             | EUROIMMUN SARS-CoV-2 ELISA assays                                                                                               | 28/80 (35)                                                                   |
| Kamar 2021 <sup>39</sup>           | BNT162b2              | France  | Kidney<br>Liver<br>Heart<br>Lung<br>Pancreas                    | Prospective | 101 | 1 dose<br>(before second dose)<br><br>2 doses<br>(before third dose)<br><br>3 doses<br>(4 weeks) | Anti-spike Ab                                                                                                                                                                             | SARS-CoV-2 antibodies ELISA assay (Beijing Wantai Biological Pharmacy Enterprise)                                               | 4/101 (4)<br><br>40/99 (40.4)<br><br>67/99 (67.7)                            |
| Kamar 2021 (4 doses) <sup>40</sup> | BNT162b2              | France  | Kidney<br>Heart<br>Liver<br>Pancreas                            | Prospective | 37  | 4 doses<br>(1 months)                                                                            | Anti-spike Ab                                                                                                                                                                             | SARS-CoV-2 antibodies ELISA assay (Beijing Wantai Biological Pharmacy Enterprise)                                               | 18/37 (48.6)                                                                 |
| Kantauskaite 2021 <sup>41</sup>    | BNT162b2 or mRNA-1273 | Germany | Kidney                                                          | Prospective | 225 | 2 doses<br>(mean 14 days)                                                                        | Anti-spike Ab<br><br>Neutralizing antibodies                                                                                                                                              | Anti-SARS-CoV-2- QuantiVacELISA (Euroimmun)<br><br>SARS-CoV-2 neutralization efficacy (University Hospital Düsseldorf, Germany) | 56/225 (24.9)<br><br>38/56 of people with positive anti-spike Ab             |
| Korth 2021 <sup>42</sup>           | BNT162b2              | Germany | Kidney                                                          | Prospective | 23  | 2 doses<br>(14 days)                                                                             | Anti-spike Ab                                                                                                                                                                             | LIAISON SARS-CoV-2 TrimericS IgG (DiaSorin)                                                                                     | 5/23 (21.7)                                                                  |
| Kumar 2021 (3 doses) <sup>43</sup> | mRNA-1273             | Canada  | Lung<br>Heart<br>Kidney<br>Pancreas<br>Kidney-Pancreas<br>Liver | Prospective | 60  | 3 doses<br>(4-6 weeks)                                                                           | Neutralizing Ab against wild-type virus<br><br>Neutralizing Ab against the Alpha variant<br><br>Neutralizing Ab against the Beta variant<br><br>Neutralizing Ab against the Delta variant | SARS-CoV-2 Surrogate Virus Neutralization Test (GenScript)                                                                      | 40/117 (34.2)<br><br>17/117 (14.5)<br><br>15/117 (12.8)<br><br>21/117 (17.9) |
| Marinaki 2021 <sup>44</sup>        | BNT162b2              | Greece  | Kidney<br>Heart                                                 | Prospective | 34  | 2 doses<br>(median 10 days)                                                                      | Anti-spike Ab                                                                                                                                                                             | SARS-CoV-2 IgG II Quant assay (Abbott)                                                                                          | 20/34 (58.8)                                                                 |

|                                                                   |                                                                                         |         |                                      |               |              |                                                            |                                  |                                                                                                                                             |                                     |
|-------------------------------------------------------------------|-----------------------------------------------------------------------------------------|---------|--------------------------------------|---------------|--------------|------------------------------------------------------------|----------------------------------|---------------------------------------------------------------------------------------------------------------------------------------------|-------------------------------------|
| Marion 2021 <sup>45</sup>                                         | BNT162b2 or mRNA-1273                                                                   | France  | Kidney<br>Heart<br>Liver<br>Pancreas | Prospective   | 576          | 1 dose<br>(before second dose)<br><br>2 doses<br>(4 weeks) | Anti-spike Ab                    | Mainly total SARS-CoV-2 antibodies ELISA assay (Beijing Wantai Biological Pharmacy Enterprise)                                              | 37/576 (6.4)<br><br>124/367 (33.8)  |
| Massa 2021 <sup>46</sup>                                          | BNT162b2                                                                                | France  | Kidney                               | Prospective   | 61           | 3 doses<br>(28 days)                                       | Anti-spike Ab                    | The ARCHITECT SARS-CoV-2 IgG II Quant assay (Abbott)                                                                                        | 38/61 (62.3)                        |
| Masset 2021 <sup>47</sup>                                         | BNT162b2                                                                                | France  | Kidney<br>Kidney-<br>prancreas       | Retrospective | 456          | 2 doses<br>(1 month)<br><br>3 doses<br>(1 month)           | Anti-spike Ab                    | The ARCHITECT SARS-CoV-2 IgG II Quant assay (Abbott) or Atellica chemiluminescence immunoassay (Siemens) or Elecsys anti-SARS-CoV-2 (Roche) | 227/456 (49.8)<br><br>94/136 (69.1) |
| Masset 2021<br>(heterozygous vs homozygous vaccine) <sup>48</sup> | AZD1222-AZD1222 - mRNA vaccine or AZD1222-mRNA-mRNA vaccine<br><br>3 doses mRNA vaccine | France  | Kidney                               | Prospective   | 28<br><br>56 | 3 doses<br>(1 month)                                       | Anti-spike Ab                    | The ARCHITECT SARS-CoV-2 IgG II Quant assay (Abbott), Atellica chemiluminescence immunoassay (Siemens), Elecsys anti-SARS-CoV-2 (Roche)     | 21/28 (75)<br><br>38/56 (67.9)      |
| Mazzola 2021 <sup>49</sup>                                        | BNT162b2                                                                                | France  | Kidney<br>Liver<br>Heart             | Prospective   | 143          | 1 dose<br>(28 days)<br><br>2 doses (28 days)               | Anti-spike Ab                    | The Alinity I SARS-CoV-2 IgG II assay (Abbott)                                                                                              | 9/125 (7.2)<br><br>38/133 (28.6)    |
| Medina-Pestana 2021 <sup>50</sup>                                 | Coronavac                                                                               | Brazil  | Kidney                               | Prospective   | 942          | 1 dose<br>(28 days)                                        | Anti-spike Ab                    | The AdviseDx SARS-CoV-2 IgG II assay (Abbott)                                                                                               | 143/942 (15.2)                      |
| Middleton 2021 <sup>51</sup>                                      | BNT162b2 or AZD1222                                                                     | UK      | Kidney                               | Retrospective | 70           | 1 dose<br>(mean 40 days)                                   | Anti-spike Ab                    | Siemens COV2T and Siemens COV2G                                                                                                             | 16/70 (22.9)                        |
| Midtvedth 2021 <sup>52</sup>                                      | BNT162b2                                                                                | Norway  | Kidney                               | Prospective   | 141          | 2 doses<br>(25-89 days)                                    | Anti-spike, Anti-nucleocapsid Ab | Not reported                                                                                                                                | 25/141 (17.7)                       |
| Miele 2021 <sup>53</sup>                                          | BNT162b2                                                                                | Italy   | Kidney<br>Lung<br>Liver<br>Heart     | Prospective   | 16           | 2 doses<br>(at least 15 days)                              | Anti-spike Ab                    | LIAISON SARS-CoV-2 S1/S2 IgG chemiluminescent assay (DiaSorin)                                                                              | 6/16 (37.5)                         |
| Narasimhan 2021 <sup>54</sup>                                     | BNT162b2 or mRNA-1273                                                                   | USA     | Lung                                 | Prospective   | 73           | 2 doses<br>(not reported)                                  | Anti-spike Ab                    | The Alinity I SARS-CoV-2 IgG II assay (Abbott)                                                                                              | 18/73 (24.7)                        |
| Noble 2021 <sup>55</sup>                                          | BNT162b2 or mRNA-1273                                                                   | France  | Kidney                               | Prospective   | 57           | 2 doses<br>(1 month)                                       | Anti-spike Ab                    | Total SARS-CoV-2 antibodies ELISA assay (Beijing Wantai Biological Pharmacy Enterprise)                                                     | 21/57 (36.8)                        |
| Pedersen 2021 <sup>56</sup>                                       | BNT162b2                                                                                | Denmark | Kidney                               | Prospective   | 58           | 2 doses<br>(4 weeks)                                       | Anti-spike Ab                    | VITROS Immunodiagnostic Products Anti-SARS-CoV-2 IgG (Ortho-Clinical Diagnostics), LIAISON                                                  | 18/58 (31)                          |

|                                     |                                          |         |                          |             |     |                                                                                     |                                  | SARS-CoV-2 TrimericS IgG (DiaSorin)                                                                                                                                                                                                                            |                                             |
|-------------------------------------|------------------------------------------|---------|--------------------------|-------------|-----|-------------------------------------------------------------------------------------|----------------------------------|----------------------------------------------------------------------------------------------------------------------------------------------------------------------------------------------------------------------------------------------------------------|---------------------------------------------|
| Peled 2021 <sup>57</sup>            | BNT162b2                                 | Israel  | Heart                    | Prospective | 77  | 2 doses (21 days)                                                                   | Anti-spike Ab<br>Neutralizing Ab | In house ELISA<br>SARS-CoV-2 pseudovirus (psSAR-2) neutralization assay (Gert Zimmer)                                                                                                                                                                          | 14/77 (18.2)<br>8/77 (10.4)                 |
| Peled 2021 (3 doses) <sup>58</sup>  | BNT162b2                                 | Israel  | Heart                    | Prospective | 96  | 3 doses (18 days)                                                                   | Anti-spike Ab, Neutralizing Ab   | In house ELISA                                                                                                                                                                                                                                                 | 64/96 (67.7)                                |
| Predecki 2021 <sup>59</sup>         | BNT162b2<br>AZD1222                      | UK      | Kidney                   | Prospective | 768 | 2 doses (median 31 days)                                                            | Anti-spike Ab                    | The ARCHITECT SARS-CoV-2 IgG II Quant assay (Abbott)                                                                                                                                                                                                           | 269/410 (66)<br>156/358 (44)                |
| Quiroga 2021 <sup>60</sup>          | BNT162b2, mRNA-1273, Ad26.CoV.2, AZD1222 | Spain   | Kidney                   | Prospective | 43  | - 2 doses for BNT162b2, mRNA-1273, and AZD1222<br>- 1 dose for Ad26.CoV.2 (28 days) | Anti-spike Ab                    | COVID-19 Spike Quantitative Virclia IgG Monotest                                                                                                                                                                                                               | 9/43 (20.9)                                 |
| Rabinowich 2021 <sup>61</sup>       | BNT162b2                                 | Israel  | Liver                    | Prospective | 80  | 2 doses (10-20 days)                                                                | Anti-spike Ab                    | LIAISON SARS-CoV-2 S1/S2 IgG chemiluminescent assay (DiaSorin)                                                                                                                                                                                                 | 38/80 (47.5)                                |
| Rashidi-Alavijeh 2021 <sup>62</sup> | BNT162b2                                 | Germany | Liver                    | Prospective | 43  | 2 doses (median 15 days)                                                            | Anti-spike Ab                    | LIAISON SARS-CoV-2 TrimericS IgG (DiaSorin)                                                                                                                                                                                                                    | 34/43 (79.1)                                |
| Rahav 2021 <sup>63</sup>            | BNT162b2                                 | Israel  | Kidney<br>Heart<br>Liver | Prospective | 227 | 2 doses (2-4 weeks)                                                                 | Anti-spike Ab                    | The ARCHITECT SARS-CoV-2 IgG II Quant assay (Abbott), LIAISON SARS-CoV-2 S1/S2 IgG chemiluminescent assay (DiaSorin), Elecsys anti-SARS-CoV-2 (Roche), VIDAS SARS-COV-2 RBD IgG (BioMérieux), Siemens COV2T, Access SARS-CoV-2 RBD IgG assay (Beckman-Coulter) | 90/227 (39.6)                               |
| Rincon-Arevalo 2021 <sup>64</sup>   | BNT162b2                                 | Germany | Kidney                   | Prospective | 40  | 2 doses (3-4 weeks)                                                                 | Anti-spike Ab<br>Neutralizing Ab | EUROIMMUN SARS-CoV-2 ELISA assays<br>SARS-CoV-2 Surrogate Virus Neutralization Test (GenScript)                                                                                                                                                                | IgA 4/40 (10)<br>IgG 1/40 (2.5)<br>0/40 (0) |
| Rozen-Zvi 2021 <sup>65</sup>        | BNT162b2                                 | Israel  | Kidney                   | Prospective | 308 | 2 doses (median 28 days)                                                            | Anti-spike Ab                    | SARS-CoV-2 IgG II Quant assay (Abbott)                                                                                                                                                                                                                         | 112/308 (36.4)                              |
| Ruether 2021 <sup>66</sup>          | BNT162b2 or mRNA-1273 or AZD1222         | Germany | Liver                    | Prospective | 138 | 2 doses (median 29 days)                                                            | Anti-spike Ab                    | LIAISON SARS-CoV-2 TrimericS IgG (DiaSorin), Elecsys anti-SARS-CoV-2 (Roche)                                                                                                                                                                                   | 84/135 (62)                                 |



|                                  |                                                                                     |            |                                                      |               |     |                                             |                                                                      |                                                                                                                                                                                                                                                                                                                                                      |                                                        |
|----------------------------------|-------------------------------------------------------------------------------------|------------|------------------------------------------------------|---------------|-----|---------------------------------------------|----------------------------------------------------------------------|------------------------------------------------------------------------------------------------------------------------------------------------------------------------------------------------------------------------------------------------------------------------------------------------------------------------------------------------------|--------------------------------------------------------|
| Russo 2021 <sup>67</sup>         | BNT162b2                                                                            | Italy      | Kidney                                               | Retrospective | 82  | 2 doses (median 43 days)                    | Anti-spike Ab                                                        | LIAISON SARS-CoV-2 S1/S2 IgG chemiluminescent assay (DiaSorin)                                                                                                                                                                                                                                                                                       | 43/82 (52.4)                                           |
| Sadioglu 2021 <sup>68</sup>      | CoronaVac                                                                           | Turkey     | Kidney                                               | Prospective   | 85  | 2 doses (median 31 days)                    | Anti-spike Ab                                                        | COVID-19 IgG – ELISA (DIA.PRO)                                                                                                                                                                                                                                                                                                                       | 16/85 (18.8)                                           |
| Sanders 2021 <sup>69</sup>       | mRNA-1273                                                                           | Netherland | Kidney                                               | Prospective   | 288 | 1 doses (28 days)<br>2 doses (28 days)      | Anti-spike Ab                                                        | Not reported                                                                                                                                                                                                                                                                                                                                         | 61/288 (21.2)<br>164/288 (56.9)                        |
| Sattler 2021 <sup>70</sup>       | BNT162b2                                                                            | Germany    | Kidney                                               | Prospective   | 39  | 2 doses (8 days)                            | Anti-spike Ab<br>Neutralizing Ab                                     | EUROIMMUN SARS-CoV-2 ELISA assays<br>SARS-CoV-2 Surrogate Virus Neutralization Test (GenScript)                                                                                                                                                                                                                                                      | IgG 1/39 (2.56%);<br>IgA 4/39 (10.3)<br>0/39 (0)       |
| Schmidt 2021 <sup>71</sup>       | Homologous or heterologous AZD1222 vaccine or mRNA vaccines (BNT162b2 or mRNA-1273) | Germany    | Kidney<br>Heart<br>Lung<br>Liver<br>Liver and kidney | Prospective   | 40  | 1 dose (13-30 days)<br>2 doses (13-30 days) | Anti-spike Ab<br>Neutralizing Ab<br>Anti-spike Ab<br>Neutralizing Ab | EUROIMMUN SARS-CoV-2 ELISA assays<br>SARS-CoV-2-NeutraLISA (Euroimmun)<br>EUROIMMUN SARS-CoV-2 ELISA assays<br>SARS-CoV-2-NeutraLISA (Euroimmun)                                                                                                                                                                                                     | 2/38 (5.3)<br>0/38 (0)<br>12/34 (35.3)<br>10/34 (29.4) |
| Schramm 2021 <sup>72</sup>       | BNT162b2                                                                            | Germany    | Lung<br>Heart<br>Heart-lung                          | Prospective   | 50  | 1 dose (21 days)<br>2 doses (21 days)       | Anti-spike Ab<br>Neutralizing Ab<br>Anti-spike Ab<br>Neutralizing Ab | SARS-CoV-2 IgG II Quant assay (Abbott), EUROIMMUN SARS-CoV-2 ELISA assays, Elecsys anti-SARS-CoV-2 (Roche)<br>SARS-CoV-2 Surrogate Virus Neutralization Test (GenScript)<br>SARS-CoV-2 IgG II Quant assay (Abbott), EUROIMMUN SARS-CoV-2 ELISA assays, Elecsys anti-SARS-CoV-2 (Roche)<br>SARS-CoV-2 Surrogate Virus Neutralization Test (GenScript) | 2/50 (4)<br>0/50 (0)<br>5/50 (10)<br>0/50 (0)          |
| Schrezenmeier 2021 <sup>73</sup> | AZD1222 or BNT162b2 after 2 doses of BNT162b2                                       | Germany    | Kidney                                               | Prospective   | 25  | 3 doses (19-27 days)                        | Anti-spike Ab<br>Neutralizing Ab                                     | EUROIMMUN SARS-CoV-2 ELISA assay<br>SARS-CoV-2 Surrogate Virus Neutralization Test (GenScript)                                                                                                                                                                                                                                                       | 9/25 (36)<br>7/20 (35)                                 |
| Shostak 2021 <sup>74</sup>       | BNT162b2                                                                            | Israel     | Lung                                                 | Prospective   | 168 | 2 doses (14-21 days)                        | Anti-spike Ab                                                        | SARS-CoV-2 IgG II Quant assay (Abbott)                                                                                                                                                                                                                                                                                                               | 31/137 (22.6)                                          |

|                                                    |                                                                                           |         |        |             |     |                                                                                            |                                                   |                                                                                                             |                                                                     |
|----------------------------------------------------|-------------------------------------------------------------------------------------------|---------|--------|-------------|-----|--------------------------------------------------------------------------------------------|---------------------------------------------------|-------------------------------------------------------------------------------------------------------------|---------------------------------------------------------------------|
| Stumpf 2021 (Sub-analysis of DIAVAC) <sup>75</sup> | BNT162b2                                                                                  | Germany | Kidney | Prospective | 71  | 3 doses (4 weeks)                                                                          | Anti-spike Ab                                     | EUROIMMUN SARS-CoV-2 ELISA assays                                                                           | 39/71 (55)                                                          |
| Stumpf 2021 <sup>76</sup>                          | BNT162b2 or mRNA-1273                                                                     | Germany | Kidney | Prospective | 368 | 1 dose (3-4 weeks)<br>2 doses (8 weeks after the first dose)                               | Anti-spike Ab<br>Anti-spike Ab<br>Neutralizing Ab | EUROIMMUN SARS-CoV-2 ELISA assays<br>EUROIMMUN SARS-CoV-2 ELISA assays<br>SARS-CoV-2-NeutraLISA (Euroimmun) | IgA or IgG 11/144 (7.6)<br>IgA or IgG 140/333 (42)<br>79/333 (23.7) |
| Thuluvath 2021 <sup>77</sup>                       | mRNA (BNT162b2 or mRNA-1273) or Janssen                                                   | USA     | Liver  | Prospective | 62  | 2 doses (4 weeks)                                                                          | Anti-spike Ab                                     | Elecsys anti-SARS-CoV-2 (Roche)                                                                             | 24/62 (38.7)                                                        |
| Villanego 2021 <sup>78</sup>                       | BNT162b2 or mRNA-1273                                                                     | Spain   | Kidney | Prospective | 91  | 2 doses (1 month)                                                                          | Anti-spike Ab                                     | SARS-CoV-2 IgG chemiluminescent microparticle immunoassay (Abbott)                                          | 57/91 (62.6)                                                        |
| Werbel 2021 <sup>79</sup>                          | 2 doses of BNT162b2 or mRNA-1273 and dose 3 with BNT162b2 or mRNA-1273 or Janssen 3 doses | USA     | Mixed  | Prospective | 30  | 3 doses (14 days)                                                                          | Anti-spike Ab                                     | EUROIMMUN anti-S1 IgG assay, Elecsys anti-SARS-CoV-2 (Roche)                                                | 14/30 (46.7)                                                        |
| Westhoff 2021 <sup>80</sup>                        | 2 doses of BNT162b2 followed by a dose of mRNA-1273                                       | Germany | Kidney | Prospective | 10  | 3 doses (2 weeks)                                                                          | Anti-spike Ab                                     | Elecsys anti-SARS-CoV-2 (Roche)                                                                             | 6/10 (60)                                                           |
| Wijtvliet 2021 <sup>81</sup>                       | mRNA-1273<br><br>BNT162b2                                                                 | Belgium | Kidney | Prospective | 138 | 1 dose (16-21 days)<br>2 doses (21-35 days)<br>1 dose (16-21 days)<br>2 doses (21-35 days) | Anti-spike Ab                                     | Luminex                                                                                                     | 11/44 (25)<br>32/42 (76.2)<br>8/94 (8.5)<br>51/91 (56)              |
| Yi 2021 <sup>82</sup>                              | BNT162b2 or mRNA-1273                                                                     | USA     | Kidney | Prospective | 145 | 1 dose (not reported)                                                                      | Anti-spike Ab                                     | Not reported                                                                                                | 8/145 (5.5)                                                         |

Ab: antibodies; IQR: interquartile range

**eTable 3.** Grading of Recommendation Assessment, Development and Evaluation (GRADE) for Potential Factors Associated With Diminished Humoral Immune Response

| Potential factors              | Number of studies (number of cohorts) | Number of participants | Univariate |    |   | Multivariate |   |   | GRADE factors     |               |              |             |                  |                       |             |                                          |                 |
|--------------------------------|---------------------------------------|------------------------|------------|----|---|--------------|---|---|-------------------|---------------|--------------|-------------|------------------|-----------------------|-------------|------------------------------------------|-----------------|
|                                |                                       |                        | -          | 0  | + | -            | 0 | + | Study limitations | Inconsistency | Indirectness | Imprecision | Publication bias | Moderate/large effect | Dose effect | Effect of plausible residual confounding | Overall Quality |
| Antimetabolite                 | 25                                    | 3,664                  | 15         | 6  | 0 | 4            | 0 | 0 | ×                 | ×             | ✓            | ✓           | ×                | ✓                     | ×           | ×                                        | ++              |
| Anti-thymocyte globulin        | 5                                     | 721                    | 0          | 4  | 0 | 0            | 1 | 0 | ×                 | ✓             | ✓            | ×           | ×                | ✓                     | ×           | ×                                        | ++              |
| Calcineurin inhibitor          | 17                                    | 2,615                  | 1          | 13 | 1 | 0            | 2 | 0 | ×                 | ✓             | ✓            | ×           | ✓                | ×                     | ×           | ×                                        | ++              |
| Deceased donor status          | 10                                    | 1,891                  | 1          | 9  | 0 | 0            | 0 | 0 | ×                 | ✓             | ✓            | ✓           | ✓                | ×                     | ×           | ×                                        | +++             |
| Male                           | 26                                    | 4,414                  | 0          | 25 | 0 | 0            | 1 | 0 | ×                 | ✓             | ✓            | ×           | ✓                | ×                     | ×           | ×                                        | ++              |
| mTOR inhibitor                 | 21                                    | 3,314                  | 2          | 15 | 1 | 0            | 2 | 1 | ×                 | ✓             | ✓            | ×           | ×                | ×                     | ×           | ×                                        | +               |
| Rituximab                      | 5                                     | 861                    | 0          | 4  | 0 | 1            | 0 | 0 | ×                 | ✓             | ✓            | ✓           | ✓                | ✓                     | ×           | ×                                        | +++             |
| Age                            | 10                                    | 1,955                  | 7          | 3  | 0 | 0            | 0 | 0 | ×                 | ×             | ✓            | ✓           | ×                | ×                     | ×           | ×                                        | +               |
| BMI                            | 9                                     | 1,971                  | 0          | 9  | 0 | 0            | 0 | 0 | ×                 | ✓             | ✓            | ×           | ×                | ×                     | ×           | ×                                        | +               |
| Lymphocyte count               | 4                                     | 413                    | 0          | 3  | 1 | 0            | 0 | 0 | ×                 | ✓             | ✓            | ×           | ×                | ×                     | ×           | ×                                        | +               |
| Duration after transplantation | 9                                     | 1,667                  | 0          | 7  | 2 | 0            | 0 | 0 | ×                 | ×             | ✓            | ✓           | ✓                | ×                     | ×           | ×                                        | ++              |

BMI: Body Mass Index

**Note:** For uni- and multivariate analyses: +, number of significant effects with a positive value; 0, number of non-significant effects; -, number of significant effects with a negative value. For GRADE factors: ✓, no serious limitations; ×, serious limitations (or not present for moderate/large effect size, dose effect); unclear, unable to rate item based on available information. For overall quality of evidence: +, very low; ++, low; +++, moderate; +++++, high. **Reference:** Hugué et al. Systematic Reviews 2013, 2:71.

**eTable 4.** Humoral Immune Response Rates After 2 Doses of mRNA Vaccines by the Different Testing

| Methods                                                                           | Percentage of average seroconversion rates (range) | Numbers of the primary studies               |
|-----------------------------------------------------------------------------------|----------------------------------------------------|----------------------------------------------|
| Anti-spike antibodies                                                             |                                                    |                                              |
| Alinity I SARS-CoV-2 IgG II assay (Abbott)                                        | 29.2 (24.7 – 40.5)                                 | 3 studies <sup>14,49,54</sup>                |
| ARCHITECT SARS-CoV-2 IgG II Quant assay (Abbott)                                  | 46.7 (27.7 – 65.6)                                 | 9 studies <sup>3,5,9,19,32,44,59,65,74</sup> |
| SARS-CoV-2 antibodies ELISA assay (Beijing Wantai Biological Pharmacy Enterprise) | 39.1 (36.8 – 40.4)                                 | 2 studies <sup>39,55</sup>                   |
| LIAISON SARS-CoV-2 S1/S2 IgG chemiluminescent assay (DiaSorin)                    | 59.8 (10 - 74.8)                                   | 6 studies <sup>25,28,29,53,61,67</sup>       |
| LIAISON SARS-CoV-2 TrimericS IgG (DiaSorin)                                       | 42.9 (4.1 - 79.1)                                  | 6 studies <sup>17,20,22,37,42,62</sup>       |
| EUROIMMUN SARS-CoV-2 ELISA assay                                                  | 28.6 (0 - 42)                                      | 6 studies <sup>33,38,41,64,70,76</sup>       |
| Luminex                                                                           | 47.2 (29.9 – 76.2)                                 | 2 study <sup>18,81</sup>                     |
| Elecsys anti-SARS-CoV-2 (Roche)                                                   | 41.5 (34.6 - 49.4)                                 | 3 studies <sup>27,307</sup>                  |
| Siemens COV2T and Siemens COV2G                                                   | 64.4 (56.5 - 70.7)                                 | 1 study (2 cohorts) <sup>35</sup>            |
| Quest Diagnostics                                                                 | 47.8                                               | 1 study <sup>83</sup>                        |
| Neutralizing antibodies                                                           |                                                    |                                              |
| SARS-CoV-2 Surrogate Virus Neutralization Test (GenScript)                        | 25.9 (0 – 26.9)                                    | 4 studies <sup>30,64,70,72</sup>             |
| SARS-CoV-2 pseudovirus (psSAR-2) neutralization assay (Gert Zimmer)               | 25.4 (10.4 – 35)                                   | 2 studies <sup>36,57</sup>                   |
| SARS-CoV-2-NeutraLISA (Euroimmun)                                                 | 23.7                                               | 1 study <sup>76</sup>                        |

**eTable 5.** Humoral Immune Response by the COVID-19 Vaccine Types and Doses

| Study                        | Antibody measurement | Methods                                                                                                                           | Timing of Ab testing | Responders/Total | Seroconversion rate |
|------------------------------|----------------------|-----------------------------------------------------------------------------------------------------------------------------------|----------------------|------------------|---------------------|
| BNT162b2 vaccine (1 dose)    |                      |                                                                                                                                   |                      |                  |                     |
| Ben Zadok 2021 <sup>3</sup>  | Anti-spike Ab        | The ARCHITECT SARS-CoV-2 IgG II Quant assay (Abbott)                                                                              | 21 days              | 6/39             | 15.38%              |
| Bertrand 2021 <sup>3</sup>   | Anti-spike Ab        | The ARCHITECT SARS-CoV-2 IgG II Quant assay (Abbott)                                                                              | 3 weeks              | 1/45             | 2.22%               |
| Chavarot 2021 <sup>15</sup>  | Anti-spike Ab        | SARS-CoV-2 IgG II Quant assay (Abbott) or total SARS-CoV-2 antibodies ELISA assay (Beijing Wantai Biological Pharmacy Enterprise) | 28 days              | 2/101            | 1.98%               |
| Firket 2021 <sup>25</sup>    | Anti-spike Ab        | LIAISON SARS-CoV-2 S1/S2 IgG chemiluminescent assay (DiaSorin)                                                                    | 21 days              | 0/10             | 0%                  |
| Del Bello 2021 <sup>23</sup> | Anti-spike Ab        | Mainly total SARS-CoV-2 antibodies ELISA assay (Beijing Wantai Biological Pharmacy Enterprise)                                    | Before second dose   | 20/396           | 5.05%               |
| Georgery 2021 <sup>26</sup>  | Anti-spike Ab        | Elecsys anti-SARS-CoV-2 (Roche)                                                                                                   | 28 days              | 3/78             | 3.85%               |
| Havlin 2021 <sup>33</sup>    | Anti-spike Ab        | Euroimmun, TestLine Clinical Diagnostics, LIAISON SARS-CoV-2 TrimericS IgG (DiaSorin)                                             | Before second dose   | 0/46             | 0.00%               |
| Kamar 2021 <sup>39</sup>     | Anti-spike Ab        | SARS-CoV-2 antibodies ELISA assay (Beijing Wantai Biological Pharmacy Enterprise)                                                 | Before 2nd dose      | 0/101            | 0%                  |
| Mazzola 2021 <sup>49</sup>   | Anti-spike Ab        | The Alinity I SARS-CoV-2 IgG II assay (Abbott)                                                                                    | 28 days              | 9/125            | 7.2%                |
| Schramm 2021 <sup>72</sup>   | Anti-spike Ab        | SARS-CoV-2 IgG II Quant assay (Abbott), EUROIMMUN SARS-CoV-2 ELISA assays, Elecsys anti-SARS-CoV-2 (Roche)                        | 21 days              | 2/50             | 4.00%               |
|                              | Neutralizing Ab      | SARS-CoV-2 Surrogate Virus Neutralization Test (GenScript)                                                                        | 21 days              | 0/50             | 0%                  |
| Wijtvliet 2021 <sup>81</sup> | Anti-spike Ab        | Luminex                                                                                                                           | 16-21 days           | 8/94             | 8.51%               |
| mRNA-1273 vaccine (1 dose)   |                      |                                                                                                                                   |                      |                  |                     |

|                                      |                 |                                                                                                                                   |                               |        |        |
|--------------------------------------|-----------------|-----------------------------------------------------------------------------------------------------------------------------------|-------------------------------|--------|--------|
| Benotmane 2021 (1 dose) <sup>4</sup> | Anti-spike Ab   | The ARCHITECT SARS-CoV-2 IgG II Quant assay (Abbott)                                                                              | 28 days                       | 26/241 | 10.79% |
| Herrera 2021 (Heart) <sup>35</sup>   | Anti-spike Ab   | Siemens COV2T and Siemens COV2G                                                                                                   | 4 weeks                       | 5/46   | 10.87% |
| Herrera 2021 (Liver) <sup>35</sup>   | Anti-spike Ab   | Siemens COV2T and Siemens COV2G                                                                                                   | 4 weeks                       | 22/58  | 37.93% |
| Hall 2021 <sup>30</sup>              | Anti-spike Ab   | Elecsys anti-SARS-CoV-2 (Roche)                                                                                                   | 4 weeks                       | 6/121  | 4.96%  |
|                                      | Neutralizing Ab | SARS-CoV-2 Surrogate Virus Neutralization Test (GenScript)                                                                        | 4 weeks                       | 7/119  | 5.88%  |
| Sanders 2021 <sup>69</sup>           | Anti-spike Ab   | Not reported                                                                                                                      | 28 days                       | 61/288 | 21.18% |
| Wijtvliet 2021 <sup>81</sup>         | Anti-spike Ab   | Luminex                                                                                                                           | 16-21 days                    | 11/44  | 25.00% |
| Mixed mRNA (1 dose)                  |                 |                                                                                                                                   |                               |        |        |
| Boyarsky 2021 <sup>11</sup>          | Anti-spike Ab   | Elecsys anti-SARS-CoV-2 (Roche) or EUROIMMUN SARS-CoV-2 ELISA assay                                                               | Median 21 days                | 76/436 | 17.43% |
| Marion 2021 <sup>45</sup>            | Anti-spike Ab   | Mainly total SARS-CoV-2 antibodies ELISA assay (Beijing Wantai Biological Pharmacy Enterprise)                                    | Before second dose            | 37/576 | 6.42%  |
| Stumpf 2021 <sup>76</sup>            | Anti-spike Ab   | EUROIMMUN SARS-CoV-2 ELISA assays                                                                                                 | 3-4 weeks                     | 11/144 | 7.64%  |
| Yi 2021 <sup>82</sup>                | Anti-spike Ab   | Not reported                                                                                                                      | Not reported                  | 8/145  | 5.52%  |
| BNT162b2 vaccine (2 doses)           |                 |                                                                                                                                   |                               |        |        |
| Bergman 2021 <sup>7</sup>            | Anti-spike Ab   | Elecsys anti-SARS-CoV-2 (Roche), EUROIMMUN SARS-CoV-2 ELISA assays                                                                | 14 days                       | 36/83  | 43.37% |
| Ben Zadok 2021 <sup>3</sup>          | Anti-spike Ab   | The ARCHITECT SARS-CoV-2 IgG II Quant assay (Abbott)                                                                              | 35-40 days (after first dose) | 18/37  | 48.65% |
| Bertrand 2021 <sup>5</sup>           | Anti-spike Ab   | The ARCHITECT SARS-CoV-2 IgG II Quant assay (Abbott)                                                                              | 4 weeks                       | 65/235 | 27.66% |
| Chavarot 2021 <sup>15</sup>          | Anti-spike Ab   | SARS-CoV-2 IgG II Quant assay (Abbott) or total SARS-CoV-2 antibodies ELISA assay (Beijing Wantai Biological Pharmacy Enterprise) | 1 month                       | 2/35   | 5.71%  |

|                                       |                 |                                                                                                |                                                 |         |        |
|---------------------------------------|-----------------|------------------------------------------------------------------------------------------------|-------------------------------------------------|---------|--------|
| Cholankeril 2021 <sup>83</sup>        | Anti-spike Ab   | Quest Diagnostics                                                                              | Median (IQR) 81 (72-90) days (after first dose) | 33/69   | 47.83% |
| Danthu 2021 <sup>20</sup>             | Anti-spike Ab   | LIAISON SARS-CoV-2 TrimericS IgG (DiaSorin)                                                    | 36 days                                         | 3/74    | 4.05%  |
| Davidov 2021 <sup>21</sup>            | Anti-spike Ab   | Not reported                                                                                   | Median (IQR) 36 (17-52) days                    | 55/76   | 72.37% |
| Del Bello 2021 <sup>23</sup>          | Anti-spike Ab   | Mainly total SARS-CoV-2 antibodies ELISA assay (Beijing Wantai Biological Pharmacy Enterprise) | Before third dose                               | 164/396 | 41.41% |
| Ducloux 2021 <sup>24</sup>            | Anti-spike Ab   | SARS-CoV-2 immunoassay (Abbott)                                                                | 2.5 months                                      | 81/153  | 52.94% |
| Firket 2021 <sup>25</sup>             | Anti-spike Ab   | LIAISON SARS-CoV-2 S1/S2 IgG chemiluminescent assay (DiaSorin)                                 | 15 days                                         | 1/10    | 10.00% |
| Georgery 2021 (2 doses) <sup>27</sup> | Anti-spike Ab   | Elecsys anti-SARS-CoV-2 (Roche)                                                                | 28 days                                         | 39/79   | 49.37% |
| Grupper 2021 <sup>28</sup>            | Anti-spike Ab   | LIAISON SARS-CoV-2 S1/S2 IgG chemiluminescent assay (DiaSorin)                                 | 10-20 d                                         | 51/136  | 37.50% |
| Guarino 2021 <sup>29</sup>            | Anti-spike Ab   | LIAISON SARS-CoV-2 S1/S2 IgG chemiluminescent assay (DiaSorin)                                 | 4 weeks                                         | 273/365 | 74.79% |
| Haskin 2021 <sup>32</sup>             | Anti-spike Ab   | The ARCHITECT SARS-CoV-2 IgG II Quant assay (Abbott)                                           | 1 week                                          | 24/38   | 63.16% |
| Havlin 2021 <sup>33</sup>             | Anti-spike Ab   | EUROIMMUN SARS-CoV-2 ELISA assays                                                              | 4-6 weeks                                       | 0/21    | 0.00%  |
| Hod 2021 <sup>36</sup>                | Anti-spike Ab   | In-house ELISA                                                                                 | 2-4 weeks                                       | 52/120  | 43.33% |
|                                       | Neutralizing Ab | SARS-CoV-2 pseudovirus (psSAR-2) neutralization assay, (Gert Zimmer)                           | 2-4 weeks                                       | 42/120  | 35.00% |
| Holden 2021 <sup>38</sup>             | Anti-spike Ab   | EUROIMMUN SARS-CoV-2 ELISA assays                                                              | Median (IQR) 5.6 (5.1-6.3) weeks                | 28/80   | 35%    |
| Kamar 2021 <sup>39</sup>              | Anti-spike Ab   | SARS-CoV-2 antibodies ELISA assay (Beijing Wantai Biological Pharmacy Enterprise)              | Before third dose                               | 40/99   | 40.40% |
| Korth 2021 <sup>42</sup>              | Anti-spike Ab   | LIAISON SARS-CoV-2 TrimericS IgG (DiaSorin)                                                    | 14 days                                         | 5/23    | 21.74% |

|                                     |                                     |                                                                                                                                                                                                                                                                |                              |         |        |
|-------------------------------------|-------------------------------------|----------------------------------------------------------------------------------------------------------------------------------------------------------------------------------------------------------------------------------------------------------------|------------------------------|---------|--------|
| Marinaki 2021 <sup>44</sup>         | Anti-spike Ab                       | The ARCHITECT SARS-CoV-2 IgG II Quant assay (Abbott)                                                                                                                                                                                                           | Median 10 days               | 20/34   | 58.82% |
| Masset 2021 <sup>47</sup>           | Anti-spike Ab                       | The ARCHITECT SARS-CoV-2 IgG II Quant assay (Abbott) or Atellica chemiluminescence immunoassay (Siemens) or Elecsys anti-SARS-CoV-2 (Roche)                                                                                                                    | 1 month                      | 227/456 | 49.78% |
| Mazzola 2021 <sup>49</sup>          | Anti-spike Ab                       | The Alinity I SARS-CoV-2 IgG II assay (Abbott)                                                                                                                                                                                                                 | 28 days                      | 38/133  | 28.57% |
| Miele 2021 <sup>53</sup>            | Anti-spike Ab                       | LIAISON SARS-CoV-2 S1/S2 IgG chemiluminescent assay (DiaSorin)                                                                                                                                                                                                 | At least 15 days             | 6/16    | 37.5%  |
| Pederson 2021 <sup>56</sup>         | Anti-spike Ab                       | VITROS Immunodiagnostic Products Anti-SARS-CoV-2 IgG (Ortho-Clinical Diagnostics), LIAISON SARS-CoV-2 TrimericS IgG (DiaSorin)                                                                                                                                 | 4 weeks                      | 18/58   | 31.03% |
| Midtvedth 2021 <sup>52</sup>        | Anti-spike Ab, Anti-nucleocapsid Ab | Not reported                                                                                                                                                                                                                                                   | 25-89 d                      | 25/141  | 17.73% |
| Peled 2021 <sup>57</sup>            | Anti-spike Ab                       | In-house ELISA                                                                                                                                                                                                                                                 | 21 days                      | 14/77   | 18.18% |
|                                     | Neutralizing Ab                     | SARS-CoV-2 pseudovirus (psSAR-2) neutralization assay (Gert Zimmer)                                                                                                                                                                                            | 21 days                      | 8/77    | 10.39% |
| Predecki 2021 <sup>59</sup>         | Anti-spike Ab                       | The ARCHITECT SARS-CoV-2 IgG II Quant assay (Abbott)                                                                                                                                                                                                           | Median 31 days               | 269/410 | 65.61% |
| Rabinowich 2021 <sup>61</sup>       | Anti-spike Ab                       | LIAISON SARS-CoV-2 S1/S2 IgG chemiluminescent assay (DiaSorin)                                                                                                                                                                                                 | 10-20 days                   | 38/80   | 47.50% |
| Rashidi-Alavijeh 2021 <sup>62</sup> | Anti-spike Ab                       | LIAISON SARS-CoV-2 TrimericS IgG (DiaSorin)                                                                                                                                                                                                                    | Median (IQR) 15 days (12-24) | 34/43   | 79.07% |
| Rahav 2021 <sup>63</sup>            | Anti-spike Ab                       | The ARCHITECT SARS-CoV-2 IgG II Quant assay (Abbott), LIAISON SARS-CoV-2 S1/S2 IgG chemiluminescent assay (DiaSorin), Elecsys anti-SARS-CoV-2 (Roche), VIDAS SARS-COV-2 RBD IgG (BioMérieux), Siemens COV2T, Access SARS-CoV-2 RBD IgG assay (Beckman-Coulter) | 2-4 weeks                    | 90/227  | 39.65% |
| Rincon-Arevalo 2021 <sup>64</sup>   | Anti-spike Ab (IgA)                 | EUROIMMUN SARS-CoV-2 ELISA assays                                                                                                                                                                                                                              | 3-4 weeks                    | 4/40    | 10.00% |



|                                                    |                     |                                                                                                            |                      |         |        |
|----------------------------------------------------|---------------------|------------------------------------------------------------------------------------------------------------|----------------------|---------|--------|
| Rincon-Arevalo 2021 <sup>64</sup>                  | Anti-spike Ab (IgG) | EUROIMMUN SARS-CoV-2 ELISA assays                                                                          | 3-4 weeks            | 1/40    | 2.50%  |
|                                                    | Neutralizing Ab     | SARS-CoV-2 Surrogate Virus Neutralization Test (GenScript)                                                 | 3-4 weeks            | 0/40    | 0.00%  |
| Rozen-Zvi 2021 <sup>65</sup>                       | Anti-spike Ab       | The ARCHITECT SARS-CoV-2 IgG II Quant assay (Abbott)                                                       | 2-4 weeks            | 112/308 | 36.36% |
| Russo 2021 <sup>67</sup>                           | Anti-spike Ab       | LIAISON SARS-CoV-2 S1/S2 IgG chemiluminescent assay (DiaSorin)                                             | Median 43 days       | 43/82   | 52.44% |
| Sattler 2021 <sup>70</sup>                         | Anti-spike Ab (IgG) | EUROIMMUN SARS-CoV-2 ELISA assays                                                                          | Mean (SD) 8 (1) days | 1/39    | 2.56%  |
| Sattler 2021 <sup>70</sup>                         | Anti-spike Ab (IgA) | EUROIMMUN SARS-CoV-2 ELISA assays                                                                          | Mean (SD) 8 (1) days | 4/39    | 10.26% |
|                                                    | Neutralizing Ab     | SARS-CoV-2 Surrogate Virus Neutralization Test (GenScript)                                                 | Mean (SD) 8 (1) days | 0/39    | 0.00%  |
| Schramm 2021 <sup>72</sup>                         | Anti-spike Ab       | SARS-CoV-2 IgG II Quant assay (Abbott), EUROIMMUN SARS-CoV-2 ELISA assays, Elecsys anti-SARS-CoV-2 (Roche) | 21 days              | 5/50    | 10.00% |
|                                                    | Neutralizing Ab     | SARS-CoV-2 Surrogate Virus Neutralization Test (GenScript)                                                 | 21 days              | 0/50    | 0%     |
| Shostak 2021 <sup>74</sup>                         | Anti-spike Ab       | The ARCHITECT SARS-CoV-2 IgG II Quant assay (Abbott)                                                       | 14-21 days           | 31/137  | 22.63% |
| Wijtvliet 2021 <sup>81</sup>                       | Anti-spike Ab       | Luminex                                                                                                    | 21-35 days           | 51/91   | 56.04% |
| mRNA-1273 vaccine (2 doses)                        |                     |                                                                                                            |                      |         |        |
| Benotmane 2021 (2 <sup>nd</sup> dose) <sup>5</sup> | Anti-spike Ab       | The ARCHITECT SARS-CoV-2 IgG II Quant assay (Abbott)                                                       | 28 days              | 98/204  | 48.04% |
| Crespo 2021 <sup>17</sup>                          | Anti-spike Ab       | LIAISON SARS-CoV-2 TrimericS IgG (DiaSorin)                                                                | 28 days              | 57/90   | 63.33% |
| Cucchiari 2021 <sup>18</sup>                       | Anti-spike Ab       | Luminex                                                                                                    | 2 weeks              | 35/117  | 29.91% |
| Hall 2021 <sup>30</sup>                            | Anti-spike Ab       | Elecsys anti-SARS-CoV-2 (Roche)                                                                            | 4-6 weeks            | 38/110  | 34.55% |
|                                                    | Neutralizing Ab     | SARS-CoV-2 Surrogate Virus Neutralization Test (GenScript)                                                 | 4-6 weeks            | 29/108  | 26.85% |

|                                   |                 |                                                                                                |                |         |        |
|-----------------------------------|-----------------|------------------------------------------------------------------------------------------------|----------------|---------|--------|
| Herrera 2021 (Heart)<br>35        | Anti-spike Ab   | Siemens COV2T and Siemens COV2G                                                                | 4 weeks        | 26/46   | 56.52% |
| Herrera 2021 (Liver)<br>35        | Anti-spike Ab   | Siemens COV2T and Siemens COV2G                                                                | 4 weeks        | 41/58   | 70.69% |
| Sanders 2021 <sup>69</sup>        | Anti-spike Ab   | Not reported                                                                                   | 28 days        | 164/288 | 56.94% |
| Wijtvliet 2021 <sup>81</sup>      | Anti-spike Ab   | Luminex                                                                                        | 21-35 days     | 32/42   | 76.19% |
| Mixed mRNA (2 doses)              |                 |                                                                                                |                |         |        |
| Boyarsky 2021 (2 doses)           | Anti-spike Ab   | Elecsys anti-SARS-CoV-2 (Roche)                                                                | Median 29 days | 357/658 | 54.26% |
| Cao 2021 <sup>14</sup>            | Anti-spike Ab   | The Alinity I SARS-CoV-2 IgG II assay (Abbott)                                                 | Not reported   | 15/37   | 40.54% |
| Dębska-Słizień 2021 <sup>22</sup> | Anti-spike Ab   | LIAISON SARS-CoV-2 TrimericS IgG (DiaSorin)                                                    | 14-21 days     | 73/142  | 51.41% |
| D'Offizi 2021 <sup>19</sup>       | Anti-spike Ab   | The ARCHITECT SARS-CoV-2 IgG II Quant assay (Abbott)                                           | 2 weeks        | 47/61   | 77.05% |
|                                   | Neutralizing Ab | SARS-CoV2/Human/ITA/PAVIA10734/2020 provided by F. Baldanti, Pavia                             | 2 weeks        | 29/61   | 47.54% |
| Hoffman 2021 <sup>37</sup>        | Anti-spike Ab   | LIAISON SARS-CoV-2 TrimericS IgG (DiaSorin)                                                    | 6 weeks        | 22/80   | 27.50% |
| Kantauskaite 2021 <sup>41</sup>   | Anti-spike Ab   | Anti-SARS-CoV-2- QuantiVacELISA (Euroimmun)                                                    | Mean 14 days   | 56/225  | 24.89% |
| Marion 2021 <sup>45</sup>         | Anti-spike Ab   | Mainly total SARS-CoV-2 antibodies ELISA assay (Beijing Wantai Biological Pharmacy Enterprise) | 4 weeks        | 124/367 | 33.79% |
| Narasimhan 2021 <sup>54</sup>     | Anti-spike Ab   | The Alinity I SARS-CoV-2 IgG II assay (Abbott)                                                 | Not reported   | 18/73   | 24.66% |
| Noble 2021 <sup>55</sup>          | Anti-spike Ab   | Total SARS-CoV-2 antibodies ELISA assay (Beijing Wantai Biological Pharmacy Enterprise)        | 1 month        | 21/57   | 36.84% |
| Stumpf 2021 <sup>76</sup>         | Anti-spike Ab   | EUROIMMUN SARS-CoV-2 ELISA assays                                                              | 8 weeks        | 140/333 | 42.04% |
|                                   | Neutralizing Ab | SARS-CoV-2-NeutraLISA (Euroimmun)                                                              | 8 weeks        | 79/333  | 23.72% |

|                                                   |                                |                                                                                                                                         |                              |         |        |
|---------------------------------------------------|--------------------------------|-----------------------------------------------------------------------------------------------------------------------------------------|------------------------------|---------|--------|
| Villanego 2021 <sup>78</sup>                      | Anti-spike Ab                  | SARS-CoV-2 IgG chemiluminescent microparticle immunoassay (Abbott)                                                                      | 1 month                      | 57/91   | 62.64% |
| BNT162b2 vaccine (3 doses)                        |                                |                                                                                                                                         |                              |         |        |
| Bertrand 2021 (3 doses) <sup>10</sup>             | Anti-spike Ab                  | The ARCHITECT SARS-CoV-2 IgG II Quant assay (Abbott)                                                                                    | 1 month                      | 49/80   | 61.25% |
| Del Bello 2021 <sup>23</sup>                      | Anti-spike Ab                  | Mainly total SARS-CoV-2 antibodies ELISA assay (Beijing Wantai Biological Pharmacy Enterprise)                                          | 4 weeks                      | 269/396 | 67.93% |
| Havlin 2021 (3 doses) <sup>34</sup>               | Anti-spike Ab                  | TestLine Clinical Diagnostics                                                                                                           | 3 weeks                      | 2/15    | 13.33% |
| Kamar 2021 <sup>39</sup>                          | Anti-spike Ab                  | SARS-CoV-2 antibodies ELISA assay (Beijing Wantai Biological Pharmacy Enterprise)                                                       | 4 weeks                      | 67/99   | 67.68% |
| Massa 2021 <sup>46</sup>                          | Anti-spike Ab                  | The ARCHITECT SARS-CoV-2 IgG II Quant assay (Abbott)                                                                                    | 28 days                      | 38/56   | 62.30% |
| Masset 2021 <sup>47</sup>                         | Anti-spike Ab                  | The ARCHITECT SARS-CoV-2 IgG II Quant assay (Abbott), Atellica chemiluminescence immunoassay (Siemens), Elecsys anti-SARS-CoV-2 (Roche) | 1 month                      | 94/136  | 69.12% |
| Peled 2021 (3 doses) <sup>58</sup>                | Anti-spike Ab, Neutralizing Ab | In house ELISA                                                                                                                          | 18 days                      | 64/96   | 66.67% |
| Stumpf 2021 (Subanalysis of DIAVAC) <sup>75</sup> | Anti-spike Ab                  | EUROIMMUN SARS-CoV-2 ELISA assays                                                                                                       | 4 weeks                      | 39/71   | 55%    |
| mRNA-1273 vaccine (3 doses)                       |                                |                                                                                                                                         |                              |         |        |
| Benotmane 2021 (3 doses) <sup>10</sup>            | Anti-spike Ab                  | The ARCHITECT SARS-CoV-2 IgG II Quant assay (Abbott)                                                                                    | Median (IQR) 28 days (27-33) | 78/159  | 49.06% |
| Hall 2021 (3 doses) <sup>31</sup>                 | Anti-spike Ab                  | Elecsys anti-SARS-CoV-2 (Roche)                                                                                                         | 4 weeks                      | 33/60   | 55%    |
|                                                   | Neutralizing Ab                | SARS-CoV-2 Surrogate Virus Neutralization Test (GenScript)                                                                              | 4 weeks                      | 36/60   | 60%    |
| Mixed mRNA (3 doses)                              |                                |                                                                                                                                         |                              |         |        |

|                                                                  |               |                                                                                   |                              |         |        |
|------------------------------------------------------------------|---------------|-----------------------------------------------------------------------------------|------------------------------|---------|--------|
| Westhoff 2021 <sup>80</sup>                                      | Anti-spike Ab | Elecsys anti-SARS-CoV-2 (Roche)                                                   | 2 weeks                      | 6/10    | 60%    |
| BNT162b2 vaccine (4 doses)                                       |               |                                                                                   |                              |         |        |
| Kamar 2021 (4 <sup>th</sup> dose) <sup>40</sup>                  | Anti-spike Ab | SARS-CoV-2 antibodies ELISA assay (Beijing Wantai Biological Pharmacy Enterprise) | 1 month                      | 18/37   | 48.65% |
| mRNA (4 doses)                                                   |               |                                                                                   |                              |         |        |
| Alejo 2021 <sup>1</sup>                                          | Anti-spike Ab | Elecsys anti-SARS-CoV-2 (Roche) or EUROIMMUN SARS-CoV-2 ELISA assay               | 2-6 weeks                    | 15/18   | 83.33% |
| Janssen (1 dose)                                                 |               |                                                                                   |                              |         |        |
| Boyarsky 2021 <sup>13</sup>                                      | Anti-spike Ab | Elecsys anti-SARS-CoV-2 (Roche)                                                   | Median (IQR) 33 days (31-44) | 2/12    | 16.67% |
| CoronaVac (1 dose)                                               |               |                                                                                   |                              |         |        |
| Medina-Pestana 2021 <sup>50</sup>                                | Anti-spike Ab | The AdviseDx SARS-CoV-2 IgG II assay (Abbott)                                     | 28 days                      | 143/942 | 15.18% |
| CoronaVac (2 doses)                                              |               |                                                                                   |                              |         |        |
| Medina-Pestana 2021 <sup>50</sup>                                | Anti-spike Ab | The AdviseDx SARS-CoV-2 IgG II assay (Abbott)                                     | Median 40 (IQR 32-46) days   | 368/856 | 42.99% |
| Sadioğlu 2021 <sup>68</sup>                                      | Anti-spike Ab | COVID-19 IgG – ELISA (DIA.PRO)                                                    | Median 31 days               | 16/85   | 18.82% |
| Other vaccine platforms                                          |               |                                                                                   |                              |         |        |
| Azzi 2021 (mRNA vaccines 2 doses or Janssen 1 dose) <sup>2</sup> | Anti-spike Ab | VITROS Immunodiagnostic Products Anti-SARS-CoV-2 IgG (Ortho-Clinical Diagnostics) | Median 28 days               | 24/76   | 31.58% |
| Middleton 2021 (AZD1222 or BNT162b2 1 dose) <sup>51</sup>        | Anti-spike Ab | Siemens COV2T and Siemens COV2G                                                   | Mean 40 days                 | 16/70   | 22.86% |
| Predecki 2021 (AZD1222 2 doses) <sup>59</sup>                    | Anti-spike Ab | The ARCHITECT SARS-CoV-2 IgG II Quant assay (Abbott)                              | Median 31 days               | 156/358 | 43.58% |

|                                                                                                                                         |                 |                                                                                                                                    |                |                                |                 |
|-----------------------------------------------------------------------------------------------------------------------------------------|-----------------|------------------------------------------------------------------------------------------------------------------------------------|----------------|--------------------------------|-----------------|
| Quiroga 2021<br>(BNT162b2 or mRNA-1273 or AZD1222 2 doses and Ad26.CoV.2 1 dose) <sup>60</sup>                                          | Anti-spike Ab   | COVID-19 Spike Quantitative Virclia IgG Monotest                                                                                   | 28 days        | 9/43                           | 20.93%          |
| Masset 2021<br>(AZD1222 2 doses followed by 1 dose of mRNA vaccine or AZD1222 1 dose followed by 2 doses of mRNA vaccine) <sup>48</sup> | Anti-spike Ab   | Elecsys anti-SARS-CoV-2 (Roche), The ARCHITECT SARS-CoV-2 IgG II Quant assay (Abbott), LIAISON SARS-CoV-2 TrimericS IgG (DiaSorin) | 1 month        | 21/28                          | 75.00%          |
| Ruether 2021 <sup>66</sup>                                                                                                              | Anti-spike Ab   | LIAISON SARS-CoV-2 TrimericS IgG (DiaSorin), Elecsys anti-SARS-CoV-2 (Roche)                                                       | Median 29 days | 84/135                         | 62.22%          |
| Schrezenmeier 2021 <sup>73</sup>                                                                                                        | Anti-spike Ab   | EUROIMMUN SARS-CoV-2 ELISA assays                                                                                                  | 19-27 days     | 9/25                           | 36.00%          |
|                                                                                                                                         | Neutralizing Ab | SARS-CoV-2 Surrogate Virus Neutralization Test (GenScript)                                                                         | 19-27 days     | 7/20                           | 35.00%          |
| Schmidt 2021<br>(Homologous or heterologous AZD1222 vaccine or mRNA vaccines 2 doses) <sup>71</sup>                                     | Anti-spike Ab   | EUROIMMUN SARS-CoV-2 ELISA assays                                                                                                  | 13-30 days     | 1 dose: 2/38<br>2 doses: 12/34 | 5.26%<br>35.29% |
|                                                                                                                                         | Neutralizing Ab | SARS-CoV-2-NeutraLISA (Euroimmun)                                                                                                  | 13-30 days     | 1 dose: 0/38<br>2 doses: 10/34 | 0%<br>29.41%    |
| Thuluvath 2021<br>(mRNA vaccines 2 doses or Janssen 1 dose) <sup>77</sup>                                                               | Anti-spike Ab   | Elecsys anti-SARS-CoV-2 (Roche)                                                                                                    | 4 weeks        | 24/62                          | 39%             |
| Werbelt 2021<br>(mRNA or Janssen 3 doses) <sup>79</sup>                                                                                 | Anti-spike Ab   | EUROIMMUN anti-S1 IgG assay, Elecsys anti-SARS-CoV-2 (Roche)                                                                       | 14 days        | 14/30                          | 46.67%          |

Ab: antibodies; IQR: interquartile range; SD: standard deviation

**eTable 6.** Participants and the Effect Estimates of Potential Risk Factors for Diminished Humoral Immune Response in Each Study

| Study name                     | Risk factor    | Subject with risk factor |             | Published measure of association | Calculated odds ratios from raw data | Published measure of association between risk factor and immune response |                                     | Confounding risk adjustment in multivariable analysis <sup>a</sup>                                                                                                         |
|--------------------------------|----------------|--------------------------|-------------|----------------------------------|--------------------------------------|--------------------------------------------------------------------------|-------------------------------------|----------------------------------------------------------------------------------------------------------------------------------------------------------------------------|
|                                |                | Response                 | No response |                                  |                                      | Univariable (95% CI)                                                     | Multivariable (95% CI)              |                                                                                                                                                                            |
| BNT162b2 vaccine               |                |                          |             |                                  |                                      |                                                                          |                                     |                                                                                                                                                                            |
| Bergman 2021 <sup>7</sup>      | Antimetabolite | 2/32                     | 18/21       | OR                               | 0.01 (0.002, 0.07)                   | 0.013 (0.003-0.051) <sup>b</sup>                                         | 0.011 (0.002-0.048) <sup>b, c</sup> | Creatinine baseline                                                                                                                                                        |
| Cholankeril 2021 <sup>83</sup> | Antimetabolite | 11/33                    | 14/36       |                                  | 0.79 (0.29, 2.11)                    |                                                                          |                                     |                                                                                                                                                                            |
|                                | CNI            | 29/33                    | 35/36       |                                  | 0.21 (0.02, 1.96)                    |                                                                          |                                     |                                                                                                                                                                            |
|                                | Male           | 25/33                    | 23/36       |                                  | 1.77 (0.62, 5.03)                    |                                                                          |                                     |                                                                                                                                                                            |
| Davidov 2021 <sup>21</sup>     | Antimetabolite | 7/55                     | 10/21       |                                  | 0.16 (0.05, 0.52)                    |                                                                          |                                     |                                                                                                                                                                            |
|                                | Male           | 33/55                    | 10/21       |                                  | 1.65 (0.6, 4.54)                     |                                                                          |                                     |                                                                                                                                                                            |
|                                | mTORi          | 6/55                     | 5/21        |                                  | 0.39 (0.11, 1.46)                    |                                                                          |                                     |                                                                                                                                                                            |
| Ducloux 2021 <sup>24</sup>     | Antimetabolite | 26/ 81                   | 55/ 72      | OR                               | 0.15 (0.07, 0.3)                     | 0.13 (0.06-0.27)                                                         | 0.14 (0.05-0.42)                    | Transplant duration, eGFR, CNI, mTORi, MPA, CD4 cell count                                                                                                                 |
|                                | CNI            | 58/ 81                   | 65/ 72      | OR                               | 0.27 (0.11, 0.68)                    | 0.27 (0.11-0.68)                                                         | 1.24 (0.24-6.38)                    |                                                                                                                                                                            |
|                                | Male           | 48/ 81                   | 45/ 72      | OR                               | 0.87 (0.46, 1.67)                    | 1.4 (0.71-2.77)                                                          |                                     |                                                                                                                                                                            |
|                                | mTOR           | 29/ 81                   | 4/ 72       | OR                               | 9.48 (3.14, 28.65)                   | 9.06 (2.99-24.48)                                                        | 1.71 (0.32-9.17)                    |                                                                                                                                                                            |
| Grupper 2021 <sup>28</sup>     | Antimetabolite | 32/ 51                   | 72/ 85      | OR                               | 0.3 (0.13, 0.69)                     |                                                                          | 0.68 (0.44-0.79) <sup>b, c</sup>    | Age, time post-first transplantation, eGFR, triple immunosuppression, high-dose corticosteroid last 12 months, low dose prednisone, maintenance MMF                        |
|                                | ATG            | 1/ 51                    | 9/ 85       |                                  | 0.17 (0.02, 1.37)                    |                                                                          |                                     |                                                                                                                                                                            |
|                                | CNI            | 46/ 51                   | 77/ 85      |                                  | 0.96 (0.3, 3.1)                      |                                                                          |                                     |                                                                                                                                                                            |
|                                | Deceased donor | 14/ 51                   | 38/ 85      |                                  | 0.47 (0.22, 0.99)                    |                                                                          |                                     |                                                                                                                                                                            |
|                                | Male           | 34/ 51                   | 53/ 85      |                                  | 1.21 (0.58, 2.5)                     |                                                                          |                                     |                                                                                                                                                                            |
|                                | mTOR           | 5/ 51                    | 5/ 85       |                                  | 1.74 (0.48, 6.33)                    |                                                                          |                                     |                                                                                                                                                                            |
| Guarino 2021 <sup>29</sup>     | Antimetabolite | 83/ 273                  | 49/ 92      |                                  | 0.38 (0.24, 0.62)                    |                                                                          |                                     |                                                                                                                                                                            |
|                                | CNI            | 227/ 273                 | 72/ 92      |                                  | 1.37 (0.76, 2.47)                    |                                                                          |                                     |                                                                                                                                                                            |
|                                | Male           | 206/ 273                 | 73/ 92      |                                  | 0.8 (0.45, 1.42)                     |                                                                          |                                     |                                                                                                                                                                            |
|                                | mTOR           | 55/ 273                  | 30/ 92      |                                  | 0.52 (0.31, 0.88)                    |                                                                          |                                     |                                                                                                                                                                            |
| Haskin 2021 <sup>32</sup>      | ATG            | 2/ 24                    | 3/ 14       | OR                               | 0.33 (0.05, 2.3)                     |                                                                          | 0.08 (0.013-0.48)                   | Not reported                                                                                                                                                               |
|                                | Deceased donor | 10/ 24                   | 5/ 14       |                                  | 1.29 (0.33, 5.02)                    |                                                                          |                                     |                                                                                                                                                                            |
|                                | Male           | 18/ 24                   | 7/ 14       |                                  | 3 (0.74, 12.13)                      |                                                                          |                                     |                                                                                                                                                                            |
|                                | Rituximab      | 2/ 24                    | 7/ 14       |                                  | 0.09 (0.02, 0.54)                    |                                                                          |                                     |                                                                                                                                                                            |
| Hod 2021 <sup>36</sup>         | Antimetabolite | 27/ 42                   | 69/ 78      |                                  | 0.24 (0.09, 0.6)                     |                                                                          |                                     |                                                                                                                                                                            |
|                                | CNI            | 39/ 42                   | 72/ 78      |                                  | 1.08 (0.26, 4.57)                    |                                                                          |                                     |                                                                                                                                                                            |
|                                | Deceased donor | 4/ 42                    | 18/ 78      |                                  | 0.35 (0.11, 1.12)                    |                                                                          |                                     |                                                                                                                                                                            |
|                                | Male           | 32/ 42                   | 64/ 78      |                                  | 0.7 (0.28, 1.75)                     |                                                                          |                                     |                                                                                                                                                                            |
|                                | mTOR           | 3/ 42                    | 4/ 78       |                                  | 1.42 (0.3, 6.68)                     |                                                                          |                                     |                                                                                                                                                                            |
| Holden 2021 <sup>38</sup>      | Antimetabolite | 23/ 28                   | 52/ 52      |                                  | 0.04 (0.002, 0.77)                   |                                                                          |                                     |                                                                                                                                                                            |
|                                | CNI            | 28/ 28                   | 47/ 52      |                                  | 6.6 (0.35, 123.86)                   |                                                                          |                                     |                                                                                                                                                                            |
|                                | Male           | 14/ 28                   | 30/ 52      |                                  | 0.73 (0.29, 1.85)                    |                                                                          |                                     |                                                                                                                                                                            |
|                                | mTOR           | 1/ 28                    | 1/ 52       |                                  | 1.89 (0.11, 31.4)                    |                                                                          |                                     |                                                                                                                                                                            |
| Korth 2021 <sup>42</sup>       | Antimetabolite | 3/ 5                     | 16/ 18      |                                  | 0.19 (0.02, 1.9)                     |                                                                          |                                     |                                                                                                                                                                            |
|                                | CNI            | 4/ 5                     | 14/ 18      |                                  | 1.14 (0.1, 13.34)                    |                                                                          |                                     |                                                                                                                                                                            |
|                                | Male           | 2/ 5                     | 9/ 18       |                                  | 0.67 (0.09, 4.99)                    |                                                                          |                                     |                                                                                                                                                                            |
|                                | mTOR           | 2/ 5                     | 4/ 18       |                                  | 2.33 (0.28, 19.17)                   |                                                                          |                                     |                                                                                                                                                                            |
| Masset 2021 <sup>47</sup>      | Antimetabolite | 145/ 227                 | 180/ 229    | OR                               | 0.48 (0.32, 0.73)                    |                                                                          | 0.17 (0.09-0.33) <sup>b</sup>       | Recipient age at vaccination, transplantation ≤ 4 years, allograft function by MDRD equation, CNI, mTOR, antimetabolite, steroids, lymphocyte count < 1500/mm <sup>3</sup> |
|                                | CNI            | 178/ 227                 | 191/ 229    | OR                               | 0.72 (0.45, 1.16)                    |                                                                          | 0.65 (0.3-1.37) <sup>b</sup>        |                                                                                                                                                                            |
|                                | Deceased donor | 180/ 227                 | 196/ 229    |                                  | 0.65 (0.4, 1.05)                     |                                                                          |                                     |                                                                                                                                                                            |
|                                | Male           | 145/ 227                 | 130/ 229    |                                  | 1.35 (0.92, 1.96)                    |                                                                          |                                     |                                                                                                                                                                            |
|                                | mTOR           | 48/ 227                  | 20/ 229     | OR                               | 2.8 (1.6, 4.9)                       |                                                                          | 1.37 (0.62-3.03) <sup>b</sup>       |                                                                                                                                                                            |

|                                     |                                                                       |                                                              |                                                                 |                |                                                                                                                           |                                                                                                |                                                                 |                                                                                                                                  |  |
|-------------------------------------|-----------------------------------------------------------------------|--------------------------------------------------------------|-----------------------------------------------------------------|----------------|---------------------------------------------------------------------------------------------------------------------------|------------------------------------------------------------------------------------------------|-----------------------------------------------------------------|----------------------------------------------------------------------------------------------------------------------------------|--|
| Mazzola 2021 <sup>49</sup>          | Antimetabolite<br>CNI<br>Male<br>mTOR                                 | 24/ 38<br>31/ 38<br>28/ 38<br>8/ 38                          | 71/ 95<br>78/ 95<br>64/ 95<br>18/ 95                            |                | 0.58 (0.26, 1.3)<br>0.97 (0.37, 2.56)<br>1.36 (0.59, 3.14)<br>1.14 (0.45, 2.9)                                            |                                                                                                |                                                                 | Not reported                                                                                                                     |  |
| Midtvedth 2021 <sup>52</sup>        | Antimetabolite<br>Deceased donor<br>Male                              | 9/ 25<br>11/ 25<br>12/ 25                                    | 106/ 116<br>75/ 116<br>67/ 116                                  |                | 0.05 (0.02, 0.15)<br>0.43 (0.18, 1.03)<br>0.68 (0.28, 1.61)                                                               |                                                                                                |                                                                 |                                                                                                                                  |  |
| Pedersen 2021 <sup>56</sup>         | CNI<br>Deceased donor<br>Male<br>mTOR                                 | 18/ 18<br>6/ 18<br>9/ 18<br>0/ 18                            | 36/ 40<br>23/ 40<br>15/ 40<br>1/ 40                             |                | 4.56 (0.23, 89.34)<br>0.37 (0.12, 1.18)<br>1.67 (0.54, 5.13)<br>0.71 (0.03, 18.32)                                        |                                                                                                |                                                                 |                                                                                                                                  |  |
| Peled 2021 <sup>57</sup>            | Antimetabolite<br>Male<br>mTOR                                        | 5/ 14<br>9/ 14<br>9/ 14                                      | 53/ 63<br>41/ 63<br>11/ 63                                      | OR             | 0.11 (0.03, 0.38)<br>0.97 (0.29, 3.24)<br>8.51 (2.39, 30.36)                                                              |                                                                                                | 4.3 (0.66-30.76) <sup>b,c</sup>                                 | Mycophenolic acid therapy, age, sex, everolimus therapy, lymphocyte absolute, duration from heart transplant to antibody testing |  |
| Predecki 2021 <sup>59</sup>         | Male                                                                  |                                                              |                                                                 | OR             | -                                                                                                                         | 1.04 (0.68-1.59)                                                                               |                                                                 |                                                                                                                                  |  |
| Rabinowich 2021 <sup>61</sup>       | Antimetabolite<br>CNI<br>Male<br>mTOR                                 | 18/ 38<br>35/ 39<br>28/ 38<br>11/ 38                         | 26/ 42<br>40/ 42<br>28/ 42<br>9/ 42                             | OR             | 0.55 (0.23, 1.35)<br>0.44 (0.08, 2.54)<br>1.4 (0.53, 3.68)<br>1.49 (0.54, 4.13)                                           |                                                                                                | 0.56 (0.29-0.87) <sup>b,c</sup>                                 | Age, eGFR, high dose steroid during the last 12 months, triple immunosuppression, low dose prednisone, MMF                       |  |
| Rashidi-Alavijeh 2021 <sup>62</sup> | Antimetabolite<br>CNI<br>Male<br>mTOR                                 | 5/ 34<br>31/ 34<br>20/ 34<br>20/ 34                          | 6/ 9<br>9/ 9<br>6/ 9<br>3/ 9                                    |                | 0.09 (0.02, 0.46)<br>0.47 (0.02, 10.01)<br>0.71 (0.15, 3.35)<br>2.86 (0.61, 13.4)                                         |                                                                                                |                                                                 |                                                                                                                                  |  |
| Rozen-Zvi 2021 <sup>65</sup>        | Antimetabolite<br>ATG<br>Deceased donor<br>Male<br>mTOR<br>Rituximab  | 66/ 112<br>3/ 112<br>21/ 112<br>76/ 112<br>10/ 112<br>0/ 112 | 160/ 196<br>11/ 196<br>53/ 196<br>121/ 196<br>16/ 196<br>6/ 196 | OR             | 0.32 (0.19, 0.54)<br>0.46 (0.13, 1.7)<br>0.62 (0.35, 1.1)<br>1.31 (0.8, 2.14)<br>1.1 (0.48, 2.52)<br>0.13 (0.01, 2.33)    | 0.463 (0.126-1.696)                                                                            |                                                                 |                                                                                                                                  |  |
| Russo 2021 <sup>67</sup>            | Antimetabolite<br>Male<br>mTOR                                        | 24/ 43<br>24/ 43<br>6/ 43                                    | 33/ 39<br>23/ 39<br>4/ 39                                       | OR             | 0.23 (0.08, 0.66)<br>0.88 (0.37, 2.11)<br>1.42 (0.37, 5.46)                                                               |                                                                                                | 0.19 (0.06-0.59) <sup>b</sup>                                   | Age                                                                                                                              |  |
| Shostak 2021 <sup>74</sup>          | Antimetabolite<br>Male<br>mTOR                                        | 25/ 31<br>21/ 31<br>1/ 31                                    | 28/ 137<br>91/ 137<br>28/ 137                                   | OR<br>OR<br>OR | 0.26 (0.08, 0.81)<br>1.06 (0.46, 2.44)<br>0.13 (0.02, 0.99)                                                               | 0.25 (0.08-0.8)<br>0.94 (0.41-2.16)<br>0.13 (0.02-0.99)                                        |                                                                 |                                                                                                                                  |  |
| mRNA-1273 vaccine                   |                                                                       |                                                              |                                                                 |                |                                                                                                                           |                                                                                                |                                                                 |                                                                                                                                  |  |
| Benotmane 2021 <sup>5</sup>         | Antimetabolite<br>CNI<br>Deceased donor<br>Male<br>mTOR               | 76/ 98<br>89/ 98<br>79/ 98<br>64/ 98<br>18/ 98               | 91/ 106<br>84/ 106<br>84/ 106<br>66/ 106<br>9/ 106              |                | 0.57 (0.28, 1.17)<br>2.59 (1.13, 5.95)<br>1.09 (0.55, 2.16)<br>1.14 (0.64, 2.02)<br>2.43 (1.03, 5.69)                     |                                                                                                |                                                                 |                                                                                                                                  |  |
| Crespo 2021 <sup>17</sup>           | Antimetabolite<br>CNI<br>Male                                         |                                                              |                                                                 | OR<br>OR<br>OR | -<br>-<br>-                                                                                                               | 0.68 (0.28-1.61) <sup>b</sup><br>0.39 (0.04-3.7) <sup>b</sup><br>0.53 (0.22-1.27) <sup>b</sup> |                                                                 |                                                                                                                                  |  |
| Cucchiari 2021 <sup>18</sup>        | ATG<br>mTOR                                                           |                                                              |                                                                 | OR<br>OR       | -<br>-                                                                                                                    | 0.14 (0.02-1.14) <sup>b</sup><br>2.86 (1.12-7.69) <sup>b</sup>                                 | 0.17 (0.02-1.59) <sup>b</sup><br>3.57 (1.12-11.11) <sup>b</sup> | Age, baseline immunosuppression, ATG, eGFR                                                                                       |  |
| Sanders 2021 <sup>69</sup>          | Antimetabolite<br>CNI<br>Deceased donor<br>Male<br>mTORi<br>Rituximab | 116/164<br>127/164<br>56/164<br>96/164<br>14/164<br>1/164    | 115/124<br>109/124<br>51/124<br>64/124<br>3/124<br>1/124        | OR             | 0.19 (0.09, 0.4)<br>0.47 (0.25, 0.91)<br>0.74 (0.46, 1.2)<br>1.32 (0.83, 2.12)<br>3.76 (1.06, 13.4)<br>0.76 (0.05, 12.18) |                                                                                                | 3.82 (1.07-13.6)                                                |                                                                                                                                  |  |

|                                   |                |        | BNT162b2 vaccine or mRNA-1273 vaccine |    |                    |  |                  |                                                                                                               |
|-----------------------------------|----------------|--------|---------------------------------------|----|--------------------|--|------------------|---------------------------------------------------------------------------------------------------------------|
| D'Offizi 2021 <sup>19</sup>       | Antimetabolite | 17/47  | 13/14                                 |    | 0.04 (0.01, 0.36)  |  |                  |                                                                                                               |
| Debska-Slizien 2021 <sup>22</sup> | Antimetabolite | 52/73  | 60/69                                 |    | 0.37 (0.16, 0.88)  |  |                  |                                                                                                               |
|                                   | Deceased donor | 69/73  | 64/69                                 |    | 1.35 (0.35, 5.24)  |  |                  |                                                                                                               |
|                                   | Male           | 44/73  | 39/69                                 |    | 1.17 (0.6, 2.28)   |  |                  |                                                                                                               |
| Kantauskaite 2021 <sup>41</sup>   | Antimetabolite | 28/ 56 | 163/ 169                              | OR | 0.04 (0.01, 0.1)   |  | 1.48 (0.64-3.41) | Age, gender, eGFR, time after transplantation, no use of MMF, no use of CNI, no use of steroids, dual therapy |
|                                   | CNI            | 54/ 56 | 163/ 169                              |    | 0.99 (0.2, 5.07)   |  |                  |                                                                                                               |
|                                   | Male           | 35/ 56 | 113/ 169                              |    | 0.83 (0.44, 1.55)  |  |                  |                                                                                                               |
|                                   | mTOR           | 4/ 56  | 3/ 169                                |    | 4.26 (0.92, 19.64) |  |                  |                                                                                                               |
| Villanego 2021 <sup>78</sup>      | Antimetabolite | 45/ 57 | 33/ 34                                | OR | 0.11 (0.01, 0.92)  |  | 0.08 (0.01-0.53) | Age, time from kidney transplant to COVID-19 vaccine, serum creatinine, MPA                                   |
|                                   | ATG            | 2/ 57  | 3/ 34                                 |    | 0.38 (0.06, 2.37)  |  |                  |                                                                                                               |
|                                   | CNI            | 51/ 57 | 33/ 34                                |    | 0.26 (0.03, 2.24)  |  |                  |                                                                                                               |
|                                   | Male           | 42/ 57 | 19/ 34                                |    | 2.21 (0.9, 5.42)   |  |                  |                                                                                                               |
|                                   | mTOR           | 8/ 57  | 2/ 34                                 |    | 2.61 (0.52, 13.1)  |  |                  |                                                                                                               |
|                                   | Rituximab      | 0/ 57  | 1/ 34                                 |    | 0.19 (0.01, 4.9)   |  |                  |                                                                                                               |

ATG: Anti-thymocyte globulin; CNI: Calcineurin inhibitor;; eGFR: estimated glomerular filtration rate; MDRD- Modification of Diet in Renal Disease; MMF: Mycophenolate mofetil; MPA: Mycophenolic acid; mTOR: mammalian (mechanistic) target of rapamycin; OR: odd ratio; RR: relative risk; CI: confidence interval

a: Multivariable ORs in each primary study were derived from the same regression model

b: Odd ratio of non-response of humoral immunity was transformed to odd ratio of response of humoral immunity by log transformation

c: These values were not used to calculate the pooled odds ratios in meta-analysis due to significant symmetry issues.



**eTable 7.** Continuous Data of Potential Risk Factors for Diminished Humoral Immune Response

| Study                                                 | Number of patients for analysis | Age (years)                                                                        | Duration after transplantation (years)                                          | BMI (kg/m <sup>2</sup> )                                                           | Lymphocyte count (x10 <sup>3</sup> /mm <sup>3</sup> ) |
|-------------------------------------------------------|---------------------------------|------------------------------------------------------------------------------------|---------------------------------------------------------------------------------|------------------------------------------------------------------------------------|-------------------------------------------------------|
| Alejo 2021 <sup>1</sup>                               | 18                              | Median (IQR)<br>58 (50-65)                                                         | Median (IQR)<br>7.1 (2.3-16.2)                                                  | -                                                                                  | -                                                     |
| Azzi 2021 <sup>2</sup>                                | 76                              | Median (IQR)<br>Responder<br>58 (41-70)<br>Non-responder<br>63 (54-69)             | Median (range)<br>4 (0.25-22)                                                   | Median (IQR)<br>Responder<br>30.3 (25.5-34.3)<br>Non-responder<br>29.5 (23.7-32.4) | -                                                     |
| Ben Zadok 2021 <sup>3</sup>                           | 37                              | Median (IQR)<br>Responder<br>46 (34-63)<br>Non-responder<br>68 (59-70)             | Median (IQR)<br>Responder<br>7 (2.7-14.5)<br>Non-responder<br>9.9 (1.1-13.5)    | -                                                                                  | -                                                     |
| Benotmane 2021 (1 dose Moderna) <sup>4</sup>          | 241                             | Median (IQR)<br>Responder<br>58.4 (43.3-66.9)<br>Non-responder<br>57.7 (49.6-67.7) | Median (IQR)<br>Responder<br>15.4 (8.6-25.9)<br>Non-responder<br>5.8 (2.8-11.9) | Median (IQR)<br>Responder<br>26.4 (21.9-29.9)<br>Non-responder<br>25.7 (22.8-29.4) | -                                                     |
| Benotmane 2021 (2 doses Moderna) <sup>5</sup>         | 204                             | Median (IQR)<br>Responder<br>57.3 (46.9-66.2)<br>Non-responder<br>58 (51-67.7)     | Median (IQR)<br>Responder<br>7.1 (3.8-14.7)<br>Non-responder<br>5.4 (2.4 -12)   | Median (IQR)<br>Responder<br>25.9 (22.6-29.9)<br>Non-responder<br>25.4 (22.3-27.6) | -                                                     |
| Benotmane 2021 (3 doses) <sup>6</sup>                 | 159                             | Median (IQR)<br>57.6 (49.6-66.1)                                                   | Median (IQR)<br>5.3 (1.9-11.1)                                                  | -                                                                                  | -                                                     |
| Bertrand 2021 <sup>8</sup>                            | 45                              | Mean (SD)<br>63.5 (16.3)                                                           | Median<br>6.9 (range 0.2-30.2)                                                  | Mean (SD)<br>26.2 (4.7)                                                            | Mean (SD)<br>0.447 (0.263)                            |
| Bertrand 2021 <sup>9</sup>                            | 235                             | Mean (SD)<br>60.8 (15.1)                                                           | -                                                                               | -                                                                                  | -                                                     |
| Bertrand 2021 (3 doses) <sup>10</sup>                 | 80                              | Mean (SD)<br>63.6 (15.7)                                                           | Median (IQR)<br>7.3 (3.4-14.1)                                                  | -                                                                                  | -                                                     |
| Boyarsky 2021 (1 dose of mRNA vaccines) <sup>11</sup> | 436                             | Median (IQR)<br>55.9 (41.3-67.4)                                                   | Median (IQR)<br>6.2 (2.7-12.7)                                                  | -                                                                                  | -                                                     |
| Cao 2021 <sup>14</sup>                                | 37                              | Median (IQR)<br>64 (50-69)                                                         | -                                                                               | -                                                                                  | -                                                     |
| Chavarot 2021 <sup>15</sup>                           | 101                             | Median (IQR)<br>64 (53-73)                                                         | Median (IQR)<br>4.9 (2.4-8.7)                                                   | -                                                                                  | -                                                     |
| Chavarot 2021 (3 doses) <sup>16</sup>                 | 62                              | Median (IQR)<br>Responder<br>51.5 (42-58)                                          | -                                                                               | -                                                                                  | -                                                     |

|                                           |     |                                                                        |                                                                              |                                                                                    |                                                                     |
|-------------------------------------------|-----|------------------------------------------------------------------------|------------------------------------------------------------------------------|------------------------------------------------------------------------------------|---------------------------------------------------------------------|
|                                           |     | Non-responder<br>64 (51.5-72)                                          |                                                                              |                                                                                    |                                                                     |
| Cholankeril 2021 <sup>83</sup>            | 69  | Median (IQR)<br>Responder<br>62 (50-66)<br>Non-responder<br>64 (52-69) | Median (IQR)<br>Responder<br>5 (3.2-8.6)<br>Non-responder<br>2.2 (0.9-4.7)   | -                                                                                  | -                                                                   |
| Crespo 2021 <sup>17</sup>                 | 90  | Mean (SD)<br>59.7 (12.5)                                               | -                                                                            | Mean (SD)<br>27.7 (5.9)                                                            | -                                                                   |
| Cucchiari 2021 <sup>18</sup>              | 148 | Mean (SD)<br>57.6 (14.3)                                               | Median (IQR)<br>1.7 (0.8-4.9)                                                | Mean (SD)<br>25.6 (4.2)                                                            | -                                                                   |
| D'Offizi 2021 <sup>19</sup>               | 61  | Median (IQR)<br>59 (56-61)                                             | Median (IQR)<br>6 (3-10)                                                     | -                                                                                  | -                                                                   |
| Danthu 2021 <sup>20</sup>                 | 74  | Mean (SD)<br>64.8 (11.5)                                               | Mean (SD)<br>6.4 (7.8)                                                       | Mean (SD)<br>26.7 (5.8)                                                            | Mean (SD)<br>1.630 (1250)                                           |
| Davidov 2021 <sup>21</sup>                | 76  | Median (IQR)<br>Responder<br>60 (46-69)<br>Non-responder<br>68 (61-71) | Median (IQR)<br>Responder<br>12 (4-17)<br>Non-responder<br>8 (3-11)          | Median (IQR)<br>Responder<br>25 (22-28)<br>Non-responder<br>25 (23-28)             | -                                                                   |
| Debska-Slizien 2021 <sup>22</sup>         | 142 | Median (IQR)<br>Responder<br>48 (40-61)<br>Non-responder<br>58 (50-66) | Median (IQR)<br>Responder<br>10 (6-19)<br>Non-responder<br>7 (2.5-12)        | Median (IQR)<br>Responder<br>25.0 (23.1-28.4)<br>Non-responder<br>25.4 (22.5-28.4) | -                                                                   |
| Del Bello 2021 <sup>23</sup>              | 396 | Mean (SD)<br>59 (15)                                                   | -                                                                            | -                                                                                  | -                                                                   |
| Ducloux 2021 <sup>24</sup>                | 153 | Median (IQR)<br>Responder<br>63 (54-72)<br>Non-responder<br>64 (57-71) | Median (IQR)<br>Responder<br>13.17 (5-16.17)<br>Non-responder<br>2.3 (1.3-7) | -                                                                                  | -                                                                   |
| Firket 2021 <sup>25</sup>                 | 10  | Mean (SD)<br>49.7(13.8)                                                | -                                                                            | Mean (SD)<br>26.45 (3.84)                                                          | -                                                                   |
| Georgery 2021<br>(1st dose) <sup>26</sup> | 78  | Median (range)<br>62 (18-84)                                           | Median (range)<br>9.7 (0.33-50.7)                                            | -                                                                                  | -                                                                   |
| Georgery 2021<br>(2nd dose) <sup>27</sup> | 79  | Median (range)<br>61 (18-88)                                           | Median (range)<br>8.8 (0.3-50.8)                                             | -                                                                                  | -                                                                   |
| Grupper 2021 <sup>28</sup>                | 136 | Mean (SD)<br>Responder<br>54.6 (12.8)<br>Non-responder<br>60.9 (12.2)  | Mean (SD)<br>Responder<br>5.7 (5.8)<br>Non-responder<br>4.1 (4.6)            | Mean (SD)<br>Responder<br>27.4 (3.9)<br>Non-responder<br>26.7 (4.2)                | Mean (SD)<br>Responder<br>2.27 (0.8)<br>Non-responder<br>1.83 (0.9) |

|                                                 |            |                                                                                                                                  |                                                                                                                              |                                                                                |                                                                       |
|-------------------------------------------------|------------|----------------------------------------------------------------------------------------------------------------------------------|------------------------------------------------------------------------------------------------------------------------------|--------------------------------------------------------------------------------|-----------------------------------------------------------------------|
| Guarino 2021 <sup>29</sup>                      | 365        | Mean (SD)<br>Responder<br>61.7 (13.9)<br>Non-responder<br>65 (9.3)                                                               | Mean (SD)<br>Responder<br>14.8 (8.8)<br>Non-responder<br>11.9 (8.7)                                                          | Mean (SD)<br>Responder<br>26.8 (4.59)<br>Non-responder<br>27.7 (7.09)          | -                                                                     |
| Hall 2021 <sup>30</sup>                         | 127        | Median (IQR)<br>Responder<br>67.8 (54.3-71.8)<br>Non-responder<br>65.9 (63.4-70.1)<br>[responder vs non-responder after 2 doses] | Median (IQR)<br>Responder<br>2.63 (1.4-6.9)<br>Non-responder<br>2.83 (1.5-5.8)<br>[responder vs non-responder after 2 doses] | -                                                                              | -                                                                     |
| Hall 2021 (3 doses) <sup>31</sup>               | 60         | Median (IQR)<br>66.9 (64.0-71.8)                                                                                                 | Median (IQR)<br>3.57 (2-6.8)                                                                                                 | -                                                                              | Median (IQR)<br>1.15 (0.90-1.60)                                      |
| Haskin 2021 <sup>32</sup>                       | 38         | Mean (SD)<br>Responder<br>19.1 (2.9)<br>Non-responder<br>17.9 (2.6)                                                              | Mean (SD)<br>Responder<br>8.2 (5.8)<br>Non-responder<br>5.9 (5.2)                                                            | -                                                                              | -                                                                     |
| Havlin 2021 <sup>33</sup>                       | 48         | Mean (SD)<br>52.1 (14.3)                                                                                                         | Median (range)<br>4.25 (0.3-20.1)                                                                                            | -                                                                              | -                                                                     |
| Havlin 2021 3rd dose <sup>34</sup>              |            | Median (IQR)<br>56.2 (54-60)                                                                                                     | Median (IQR)<br>3.5 (2.4-6.8)                                                                                                | -                                                                              | -                                                                     |
| Herrera 2021 <sup>35</sup>                      | 46 (Heart) | Median (IQR)<br>60 (20-80)                                                                                                       | Median (IQR)<br>6.3 (0.4-21)                                                                                                 | Median (IQR)<br>24.8 (18-36.5)                                                 | -                                                                     |
|                                                 | 58 (Liver) | 61.5 (18-88)                                                                                                                     | 4.6 (0.3-26.8)                                                                                                               | 26.3 (17-42)                                                                   | -                                                                     |
| Hoffman 2021 <sup>37</sup>                      | 15         | -                                                                                                                                | Median (IQR)<br>5.35 (1.87-9.71)                                                                                             | -                                                                              | -                                                                     |
| Hall 2021 (3 doses) <sup>31</sup>               | 120        | Mean (SD)<br>Responder<br>58.17 (12.7)<br>Non-responder<br>60.6 (13.2)                                                           | Mean (SD)<br>Responder<br>5.5 (6.0)<br>Non-responder<br>6.0 (6.5)                                                            | Mean (SD)<br>Responder<br>28.5 (4.84)<br>Non-responder<br>27.13 (5.04)         | Mean (SD)<br>Responder<br>1.86 (0.51)<br>Non-responder<br>2.14 (1.76) |
| Holden 2021 <sup>38</sup>                       | 80         | Mean (IQR)<br>Responder<br>52.9 (44.9-61.5)<br>Non-responder<br>60.2 (51.7-68.6)                                                 | Mean (IQR)<br>Responder<br>9.55 (4.8-16)<br>Non-responder<br>6.7 (3.15-14)                                                   | Mean (IQR)<br>Responder<br>27.6 (23.5-31.5)<br>Non-responder<br>26 (22.5-28.3) | -                                                                     |
| Kamar 2021 <sup>39</sup>                        | 101        | Mean (SD)<br>58 (2)                                                                                                              | -                                                                                                                            | -                                                                              | -                                                                     |
| Kamar 2021 (4 <sup>th</sup> dose) <sup>40</sup> | 37         | Mean (SEM)<br>Responder<br>60 (14)                                                                                               | Mean (SD)<br>Responder<br>13.4 (8.1)                                                                                         | -                                                                              | Mean (SD)<br>Responder<br>1.4 (0.9)                                   |

|                                         |                                                                                 |                                                                                                                                                |                                                                                                                                            |                                                                                                                                              |                               |
|-----------------------------------------|---------------------------------------------------------------------------------|------------------------------------------------------------------------------------------------------------------------------------------------|--------------------------------------------------------------------------------------------------------------------------------------------|----------------------------------------------------------------------------------------------------------------------------------------------|-------------------------------|
|                                         |                                                                                 | Non-responder<br>58 (16)                                                                                                                       | Non-responder<br>6.6 (5.5)                                                                                                                 |                                                                                                                                              | Non-responder<br>0.9 (0.4)    |
| Kantauskaite 2021 <sup>41</sup>         | 225                                                                             | Median (IQR)<br>62 (54-70)<br>Responder<br>61 (57-68)<br>Non-responder<br>62 (53-70)                                                           | Median (IQR)<br>6.8 (2.6-12.3)<br>Responder<br>12.5 (7.8-18.9)<br>Non-responder<br>4.7 (2.2-10.3)                                          | -                                                                                                                                            | -                             |
| Korth 2021 <sup>42</sup>                | 23                                                                              | Mean (SD) Responder<br>57.0 (8.1)<br>Non-responder<br>57.9 (14.9)                                                                              | Mean (SD) Responder<br>17.6 (7.7)<br>Non-responder<br>9.7 (9.1)                                                                            | -                                                                                                                                            | -                             |
| Kumar 2021<br>(3rd dose) <sup>43</sup>  | 60                                                                              | Median (IQR)<br>66.9 (64-71.8)                                                                                                                 | Median (IQR)<br>3.6 (2-6.8)                                                                                                                | -                                                                                                                                            | Median (IQR)<br>1.2 (0.9-1.6) |
| Marinaki 2021 <sup>44</sup>             | 34                                                                              | Median (IQR)<br>60 (49.1-68.4)                                                                                                                 | Median (IQR)<br>11.1 (7.3-15.8)                                                                                                            | Mean (SD)<br>Responder<br>25.4 (5)<br>Non-responder<br>25.5 (4.8)<br>[Responder was defined<br>by positive Ab test after<br>the second dose] | -                             |
| Marion 2021 <sup>45</sup>               | 576                                                                             | Mean (SE) of patients<br>with Ab test after the<br>second dose<br>59 (1)                                                                       | -                                                                                                                                          | Median (IQR)<br>Responder<br>58.8 (22.3-28.2)<br>Non-responder<br>24.8 (22.6-28.5)                                                           | -                             |
| Massa 2021<br>(3rd dose) <sup>46</sup>  | 61                                                                              | Median (IQR)<br>58 (47.1-66.1)                                                                                                                 | Median (IQR)<br>4.5 (1.8-11.3)                                                                                                             | -                                                                                                                                            | Median (IQR)<br>1.3 (0.8-1.7) |
| Masset 2021 <sup>47</sup>               | 456                                                                             | Mean (SD)<br>Responder<br>60.2 (13)<br>Non-responder<br>62.7 (11.1)<br>[Responder was defined<br>by positive Ab test after<br>the second dose] | Mean (SD) Responder<br>12.4 (8.9)<br>Non-responder<br>8.5 (7.6)<br>[Responder was defined by<br>positive Ab test after the<br>second dose] | -                                                                                                                                            | -                             |
| Masset 2021<br>(3rd dose) <sup>48</sup> | 28<br>(AZD1222- AZD1222 -<br>mRNA vaccine or<br>AZD1222- mRNA-<br>mRNA vaccine) | Mean(SD)<br>58.7 (13.3)                                                                                                                        | Mean(SD)<br>8.2 (6.2)                                                                                                                      | -                                                                                                                                            | Mean(SD)<br>1.8 (0.8)         |
|                                         | 56<br>3 mRNA vaccine                                                            | Mean(SD)<br>58.7 (12)                                                                                                                          | Mean(SD)<br>8.5 (7.4)                                                                                                                      | -                                                                                                                                            | Mean(SD)<br>1.7 (1)           |

|                                    |     |                                                                                  |                                                                                  |                                                                                      |                                                                     |
|------------------------------------|-----|----------------------------------------------------------------------------------|----------------------------------------------------------------------------------|--------------------------------------------------------------------------------------|---------------------------------------------------------------------|
| Mazzola 2021 <sup>49</sup>         | 143 | Median (IQR)<br>61 (55-67)                                                       | Median (IQR)<br>3.75 (1.83-8.83)                                                 | Mean (SD)<br>Responder<br>25.6 (3.8)<br>Non-responder<br>25.1 (4.4)                  | -                                                                   |
| Medina-Pestana 2021 <sup>50</sup>  | 942 | Median (IQR)<br>50 (43-56)                                                       | Median (IQR)<br>6 (3-11)                                                         | -                                                                                    | -                                                                   |
| Midtvedth 2021 <sup>52</sup>       | 141 | Mean (SD)<br>Responder<br>59.1 (19.7)<br>Non-responder<br>69.1 (16.2)            | Mean (SD)<br>Responder<br>17.1 (13.5)<br>Non-responder<br>10.4 (8.4)             | -                                                                                    | -                                                                   |
| Miele 2021 <sup>53</sup>           | 16  | Mean (SD)<br>57 (15.9)                                                           | Median (SD)<br>9 (7.5)                                                           | -                                                                                    | -                                                                   |
| Narasimhan 2021 <sup>54</sup>      | 73  | Median (IQR)<br>65 (53.5-69.5)                                                   | Median (IQR)<br>3.33 (1.6-5.3)                                                   | -                                                                                    | -                                                                   |
| Noble 2021 <sup>55</sup>           | 57  | Mean (SD)<br>62 (13)                                                             | -                                                                                | -                                                                                    | -                                                                   |
| Pedersen 2021 <sup>56</sup>        | 58  | Median (IQR)<br>Responder<br>48.0 (42.3-61.4)<br>Non-responder<br>60.9 (53-67.4) | Median (IQR)<br>Responder<br>9.40 (4.5-12.9)<br>Non-responder<br>5.65 (2.3-14.1) | Median (IQR)<br>Responder<br>28.25 (25.1-31.6)<br>Non-responder<br>26.10 (22.4-29.6) | -                                                                   |
| Peled 2021 <sup>57</sup>           | 77  | Median (IQR)<br>Responder<br>61.5 (47.8-68)<br>Non-responder<br>62.0 (49.5-68.5) | -                                                                                | Mean (SD)<br>Responder<br>28.4 (6.6)<br>Non-responder<br>26.1 (5.1)                  | Mean (SD)<br>Responder<br>1.5 (0.6)<br>Non-responder<br>1.4 (0.7)   |
| Peled 2021 (3 doses) <sup>58</sup> | 96  | Median (IQR)<br>Responder<br>58 (47-68)<br>Non-responder<br>65 (58.8-70.3)       | Median (IQR)<br>6.3 (3.5-13.6)                                                   | Mean (SD)<br>Responder<br>26.9 (4.0)<br>Non-responder<br>26.8 (5.9)                  | -                                                                   |
| Predecki 2021 <sup>59</sup>        | 768 | -                                                                                | -                                                                                | Mean (SD)<br>Responder<br>26.8 (5.6)<br>Non-responder<br>25.83 (3.9)                 | Mean (SD)<br>Responder<br>1.75 (0.7)<br>Non-responder<br>1.59 (0.8) |
| Rabinowich 2021 <sup>61</sup>      | 80  | Mean (SD)<br>Responder<br>57.8 (11.9)<br>Non-responder<br>63.2 (11.9)            | Mean (SD)<br>Responder<br>7.43 (5.53)<br>Non-responder<br>5.98 (5.9)             | -                                                                                    | -                                                                   |

|                                     |                 |                                                                              |                                                                             |                                                                                 |                                                                            |
|-------------------------------------|-----------------|------------------------------------------------------------------------------|-----------------------------------------------------------------------------|---------------------------------------------------------------------------------|----------------------------------------------------------------------------|
| Rashidi-Alavijeh 2021 <sup>62</sup> | 43              | Median (IQR)<br>Responder<br>56.5 (46-64)<br>Non-responder<br>59 (53.5-64.5) | Median (IQR)<br>Responder<br>6.5 (3.7-12)<br>Non-responder<br>12 (5.5-14.5) | -                                                                               | -                                                                          |
| Rahav 2021 <sup>63</sup>            | 80<br>(Heart)   | Median (IQR)<br>61.5 (50.0-68.0)                                             | Median (IQR)<br>7.4 (3.3-15.1)                                              | -                                                                               | -                                                                          |
|                                     | 111<br>(Kidney) | Median (IQR)<br>60 (49.0-70.0)                                               | Median (IQR)<br>3.1 (1.0-9.2)                                               | -                                                                               | -                                                                          |
|                                     | 36<br>(Liver)   | Median (IQR)<br>68 (51.0-71.0)                                               | Median (IQR)<br>7 (4.0-16.0)                                                | -                                                                               | -                                                                          |
| Rincon-Arevalo 2021 <sup>64</sup>   | 40              | Median (IQR)<br>62.4 (51.3-69.5)                                             | Median (IQR)<br>5.0 (2.0-10.0)                                              | Mean (SD)<br>Responder<br>26.84 (4.38)<br>Non-responder<br>26.94 (4.77)         | -                                                                          |
| Rozen-Zvi 2021 <sup>65</sup>        | 308             | Mean (SD)<br>Responder<br>53.7 (14.5)<br>Non-responder<br>59.7 (13)          | Mean (SD)<br>Responder<br>7.1 (7.2)<br>Non-responder<br>7.1 (7.8)           | Mean (SD)<br>Responder<br>26.8 (5.6)<br>Non-responder<br>25.83 (3.9)            | Mean (SD)<br>Responder<br>1.75 (0.7)<br>Non-responder<br>1.59 (0.8)        |
| Ruether 2021 <sup>66</sup>          | 138             | Mean (SD)<br>55 (13.2)                                                       | Median (IQR)<br>7 (2-17)                                                    | Median (IQR)<br>24.8 (22.4-28.5)                                                | Median (IQR)<br>950 (667-1,404)                                            |
| Russo 2021 <sup>67</sup>            | 82              | Median (IQR)<br>58.5 (50.3-65)                                               | Median (IQR)<br>5.75 (2.9-11.9)                                             | Median (IQR)<br>Responder 26.8 (23.0-28.8)<br>Non-responder<br>25.2 (22.9-27.8) | -                                                                          |
| Sadioglu 2021 <sup>68</sup>         | 85              | Mean (SD)<br>Responder<br>38 (12)<br>Non-responder<br>48 (11)                | Mean (SD)<br>Responder<br>5.8 (3.5)<br>Non-responder<br>7.2 (6)             | -                                                                               | -                                                                          |
| Sanders 2021 <sup>69</sup>          | 288             | Mean (SD)<br>Responder<br>53.5 (14)<br>Non-responder<br>59.5 (13.2)          | -                                                                           | Mean (SD)<br>Responder<br>27 (4.6)<br>Non-responder<br>26.8 (4.7)               | Median (IQR)<br>Responder<br>1.3 (1-1.9)<br>Non-responder<br>1.1 (0.8-1.7) |
| Sattler 2021 <sup>70</sup>          | 39              | Mean (SD)<br>57.4 (14)                                                       | Mean (SD)<br>8.2 (6.1)                                                      | -                                                                               | -                                                                          |
| Schmidt 2021 <sup>71</sup>          | 40              | Mean (SD)<br>54.5 (12.7)                                                     | Median<br>6.5                                                               | -                                                                               | Median<br>1.43                                                             |
| Schramm 2021 <sup>72</sup>          | 50              | Mean (SD)<br>55 (10)                                                         | Median (IQR)<br>1.89 (1.4-2.4)                                              | -                                                                               | -                                                                          |

|                                                         |                                           |                                                                              |                                                                             |                         |   |
|---------------------------------------------------------|-------------------------------------------|------------------------------------------------------------------------------|-----------------------------------------------------------------------------|-------------------------|---|
| Schrezenmeier 2021 (3 <sup>rd</sup> dose) <sup>73</sup> | 25                                        | Mean (SD)<br>59.7 (13.8)                                                     | -                                                                           | -                       | - |
| Shostak 2021 <sup>74</sup>                              | 168                                       | Median (IQR)<br>Responder<br>57 (36-63)<br>Non-responder<br>61 (51-68.5)     | -                                                                           | -                       | - |
| Stumpf 2021 (Subanalysis of DIAVAC) <sup>75</sup>       | 71                                        | Overall<br>Mean (SD)<br>57 (14.4)                                            | Overall<br>Mean (SD)<br>7.5 (6)                                             | -                       | - |
| Stumpf 2021 <sup>76</sup>                               | 368                                       | Mean (SD)<br>57.3 (13.7)                                                     | Mean (SD)<br>9.9 (6.8)                                                      | Mean (SD)<br>26.4 (4.8) | - |
| Thuluvath 2021 <sup>77</sup>                            | 62                                        | Mean (SD)<br>65.7 (8.7)                                                      | -                                                                           | Mean (SD)<br>29.1 (5.7) | - |
| Villanego 2021 <sup>78</sup>                            | 91                                        | Median (IQR)<br>Responder<br>59 (50–64.5)<br>Non-responder<br>62.5 (58–70.5) | Median (IQR)<br>Responder<br>8 (3.4–15.6)<br>Non-responder<br>2.3 (1.5–9.2) | -                       | - |
| Werbel 2021 <sup>79</sup>                               | 30                                        | Median (IQR)<br>57 (44-62)                                                   | Median (IQR)<br>4.5 (2.3-10.5)                                              | -                       | - |
| Wijtvliet 2021 <sup>81</sup>                            | 94<br>BNT162b2<br>(1 <sup>st</sup> dose)  | Median (IQR)<br>56.5 (46.0-66.8)                                             | -                                                                           | -                       | - |
|                                                         | 44<br>mRNA-1273<br>(1 <sup>st</sup> dose) | Median (IQR)<br>54 (48.8-61.0)                                               | -                                                                           | -                       | - |
|                                                         | 91<br>BNT162b2<br>(2 <sup>nd</sup> dose)  | Median (IQR)<br>57 (56.5-66.5)                                               | -                                                                           | -                       | - |
|                                                         | 42<br>mRNA-1273<br>(2 <sup>nd</sup> dose) | Median (IQR)<br>55.5 (50.0-61.0)                                             | -                                                                           | -                       | - |
| Yi 2021 <sup>82</sup>                                   | 145                                       | -                                                                            | Median (IQR)<br>5 (3-10)                                                    | -                       | - |

IQR: interquartile range; SD: standard deviation ; BMI: body mass index; SE: standard error

eFigure 1. Forest Plots of Studied Risk Factors

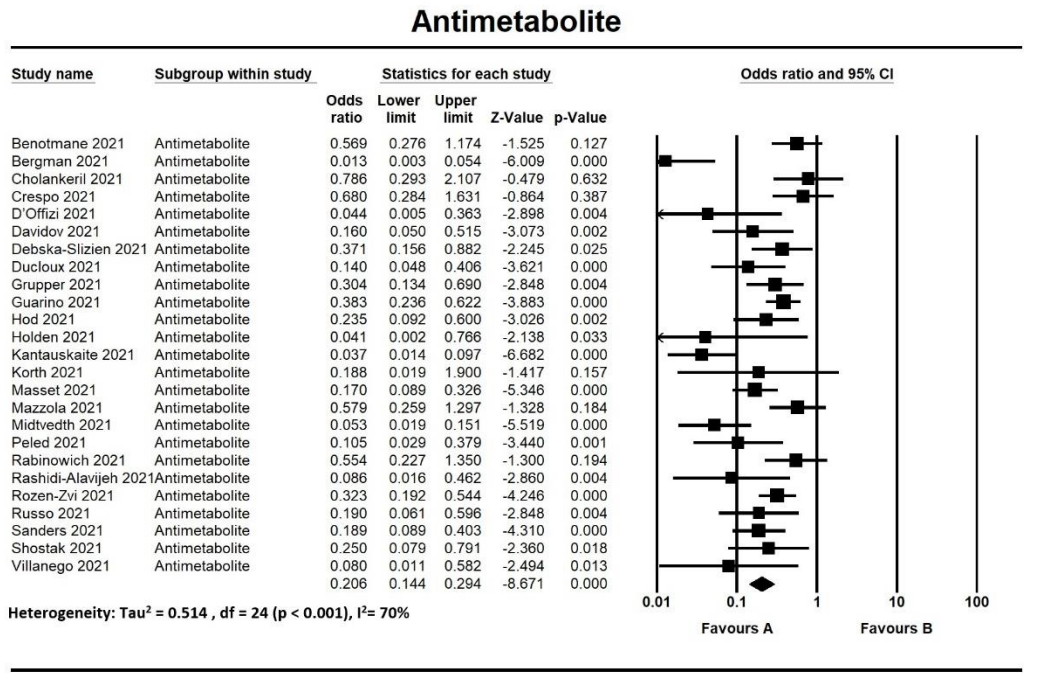

Meta Analysis

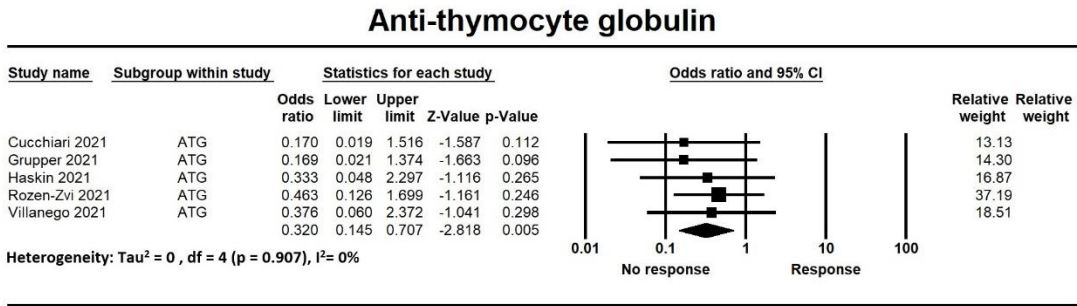

Meta Analysis

CI: confidence interval; ATG: anti-thymocyte globulin



## Calcineurin inhibitor

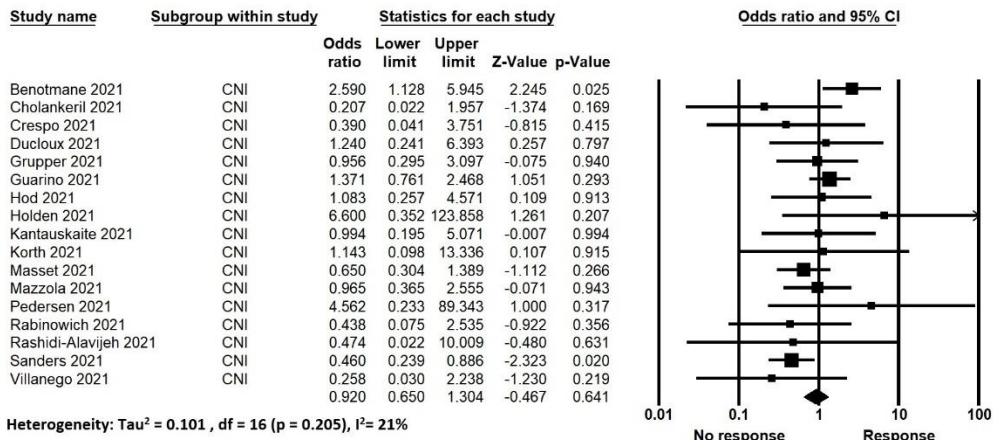

### Meta Analysis

## Deceased donor

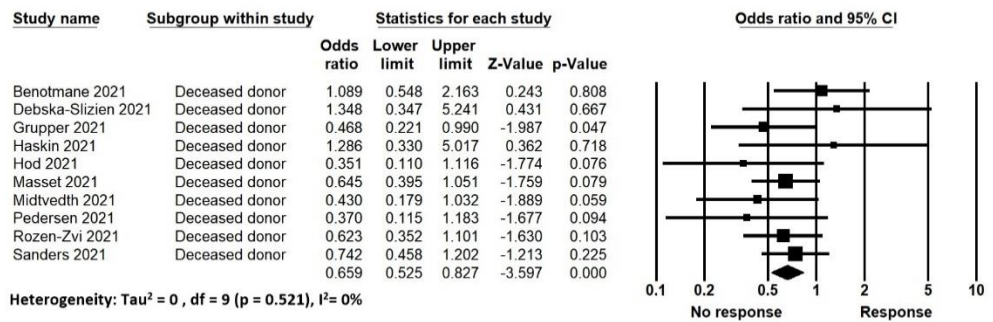

### Meta Analysis

CI: confidence interval;

## Male

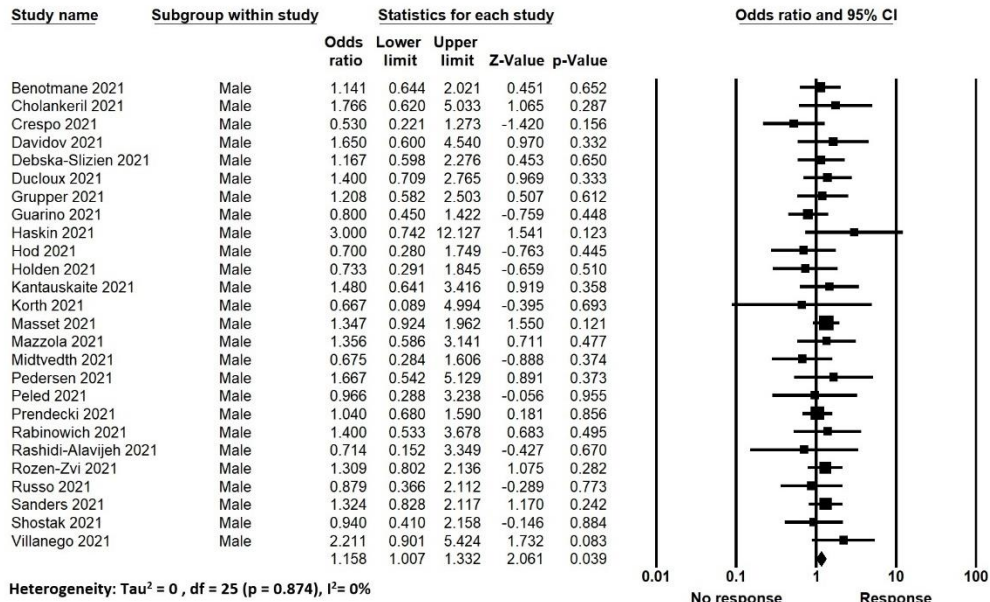

### Meta Analysis

## mTOR inhibitor

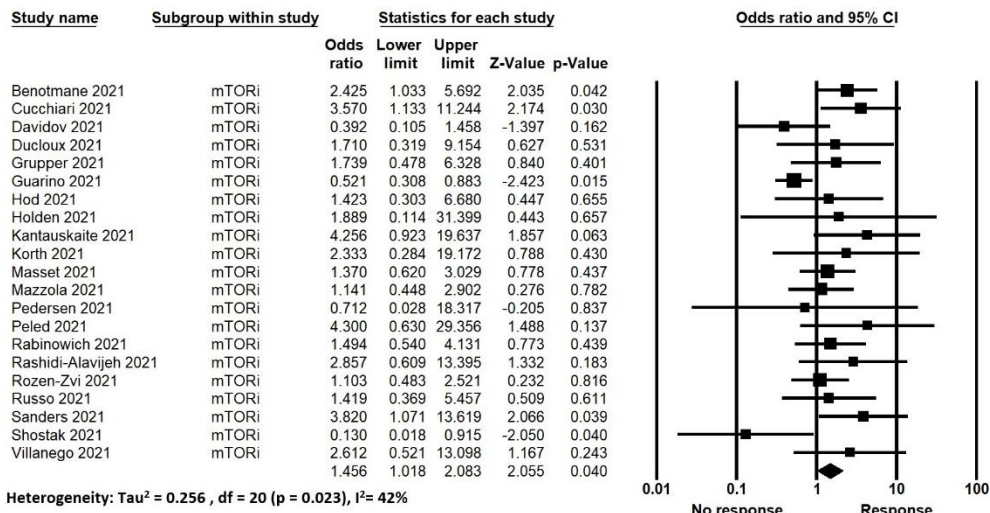

### Meta Analysis

CI: confidence interval; mTORi: mTOR inhibitor

## Rituximab

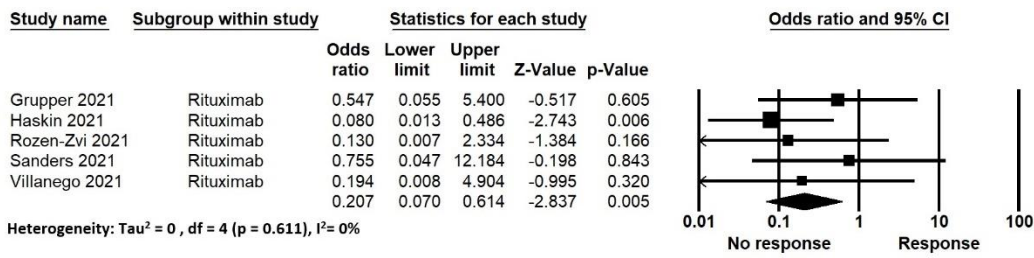

### Meta Analysis

## Age

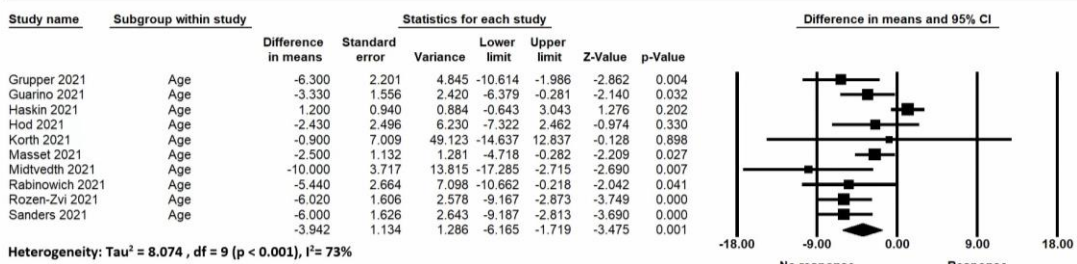

### Meta Analysis

CI: confidence interval;

## Body Mass Index

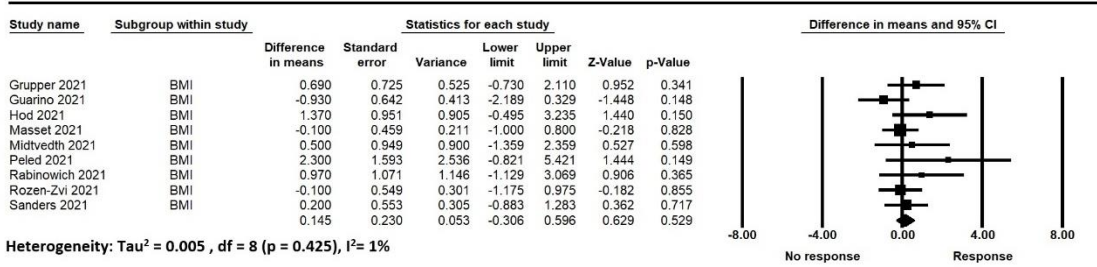

### Meta Analysis

## Lymphocyte count

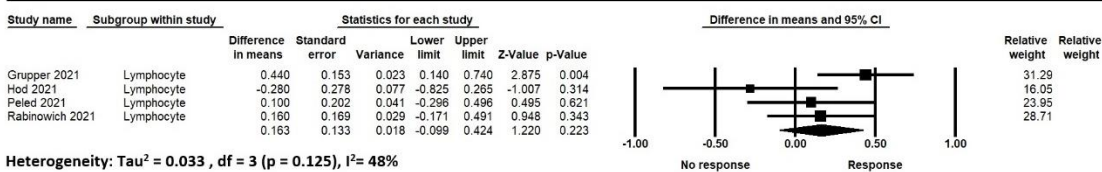

### Meta Analysis

## Duration after transplantation

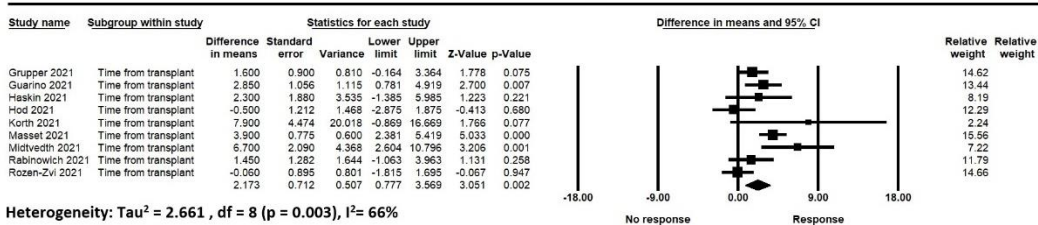

### Meta Analysis

CI: confidence interval; BMI: body mass index

**eFigure 2. Sensitivity Analysis of Studied Risk Factors**

### Antimetabolite sensitivity

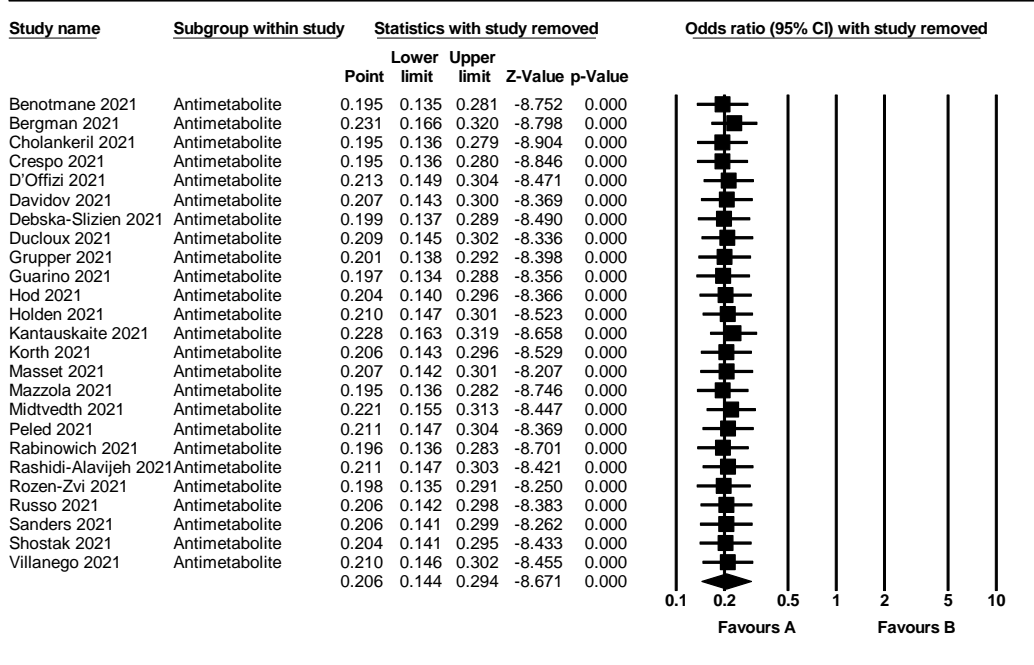

Meta Analysis

### Anti-thymocyte globulin sensitivity analysis

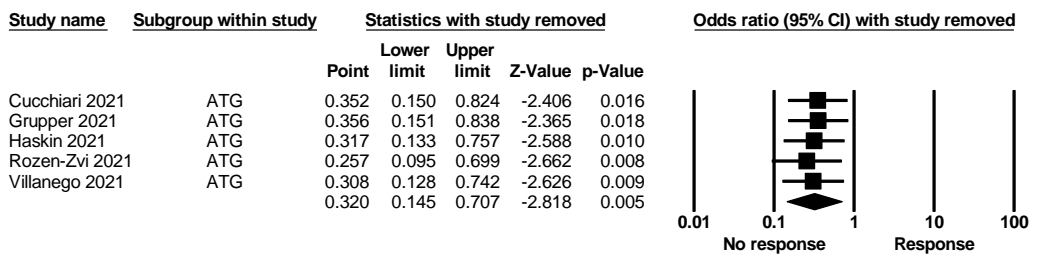

Meta Analysis

CI: confidence interval; ATG: anti-thymocyte globulin

## Calcineurin inhibitor sensitivity analysis

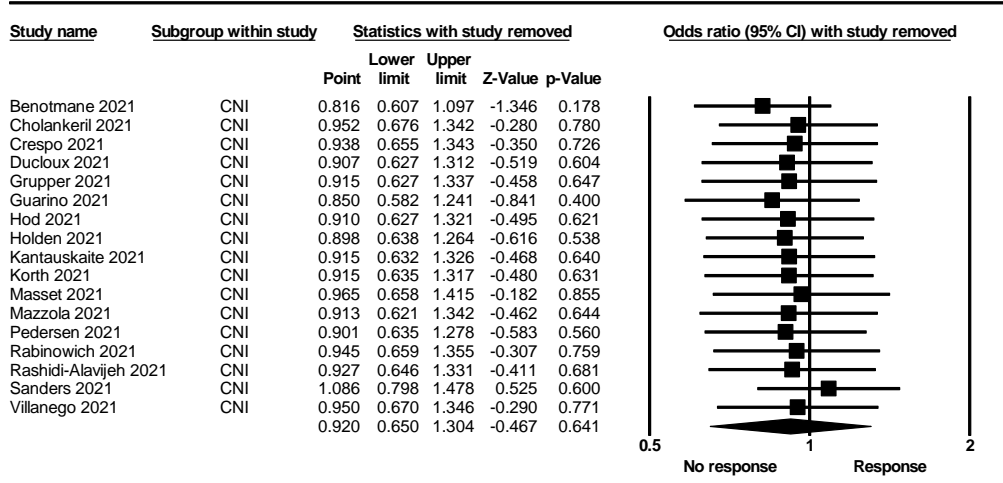

### Meta Analysis

## Deceased donor sensitivity analysis

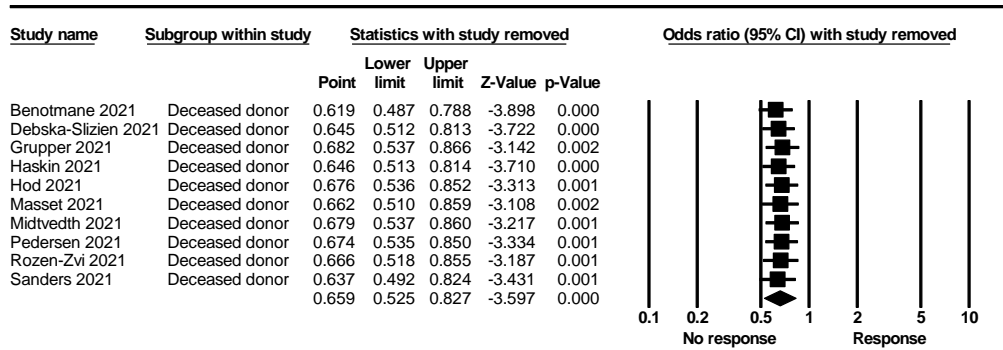

### Meta Analysis

CI: confidence interval; CNI: calcineurin inhibitor

## Male sensitivity analysis

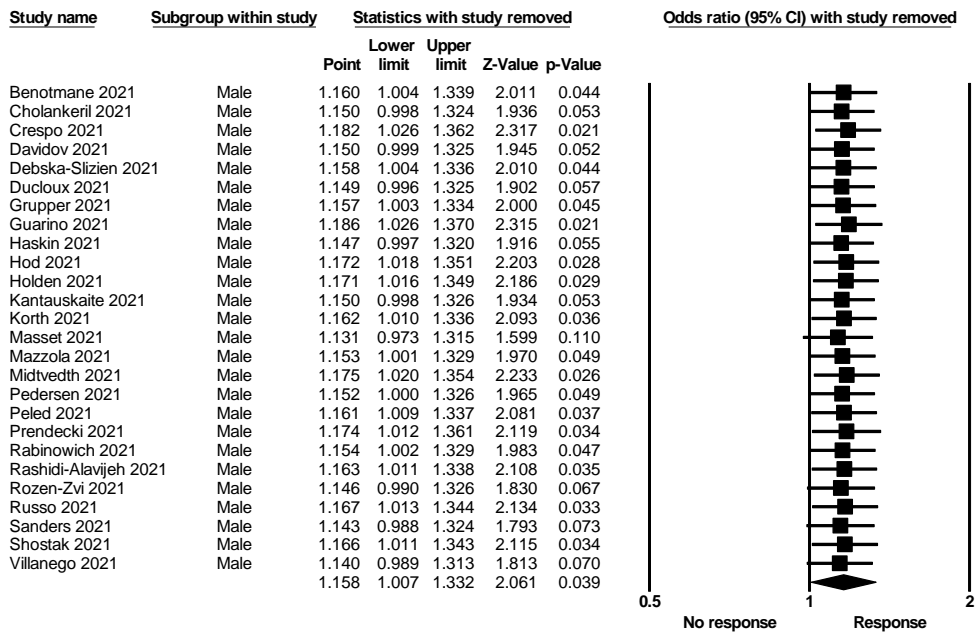

### Meta Analysis

## mTOR inhibitor sensitivity analysis

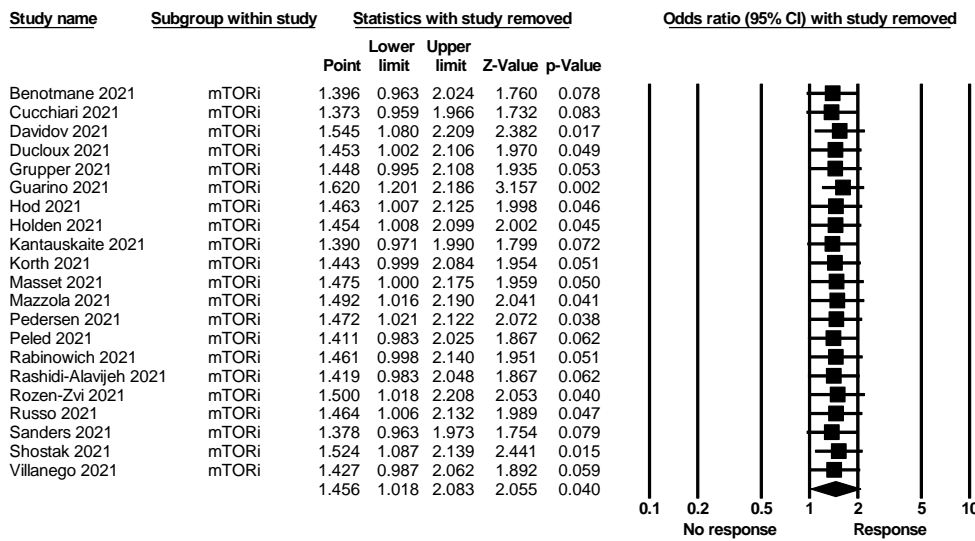

### Meta Analysis

CI: confidence interval; mTORi: mTOR inhibitor

## Rituximab sensitivity analysis

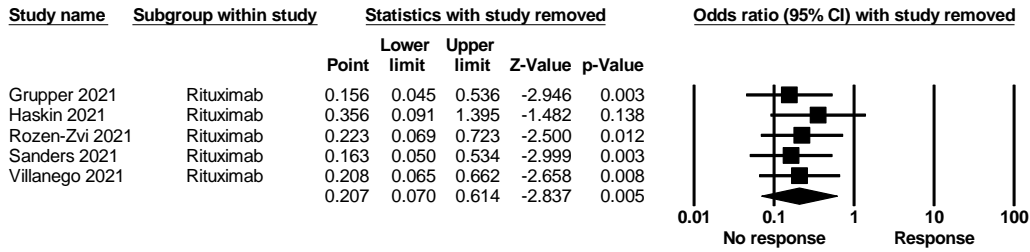

### Meta Analysis

## Body Mass Index sensitivity analysis

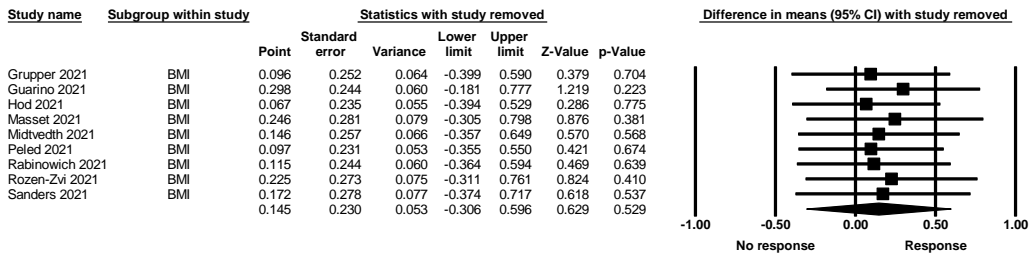

### Meta Analysis

## Age sensitivity analysis

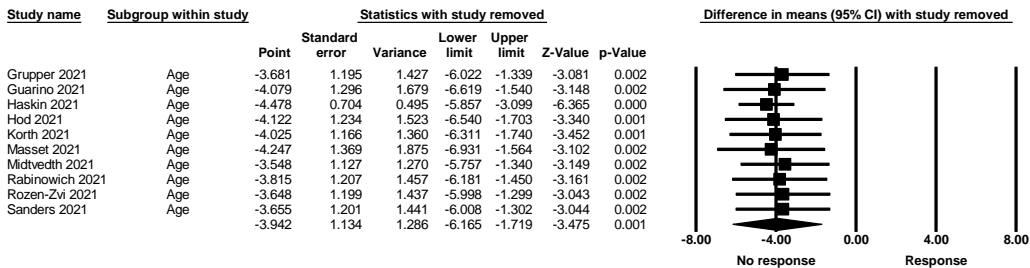

### Meta Analysis

CI: confidence interval; BMI: body mass index



## Lymphocyte count sensitivity analysis

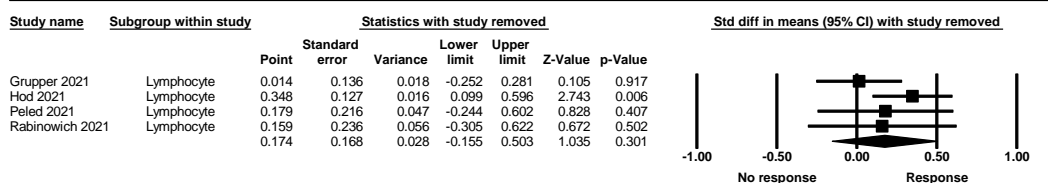

### Meta Analysis

## Duration after transplantation sensitivity analysis

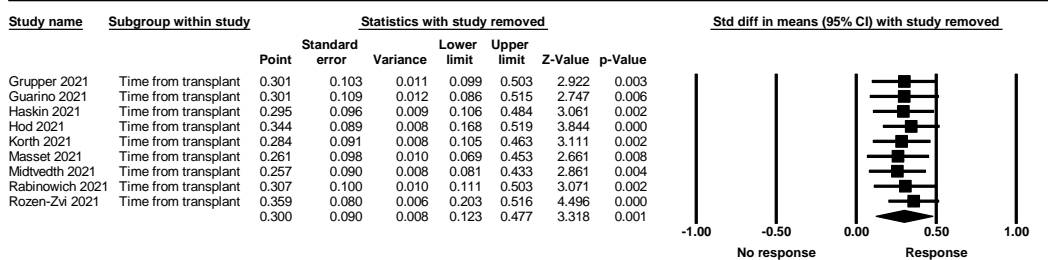

### Meta Analysis

CI: confidence interval

**eFigure 3.** Publication Bias of Studied Risk Factors

**Antimetabolite**

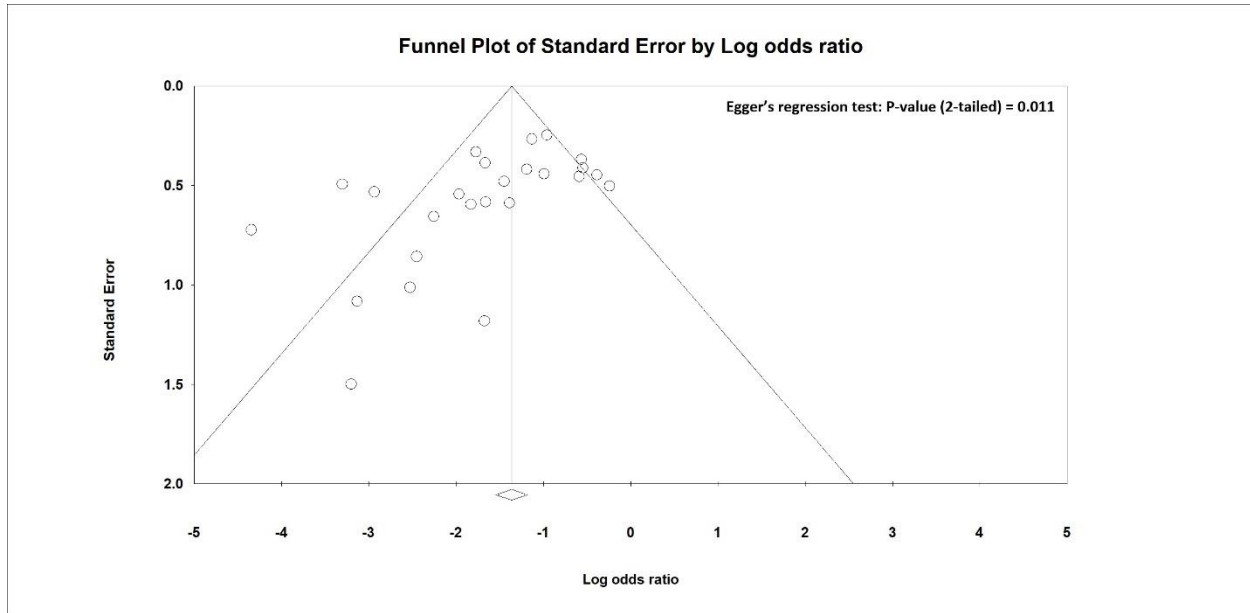

**Anti-thymocyte globulin**

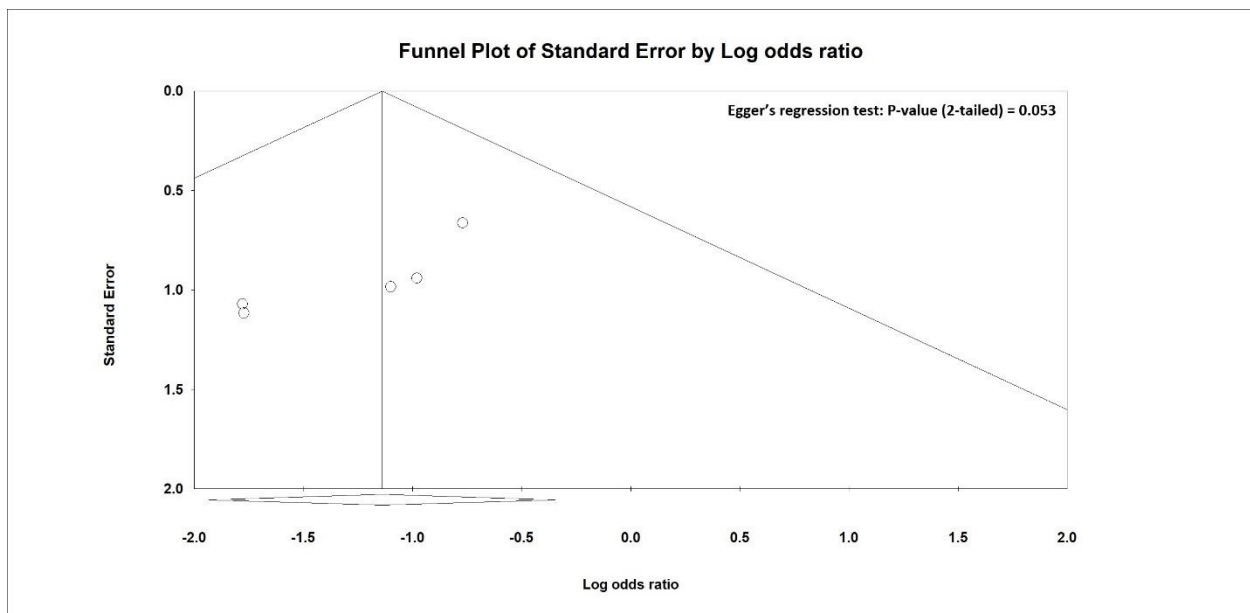

## Calcineurin inhibitor

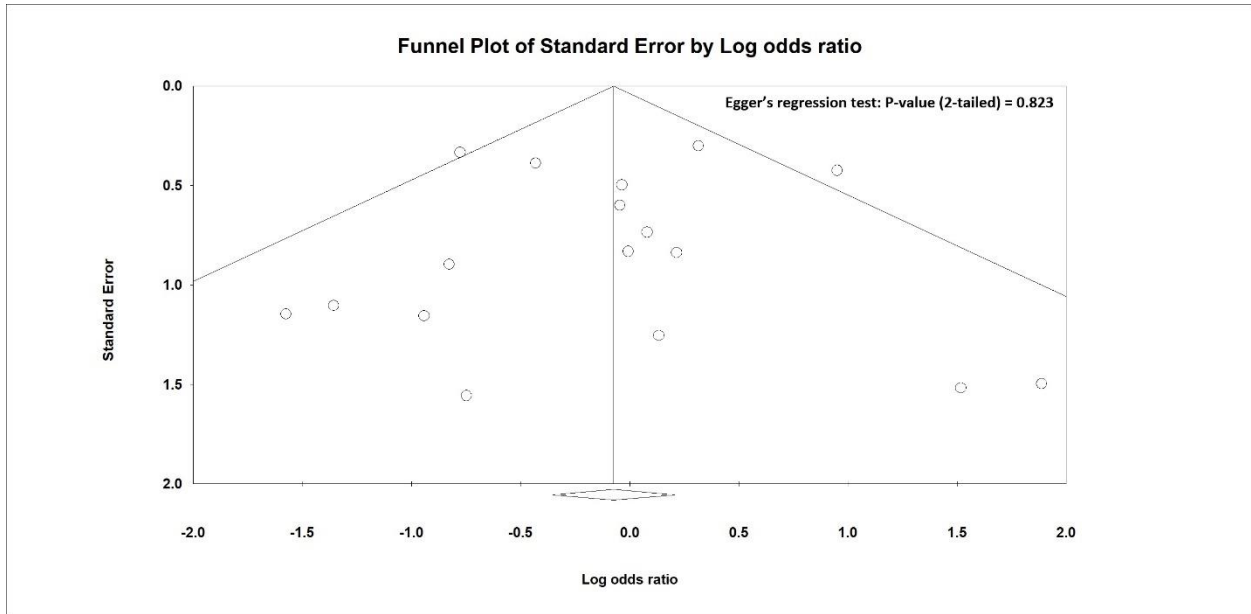

## Deceased donor

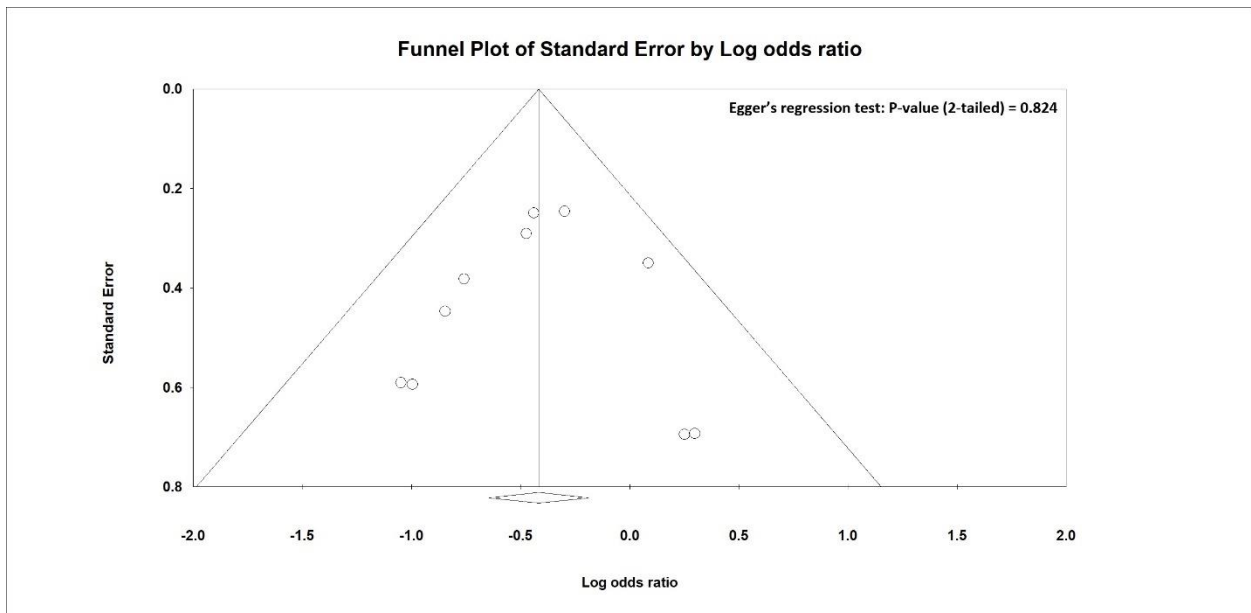

## Male

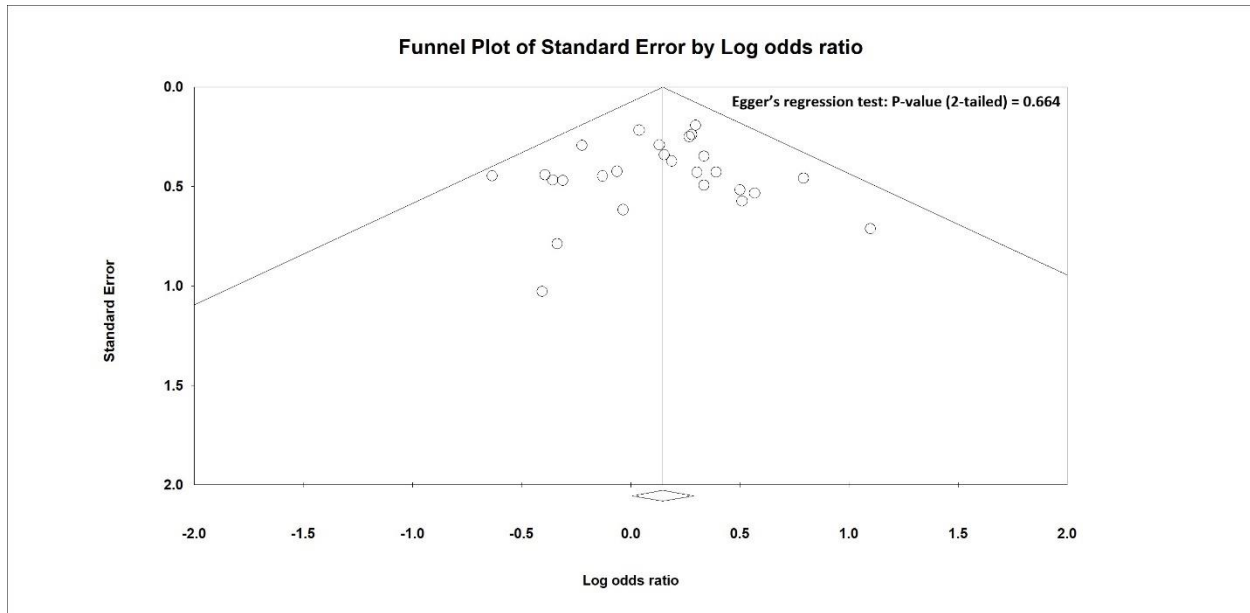

## mTOR inhibitor

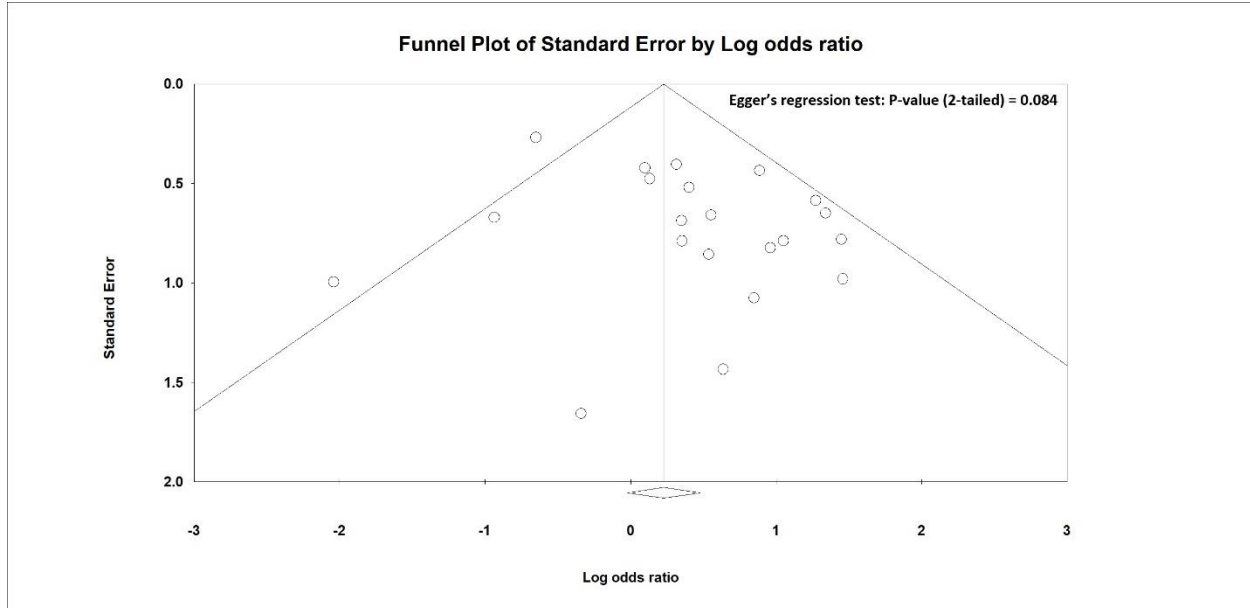

## Rituximab

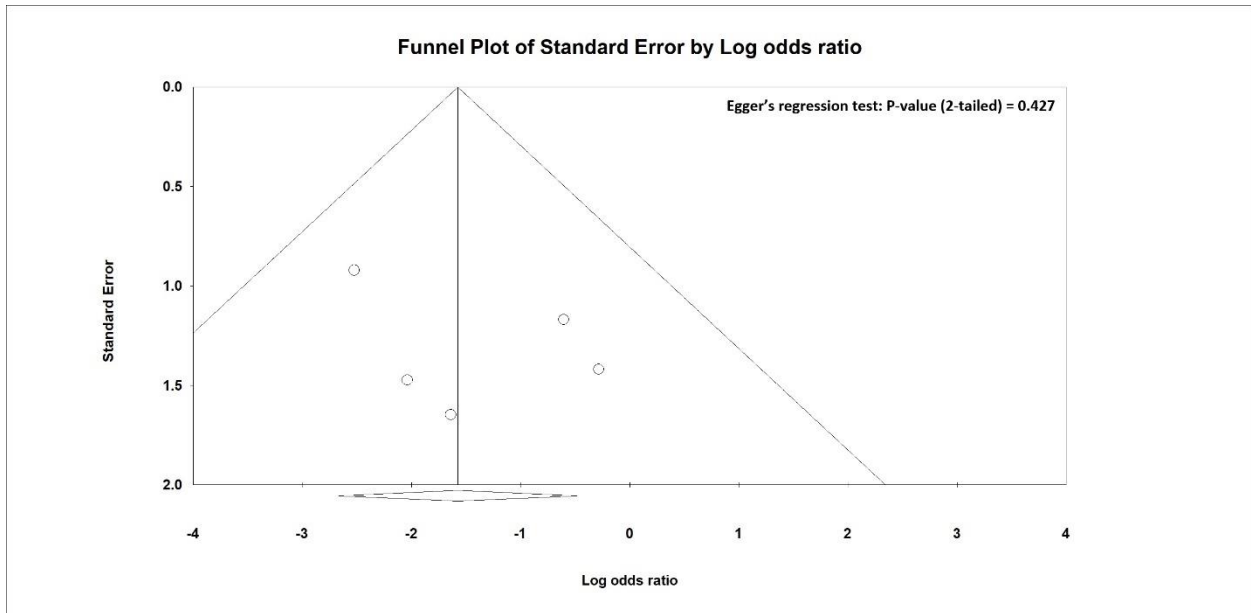

## Age

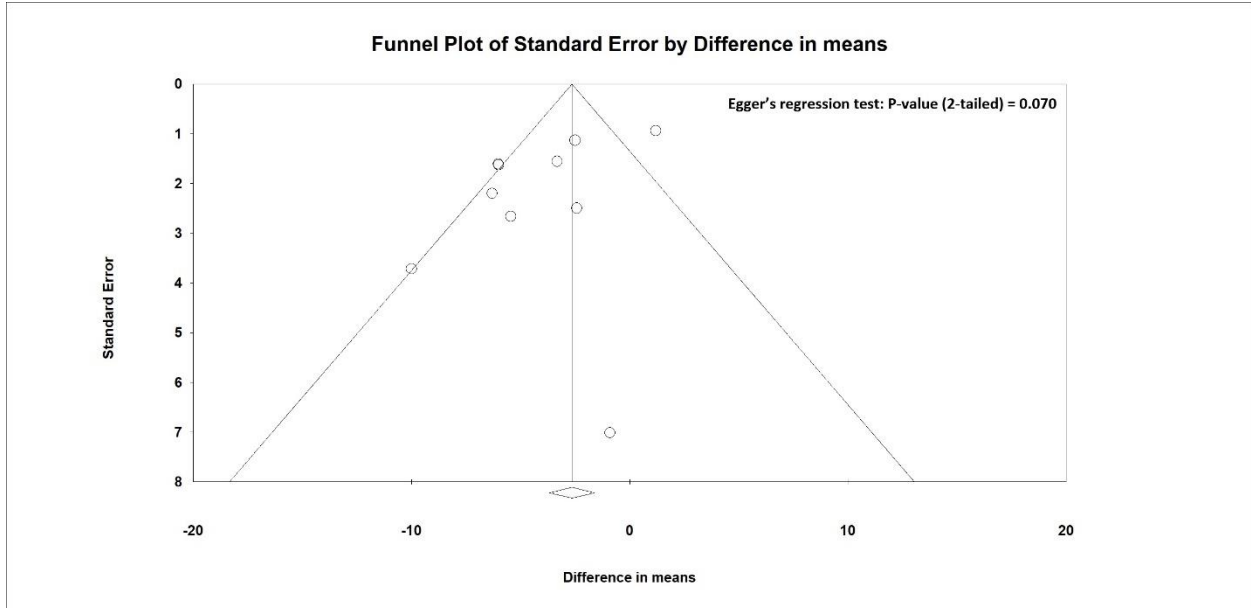

## BMI

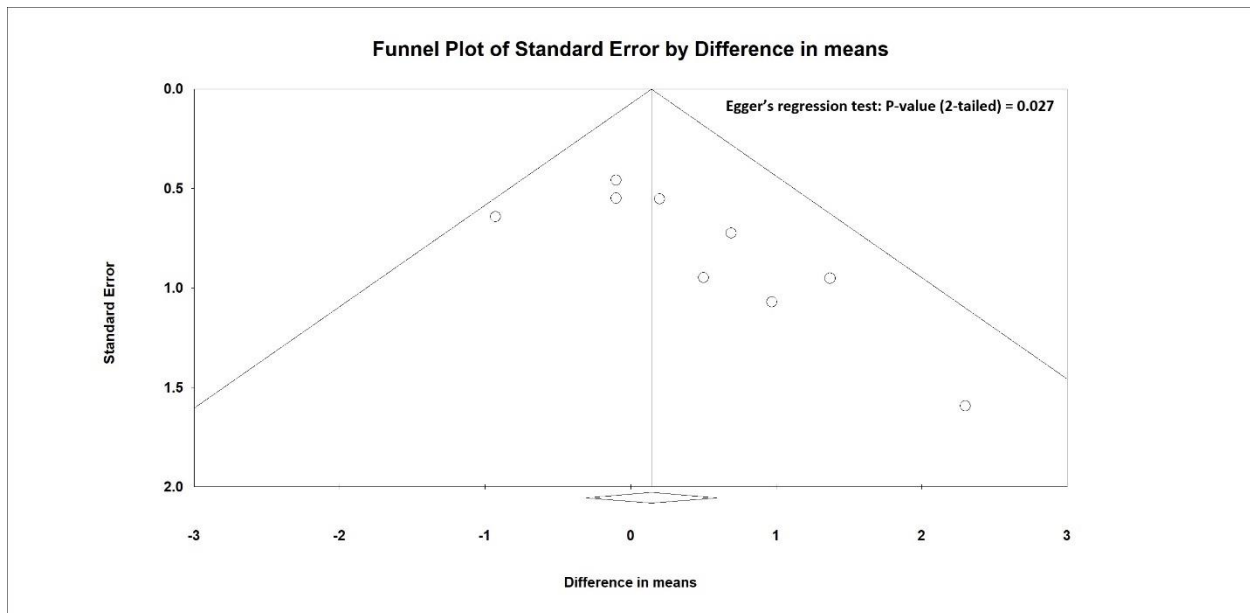

## Lymphocyte count

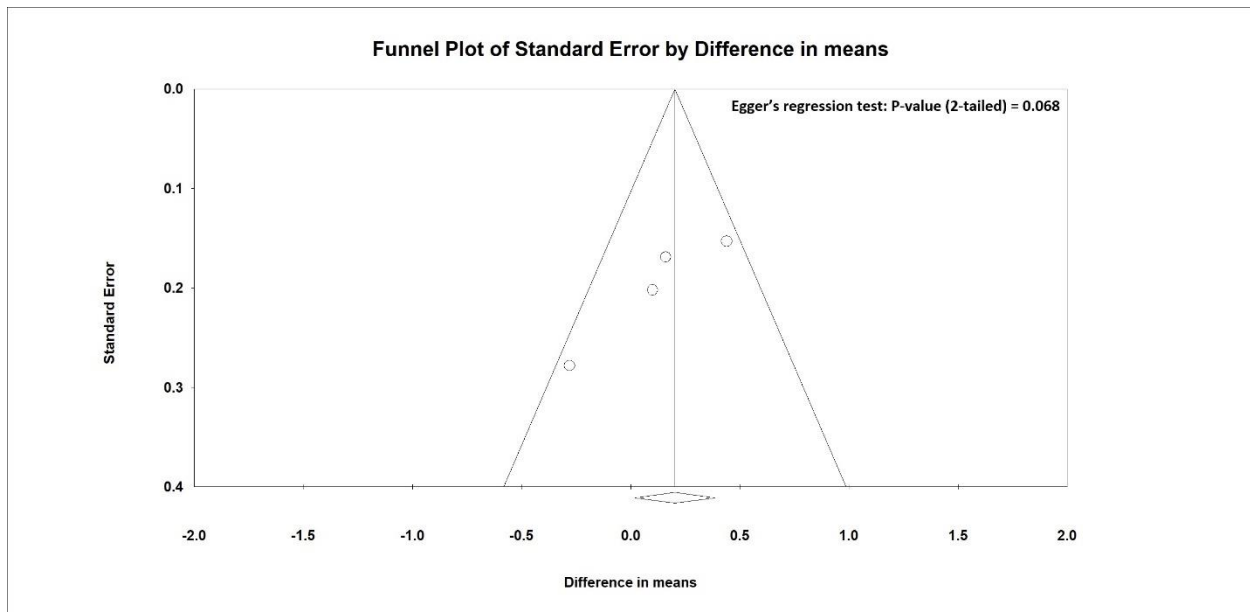

## Duration after transplantation

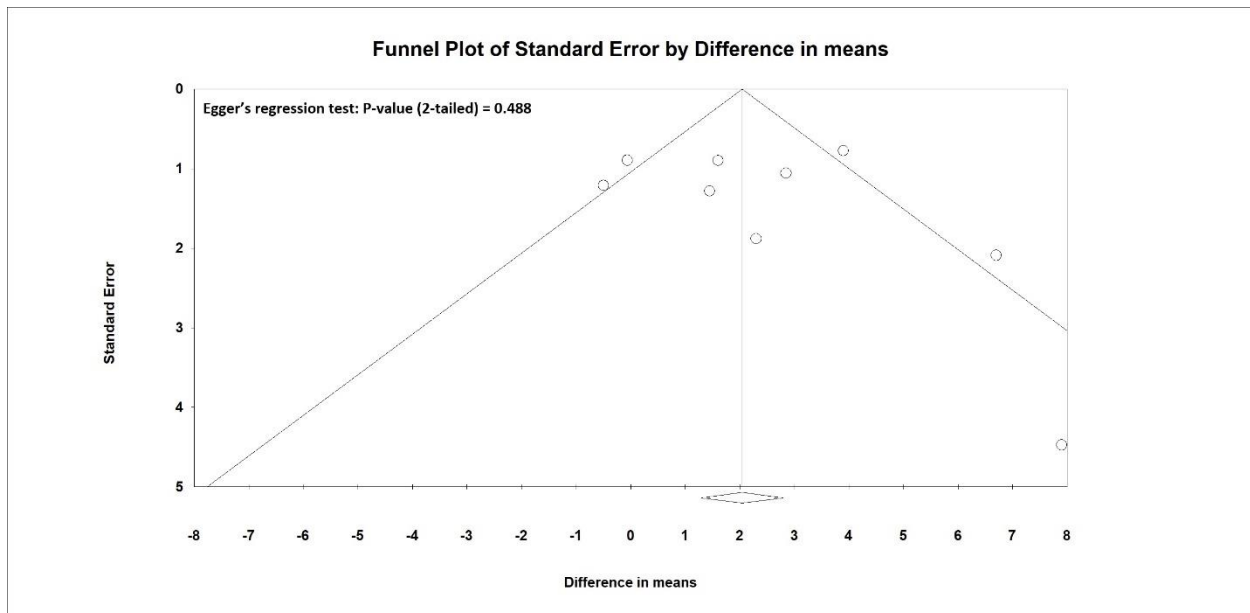

**eFigure 4.** Funnel Plots and Adjusted Effect Estimates Accounting for Publication Bias  
**Antimetabolite**

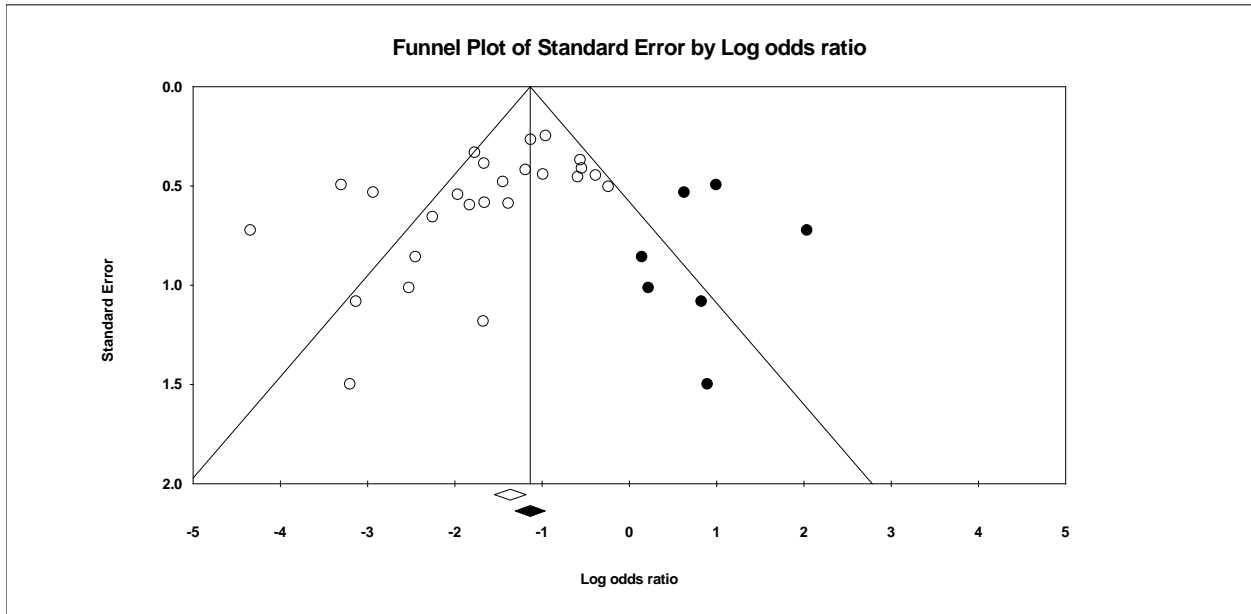

**Anti-thymocyte globulin**

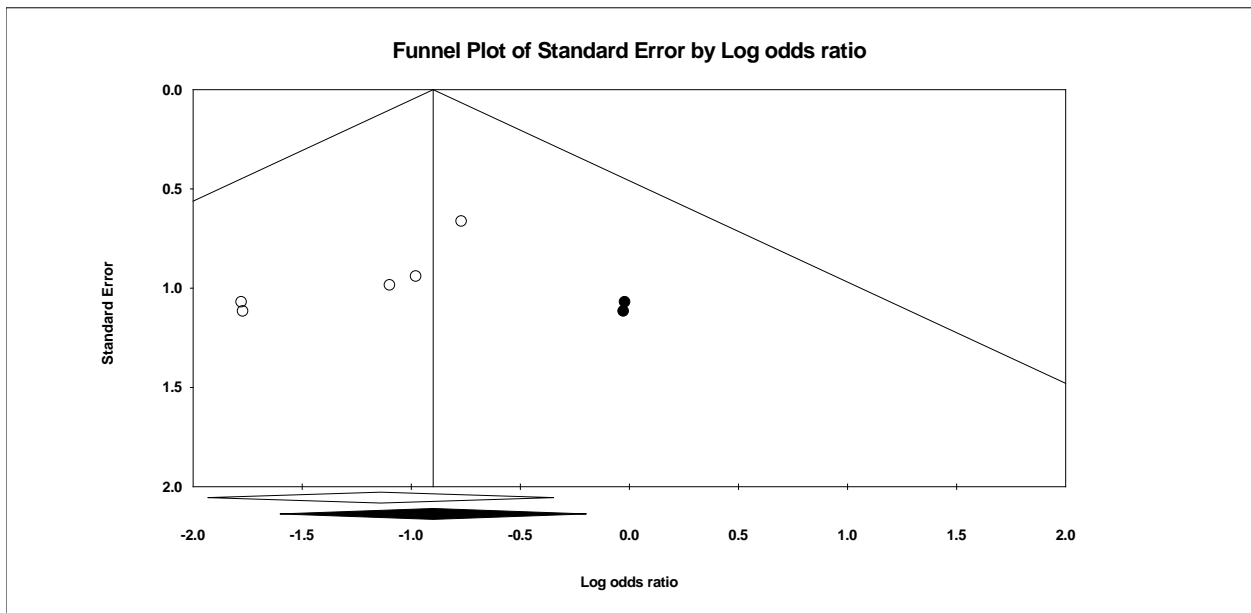



## mTOR inhibitor

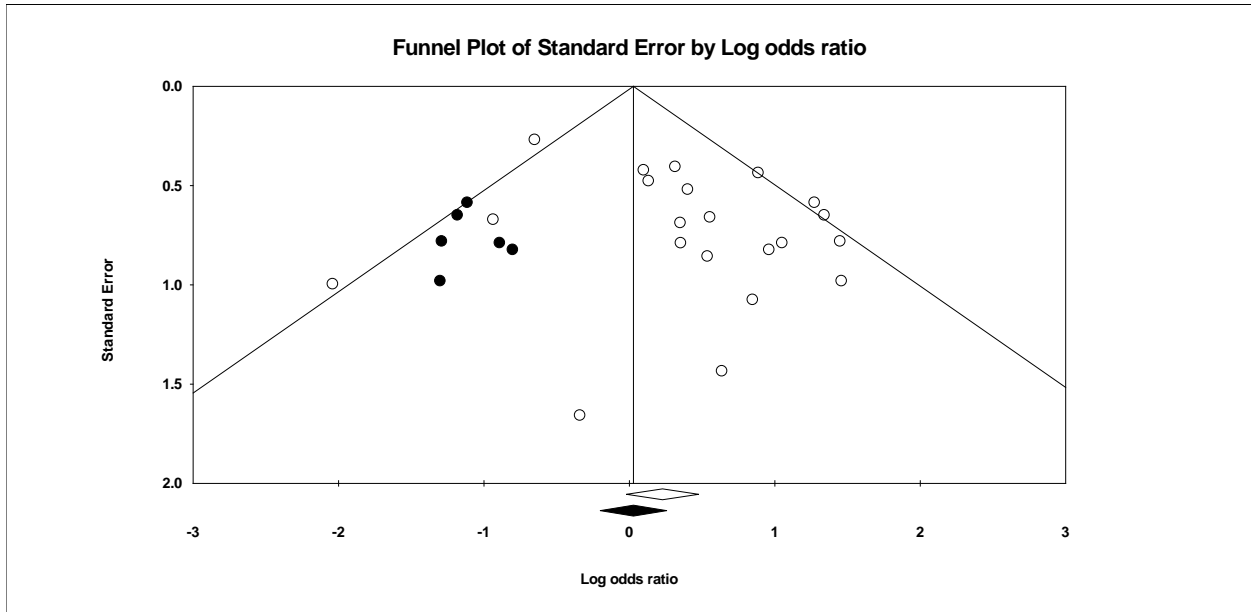

## BMI

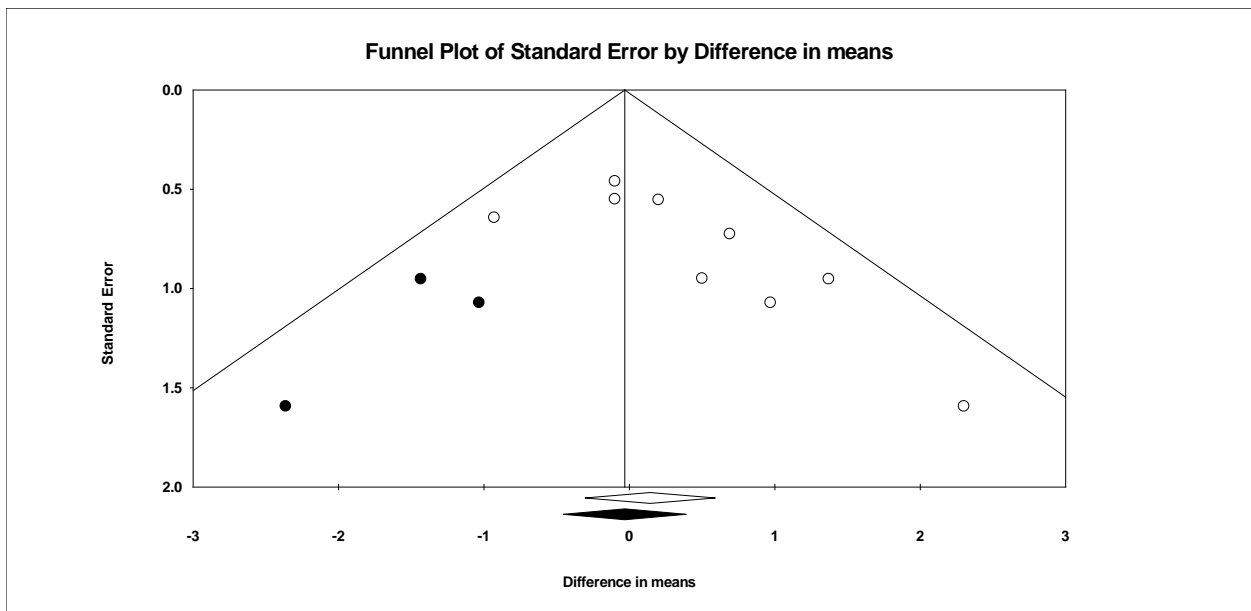

## Lymphocyte count

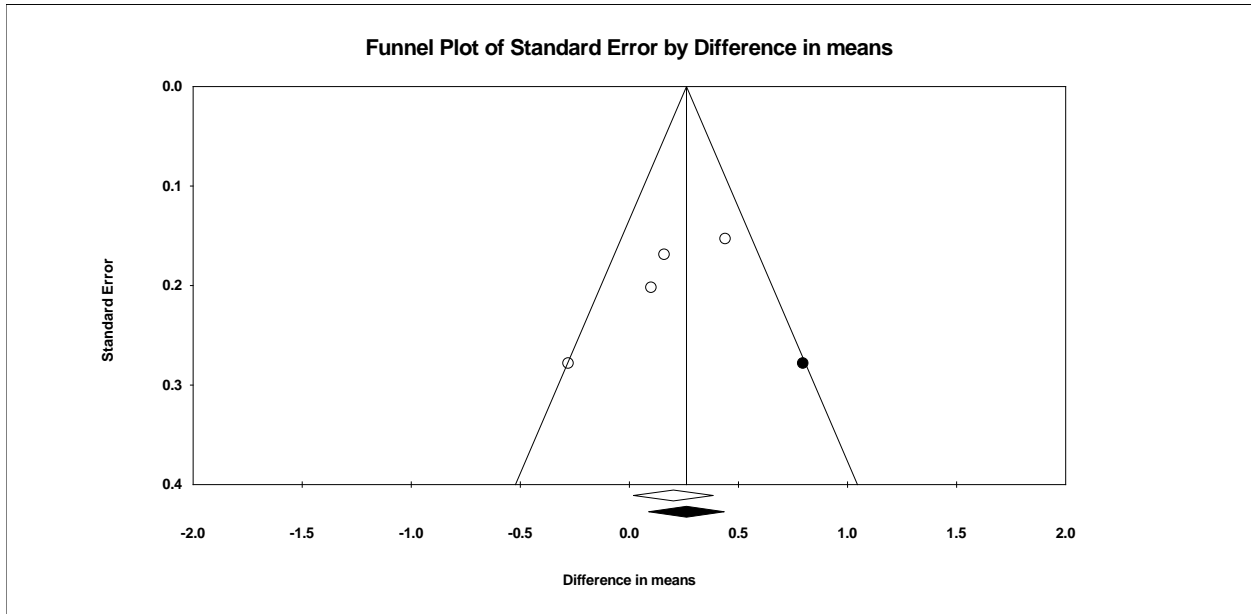

## Duration after transplantation

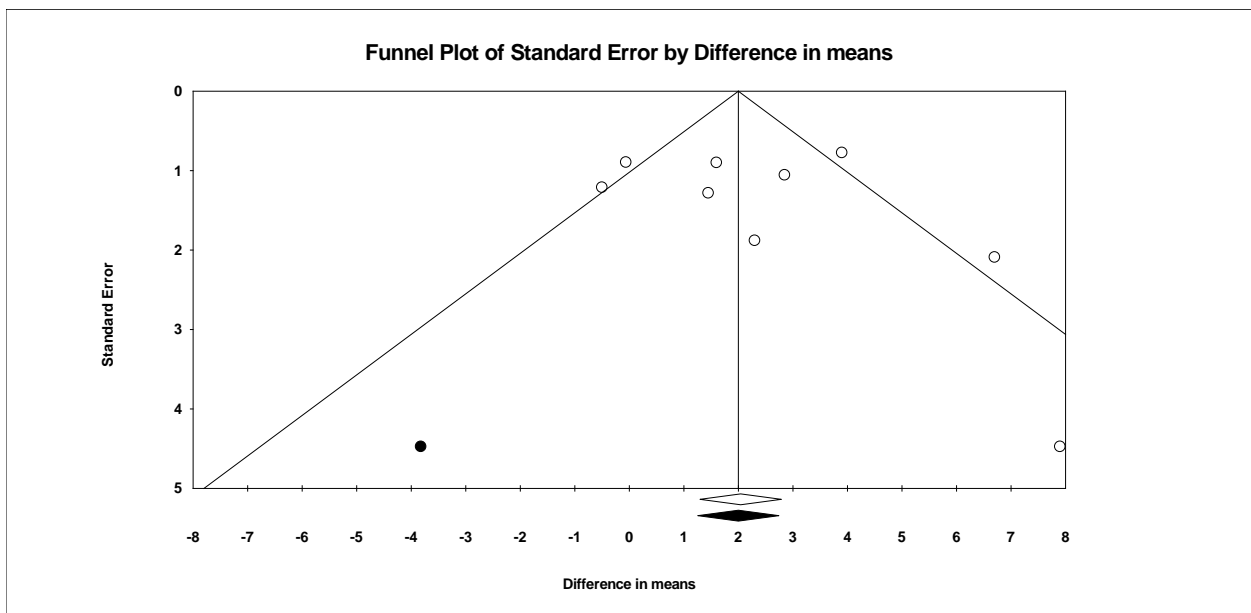

## eReferences

1. Alejo JL, Mitchell J, Chiang TPY, et al. Antibody Response to a Fourth Dose of a SARS-CoV-2 Vaccine in Solid Organ Transplant Recipients: A Case Series. *Transplantation*. 2021;(wej, 0132144). doi:10.1097/TP.0000000000003934
2. Azzi Y, Raees H, Wang T, et al. Risk factors associated with poor response to COVID-19 vaccination in kidney transplant recipients. *Kidney Int*. Published online September 3, 2021:S0085-2538(21)00826-7. doi:10.1016/j.kint.2021.08.019
3. Itzhaki Ben Zadok O, Shaul AA, Ben-Avraham B, et al. Immunogenicity of the BNT162b2 mRNA vaccine in heart transplant recipients - a prospective cohort study. *European journal of heart failure*. 2021;(dr4, 100887595). doi:10.1002/ejhf.2199
4. Benotmane I, Gautier-Vargas G, Cognard N, et al. Weak anti-SARS-CoV-2 antibody response after the first injection of an mRNA COVID-19 vaccine in kidney transplant recipients. *KIDNEY INTERNATIONAL*. 2021;99(6):1487-1489. doi:10.1016/j.kint.2021.03.014
5. Benotmane I, Gautier-Vargas G, Cognard N, et al. Low immunization rates among kidney transplant recipients who received 2 doses of the mRNA-1273 SARS-CoV-2 vaccine. *Kidney international*. 2021;99(6):1498-1500. doi:10.1016/j.kint.2021.04.005
6. Benotmane I, Gautier G, Perrin P, et al. Antibody Response After a Third Dose of the mRNA-1273 SARS-CoV-2 Vaccine in Kidney Transplant Recipients With Minimal Serologic Response to 2 Doses. *JAMA-JOURNAL OF THE AMERICAN MEDICAL ASSOCIATION*. doi:10.1001/jama.2021.12339
7. Bergman P, Blennow O, Hansson L, et al. Safety and efficacy of the mRNA BNT162b2 vaccine against SARS-CoV-2 in five groups of immunocompromised patients and healthy controls in a prospective open-label clinical trial. *EBioMedicine*. 2021;74. doi:10.1016/j.ebiom.2021.103705
8. Bertrand D, Hamzaoui M, Lemee V, et al. Antibody and T Cell Response to SARS-CoV-2 Messenger RNA BNT162b2 Vaccine in Kidney Transplant Recipients and Hemodialysis Patients. *Journal of the American Society of Nephrology : JASN*. 2021;32(9):2147-2152. doi:10.1681/ASN.2021040480
9. Bertrand D, Hanoy M, Edet S, et al. Antibody response to SARS-CoV-2 mRNA BNT162b2 vaccine in kidney transplant recipients and in-centre and satellite centre haemodialysis patients. *Clinical kidney journal*. 2021;14(9):2127-2128. doi:10.1093/ckj/sfab100
10. Bertrand D, Hamzaoui M, Lemée V, et al. Antibody and T cell response to a third dose of SARS-CoV-2 messenger RNA BNT162b2 vaccine in kidney transplant recipients. *Kidney Int*. Published online October 4, 2021:S0085-2538(21)00924-8. doi:10.1016/j.kint.2021.09.014

11. Boyarsky BJ, Werbel WA, Avery RK, et al. Immunogenicity of a Single Dose of SARS-CoV-2 Messenger RNA Vaccine in Solid Organ Transplant Recipients. *JAMA-JOURNAL OF THE AMERICAN MEDICAL ASSOCIATION*. 2021;325(17):1784-1786. doi:10.1001/jama.2021.4385
12. Boyarsky BJ, Werbel WA, Avery RK, et al. Antibody Response to 2-Dose SARS-CoV-2 mRNA Vaccine Series in Solid Organ Transplant Recipients. *JAMA-JOURNAL OF THE AMERICAN MEDICAL ASSOCIATION*. 2021;325(21):2204-2206. doi:10.1001/jama.2021.7489
13. Boyarsky BJ, Chiang TPY, Ou MT, et al. Antibody Response to the Janssen COVID-19 Vaccine in Solid Organ Transplant Recipients. *TRANSPLANTATION*. 2021;105(8):E82-E83. doi:10.1097/TP.0000000000003850
14. Cao J, Liu X, Muthukumar A, Gagan J, Jones P, Zu Y. Poor Humoral Response in Solid Organ Transplant Recipients following Complete mRNA SARS-CoV-2 Vaccination. *Clinical chemistry*. 2021;(dbz, 9421549). doi:10.1093/clinchem/hvab149
15. Chavarot N, Ouedrani A, Marion O, et al. Poor Anti-SARS-CoV-2 Humoral and T-cell Responses After 2 Injections of mRNA Vaccine in Kidney Transplant Recipients Treated With Belatacept. *TRANSPLANTATION*. 2021;105(9):E94-E95. doi:10.1097/TP.0000000000003784
16. Chavarot N, Morel A, Leruez-Ville M, et al. Weak antibody response to three doses of mRNA vaccine in kidney transplant recipients treated with belatacept. *AMERICAN JOURNAL OF TRANSPLANTATION*. doi:10.1111/ajt.16814
17. Crespo M, Barrilado-Jackson A, Padilla E, et al. Negative immune responses to two-dose mRNA COVID-19 vaccines in renal allograft recipients assessed with simple antibody and interferon gamma release assay cellular monitoring. *Am J Transplant*. Published online September 22, 2021. doi:10.1111/ajt.16854
18. Cucchiari D, Egri N, Bodro M, et al. Cellular and humoral response after MRNA-1273 SARS-CoV-2 vaccine in kidney transplant recipients. *American journal of transplantation : official journal of the American Society of Transplantation and the American Society of Transplant Surgeons*. 2021;21(8):2727-2739. doi:10.1111/ajt.16701
19. D'Offizi G, Agrati C, Visco-Comandini U, et al. Coordinated cellular and humoral immune responses after two-dose SARS-CoV2 mRNA vaccination in liver transplant recipients. *Liver International*. n/a(n/a). doi:10.1111/liv.15089
20. Danthu C, Hantz S, Dahlem A, et al. Humoral Response after SARS-CoV-2 mRNA Vaccination in a Cohort of Hemodialysis Patients and Kidney Transplant Recipients. *Journal of the American Society of Nephrology : JASN*. 2021;32(9):2153-2158. doi:10.1681/ASN.2021040490

21. Davidov Y, Tsaraf K, Cohen-Ezra O, et al. Immunogenicity and Adverse Effects of the 2-Dose BNT162b2 Messenger RNA Vaccine Among Liver Transplantation Recipients. *Liver Transplantation*. n/a(n/a). doi:10.1002/lt.26366
22. Dębska-Ślizień A, Ślizień Z, Muchlado M, et al. Predictors of Humoral Response to mRNA COVID19 Vaccines in Kidney Transplant Recipients: A Longitudinal Study—The COViNEPH Project. *Vaccines*. 2021;9(10):1165. doi:10.3390/vaccines9101165
23. Del Bello A, Abravanel F, Marion O, et al. Efficiency of a boost with a third dose of anti-SARS-CoV-2 messenger RNA-based vaccines in solid organ transplant recipients. *AMERICAN JOURNAL OF TRANSPLANTATION*. doi:10.1111/ajt.16775
24. Ducloux D, Colladant M, Chabannes M, Bamoulid J, Courivaud C. Factors associated with humoral response after BNT162b2 mRNA COVID-19 vaccination in kidney transplant patients. *Clinical Kidney Journal*. 2021;14(10):2270-2272. doi:10.1093/ckj/sfab125
25. Firket L, Descy J, Seidel L, et al. Serological response to mRNA SARS-CoV-2 BNT162b2 vaccine in kidney transplant recipients depends on prior exposure to SARS-CoV-2. *American journal of transplantation : official journal of the American Society of Transplantation and the American Society of Transplant Surgeons*. 2021;(100968638). doi:10.1111/ajt.16726
26. Georgery H, Devresse A, Yombi JC, et al. Very low Immunization Rate in Kidney Transplant Recipients after one Dose of the BNT162b2 Vaccine: Beware not to Lower the Guard!. *Transplantation*. 2021;(wej, 0132144). doi:10.1097/TP.0000000000003818
27. Georgery H, Devresse A, Yombi JC, et al. Disappointing Immunization Rate After 2 Doses of the BNT162b2 Vaccine in a Belgian Cohort of Kidney Transplant Recipients. *Transplantation*. 2021;(wej, 0132144). doi:10.1097/TP.0000000000003861
28. Grupper A, Rabinowich L, Schwartz D, et al. Reduced humoral response to mRNA SARS-CoV-2 BNT162b2 vaccine in kidney transplant recipients without prior exposure to the virus. *American journal of transplantation : official journal of the American Society of Transplantation and the American Society of Transplant Surgeons*. 2021;21(8):2719-2726. doi:10.1111/ajt.16615
29. Guarino M, Cossiga V, Esposito I, Alessandro F, Morisco F. Effectiveness of SARS-Cov-2 vaccination in liver transplanted patients: the debate is open!. *Journal of hepatology*. 2021;(ibs, 8503886). doi:10.1016/j.jhep.2021.07.034
30. Hall VG, Ferreira VH, Ierullo M, et al. Humoral and cellular immune response and safety of two-dose SARS-CoV-2 mRNA-1273 vaccine in solid organ transplant recipients. *American journal of transplantation : official journal of the American Society of Transplantation and the American Society of Transplant Surgeons*. 2021;(100968638). doi:10.1111/ajt.16766

31. Hall V, Ferreira V, Ku T, et al. Randomized Trial of a Third Dose of mRNA-1273 Vaccine in Transplant Recipients. *NEW ENGLAND JOURNAL OF MEDICINE*. 2021;385(13):1244-1246. doi:10.1056/NEJMc2111462
32. Haskin O, Ashkenazi-Hoffnung L, Ziv N, et al. Serological Response to the BNT162b2 COVID-19 mRNA Vaccine in Adolescent and Young Adult Kidney Transplant Recipients. *Transplantation*. 2021;(wej, 0132144). doi:10.1097/TP.0000000000003922
33. Havlin J, Svorcova M, Dvorackova E, et al. Immunogenicity of BNT162b2 mRNA COVID-19 vaccine and SARS-CoV-2 infection in lung transplant recipients. *The Journal of heart and lung transplantation : the official publication of the International Society for Heart Transplantation*. 2021;40(8):754-758. doi:10.1016/j.healun.2021.05.004
34. Havlin J, Skotnicova A, Dvorackova E, et al. Impaired Humoral Response to Third Dose of BNT162b2 mRNA COVID-19 Vaccine Despite Detectable Spike Protein-specific T cells in Lung Transplant Recipients. *Transplantation*. Published online December 17, 2021. doi:10.1097/TP.0000000000004021
35. Herrera S, Colmenero J, Pascal M, et al. Cellular and humoral immune response after mRNA-1273 SARS-CoV-2 vaccine in liver and heart transplant recipients. *American journal of transplantation : official journal of the American Society of Transplantation and the American Society of Transplant Surgeons*. 2021;(100968638). doi:10.1111/ajt.16768
36. Hod T, Ben-David A, Olmer L, et al. Humoral Response of Renal Transplant Recipients to the BNT162b2 SARS-CoV-2 mRNA Vaccine Using Both RBD IgG and Neutralizing Antibodies. *Transplantation*. 2021;(wej, 0132144). doi:10.1097/TP.0000000000003889
37. Hoffman TW, Meek B, Rijkers GT, van Kessel DA. Poor Serologic Response to 2 Doses of an mRNA-based SARS-CoV-2 Vaccine in Lung Transplant Recipients. *Transplantation*. 2022;106(1):e103. doi:10.1097/TP.0000000000003966
38. Holden IK, Bistrup C, Nilsson AC, et al. Immunogenicity of SARS-CoV-2 mRNA vaccine in solid organ transplant recipients. *Journal of internal medicine*. 2021;(i2g, 8904841). doi:10.1111/joim.13361
39. Kamar N, Abravanel F, Marion O, Couat C, Izopet J, Del Bello A. Three Doses of an mRNA Covid-19 Vaccine in Solid-Organ Transplant Recipients. *The New England journal of medicine*. 2021;385(7):661-662. doi:10.1056/NEJMc2108861
40. Kamar N, Abravanel F, Marion O, et al. Assessment of 4 Doses of SARS-CoV-2 Messenger RNA-Based Vaccine in Recipients of a Solid Organ Transplant. *JAMA Network Open*. 2021;4(11):e2136030. doi:10.1001/jamanetworkopen.2021.36030
41. Kantauskaite M, Müller L, Kolb T, et al. Intensity of mycophenolate mofetil treatment is associated with an impaired immune response to SARS-CoV-2 vaccination in kidney

- transplant recipients. *Am J Transplant*. Published online September 22, 2021. doi:10.1111/ajt.16851
42. Korth J, Jahn M, Dorsch O, et al. Impaired Humoral Response in Renal Transplant Recipients to SARS-CoV-2 Vaccination with BNT162b2 (Pfizer-BioNTech). *Viruses*. 2021;13(5). doi:10.3390/v13050756
  43. Kumar D, Ferreira VH, Hall VG, et al. Neutralization of SARS-CoV-2 Variants in Transplant Recipients After Two and Three Doses of mRNA-1273 Vaccine. *Ann Intern Med*. Published online November 23, 2021. doi:10.7326/M21-3480
  44. Marinaki S, Adamopoulos S, Degiannis D, et al. Immunogenicity of SARS-CoV-2 BNT162b2 vaccine in solid organ transplant recipients. *American journal of transplantation : official journal of the American Society of Transplantation and the American Society of Transplant Surgeons*. 2021;21(8):2913-2915. doi:10.1111/ajt.16607
  45. Marion O, Del Bello A, Abravanel F, et al. Safety and Immunogenicity of Anti-SARS-CoV-2 Messenger RNA Vaccines in Recipients of Solid Organ Transplants. *Annals of internal medicine*. 2021;(0372351). doi:10.7326/M21-1341
  46. Massa F, Cremoni M, Gérard A, et al. Safety and cross-variant immunogenicity of a three-dose COVID-19 mRNA vaccine regimen in kidney transplant recipients. *EBioMedicine*. 2021;73:103679. doi:10.1016/j.ebiom.2021.103679
  47. Masset C, Kerleau C, Garandeau C, et al. A third injection of BNT162b2 mRNA Covid-19 vaccine in kidney transplant recipients improves the humoral immune response. *Kidney international*. 2021;(kvb, 0323470). doi:10.1016/j.kint.2021.08.017
  48. Masset C, Ville S, Garandeau C, et al. Observations on improving COVID-19 vaccination responses in kidney transplant recipients: heterologous vaccination and immunosuppression modulation. *Kidney International*. Published online December 8, 2021. doi:10.1016/j.kint.2021.11.024
  49. Mazzola A, Todesco E, Drouin S, et al. Poor Antibody Response after Two Doses of SARS-CoV-2 vaccine in Transplant Recipients. *Clinical infectious diseases : an official publication of the Infectious Diseases Society of America*. 2021;(a4j, 9203213). doi:10.1093/cid/ciab580
  50. Medina-Pestana J, Cristelli MP, Viana LA, et al. Clinical Impact, Reactogenicity, and Immunogenicity After the First CoronaVac Dose in Kidney Transplant Recipients. *Transplantation*. 2021;(wej, 0132144). doi:10.1097/TP.0000000000003901
  51. Middleton RJ, Gorton J, O'Riordan E, Knight S, Kalra PA, Poulidakos D. Impact of Shielding and First Dose of COVID-19 Vaccination in Kidney Transplant Recipients. *NEPHRON*. doi:10.1159/000518631

52. Midtvedt K, Tran T, Parker K, et al. Low Immunization Rate in Kidney Transplant Recipients Also After Dose 2 of the BNT162b2 Vaccine: Continue to Keep Your Guard up! *TRANSPLANTATION*. 2021;105(8):E80-E81. doi:10.1097/TP.0000000000003856
53. Miele M, Busa R, Russelli G, et al. Impaired anti-SARS-CoV-2 humoral and cellular immune response induced by Pfizer-BioNTech BNT162b2 mRNA vaccine in solid organ transplanted patients. *American journal of transplantation : official journal of the American Society of Transplantation and the American Society of Transplant Surgeons*. 2021;21(8):2919-2921. doi:10.1111/ajt.16702
54. Narasimhan M, Mahimainathan L, Clark AE, et al. Serological Response in Lung Transplant Recipients after Two Doses of SARS-CoV-2 mRNA Vaccines. *Vaccines*. 2021;9(7). doi:10.3390/vaccines9070708
55. Noble J, Langello A, Bouchut W, Lupo J, Lombardo D, Rostaing L. Immune Response Post-SARS-CoV-2 mRNA Vaccination in Kidney-Transplant Recipients Receiving Belatacept. *Transplantation*. 2021;(wej, 0132144). doi:10.1097/TP.0000000000003923
56. Pedersen RM, Bang LL, Tornby DS, et al. The SARS-CoV-2-neutralizing capacity of kidney transplant recipients 4 weeks after receiving a second dose of the BNT162b2 vaccine. *Kidney Int*. Published online September 20, 2021:S0085-2538(21)00866-8. doi:10.1016/j.kint.2021.09.006
57. Peled Y, Ram E, Lavee J, et al. BNT162b2 vaccination in heart transplant recipients: Clinical experience and antibody response. *The Journal of heart and lung transplantation : the official publication of the International Society for Heart Transplantation*. 2021;40(8):759-762. doi:10.1016/j.healun.2021.04.003
58. Peled Y, Ram E, Lavee J, et al. Third dose of the BNT162b2 vaccine in heart transplant recipients: Immunogenicity and clinical experience. *J Heart Lung Transplant*. Published online August 28, 2021:S1053-2498(21)02481-5. doi:10.1016/j.healun.2021.08.010
59. Prendecki M, Thomson T, Clarke CL, et al. Immunological responses to SARS-CoV-2 vaccines in kidney transplant recipients. *Lancet*. Published online October 4, 2021:S0140-6736(21)02096-1. doi:10.1016/S0140-6736(21)02096-1
60. Quiroga B, Soler MJ, Ortiz A, et al. Safety and immediate humoral response of COVID-19 vaccines in chronic kidney disease patients: the SENCOVAC study. *Nephrology Dialysis Transplantation*. Published online November 12, 2021:gfab313. doi:10.1093/ndt/gfab313
61. Rabinowich L, Grupper A, Baruch R, et al. Low immunogenicity to SARS-CoV-2 vaccination among liver transplant recipients. *Journal of hepatology*. 2021;75(2):435-438. doi:10.1016/j.jhep.2021.04.020



62. Rashidi-Alavijeh J, Frey A, Passenberg M, et al. Humoral Response to SARS-Cov-2 Vaccination in Liver Transplant Recipients-A Single-Center Experience. *Vaccines*. 2021;9(7). doi:10.3390/vaccines9070738
63. Rahav G, Lustig Y, Lavee J, et al. BNT162b2 mRNA COVID-19 vaccination in immunocompromised patients: A prospective cohort study. *EClinicalMedicine*. 2021;41:101158. doi:10.1016/j.eclinm.2021.101158
64. Rincon-Arevalo H, Choi M, Stefanski AL, et al. Impaired humoral immunity to SARS-CoV-2 BNT162b2 vaccine in kidney transplant recipients and dialysis patients. *Science immunology*. 2021;6(60). doi:10.1126/sciimmunol.abj1031
65. Rozen-Zvi B, Yahav D, Agur T, et al. Antibody response to SARS-CoV-2 mRNA vaccine among kidney transplant recipients: a prospective cohort study. *Clinical microbiology and infection : the official publication of the European Society of Clinical Microbiology and Infectious Diseases*. 2021;27(8):1173.e1-1173.e4. doi:10.1016/j.cmi.2021.04.028
66. Ruether DF, Schaub GM, Duengelhof PM, et al. SARS-CoV2-specific Humoral and T-cell Immune Response After Second Vaccination in Liver Cirrhosis and Transplant Patients. *Clin Gastroenterol Hepatol*. Published online September 9, 2021:S1542-3565(21)00967-8. doi:10.1016/j.cgh.2021.09.003
67. Russo G, Lai Q, Poli L, et al. SARS-COV-2 VACCINATION WITH BNT162B2 IN RENAL TRANSPLANT PATIENTS: RISK FACTORS FOR IMPAIRED RESPONSE AND IMMUNOLOGICAL IMPLICATIONS. *Clin Transplant*. Published online September 26, 2021:e14495. doi:10.1111/ctr.14495
68. Eren Sadioglu R, Demir E, Evren E, et al. Antibody response to two doses of inactivated SARS-CoV-2 vaccine (CoronaVac) in kidney transplant recipients. *Transpl Infect Dis*. Published online October 4, 2021:e13740. doi:10.1111/tid.13740
69. Sanders JSF, Bemelman FJ, Messchendorp AL, et al. The RECOVAC Immune-response Study: The Immunogenicity, Tolerability, and Safety of COVID-19 Vaccination in Patients With Chronic Kidney Disease, on Dialysis, or Living With a Kidney Transplant. *Transplantation*. Published online December 17, 2021. doi:10.1097/TP.0000000000003983
70. Sattler A, Schrezenmeier E, Weber UA, et al. Impaired humoral and cellular immunity after SARS-CoV-2 BNT162b2 (tozinameran) prime-boost vaccination in kidney transplant recipients. *The Journal of clinical investigation*. 2021;131(14). doi:10.1172/JCI150175
71. Schmidt T, Klemis V, Schub D, et al. Cellular immunity predominates over humoral immunity after homologous and heterologous mRNA and vector-based COVID-19 vaccine regimens in solid organ transplant recipients. *AMERICAN JOURNAL OF TRANSPLANTATION*. doi:10.1111/ajt.16818

72. Schramm R, Costard-Jackle A, Rivinius R, et al. Poor humoral and T-cell response to two-dose SARS-CoV-2 messenger RNA vaccine BNT162b2 in cardiothoracic transplant recipients. *Clinical research in cardiology : official journal of the German Cardiac Society*. 2021;110(8):1142-1149. doi:10.1007/s00392-021-01880-5
73. Schrezenmeier E, Rincon-Arevalo H, Stefanski AL, et al. B and T Cell Responses after a Third Dose of SARS-CoV-2 Vaccine in Kidney Transplant Recipients. *JASN*. 2021;32(12):3027-3033. doi:10.1681/ASN.2021070966
74. Shostak Y, Shafran N, Heching M, et al. Early humoral response among lung transplant recipients vaccinated with BNT162b2 vaccine. *The Lancet Respiratory medicine*. 2021;9(6):e52-e53. doi:10.1016/S2213-2600(21)00184-3
75. Stumpf J, Tonnus W, Paliege A, et al. Cellular And Humoral Immune Responses after Three Doses of BNT162b2 mRNA SARS-Cov-2 Vaccine in Kidney Transplant. *Transplantation*. 2021;(wej, 0132144). doi:10.1097/TP.0000000000003903
76. Stumpf J, Siepmann T, Lindner T, et al. Humoral and cellular immunity to SARS-CoV-2 vaccination in renal transplant versus dialysis patients: A prospective, multicenter observational study using mRNA-1273 or BNT162b2 mRNA vaccine. *The Lancet regional health Europe*. 2021;(101777707):100178. doi:10.1016/j.lanep.2021.100178
77. Thuluvath PJ, Robarts P, Chauhan M. Analysis of antibody responses after COVID-19 vaccination in liver transplant recipients and those with chronic liver diseases. *Journal of hepatology*. 2021;(ibs, 8503886). doi:10.1016/j.jhep.2021.08.008
78. Villanego F, Cazorla JM, Vigarra LA, et al. Protecting kidney transplant recipients against SARS-CoV-2 infection: A third dose of vaccine is necessary now. *AMERICAN JOURNAL OF TRANSPLANTATION*. doi:10.1111/ajt.16829
79. Werbel WA, Boyarsky BJ, Ou MT, et al. Safety and Immunogenicity of a Third Dose of SARS-CoV-2 Vaccine in Solid Organ Transplant Recipients: A Case Series. *Annals of internal medicine*. 2021;(0372351). doi:10.7326/L21-0282
80. Westhoff TH, Seibert FS, Anft M, et al. A third vaccine dose substantially improves humoral and cellular SARS-CoV-2 immunity in renal transplant recipients with primary humoral nonresponse. *Kidney Int*. Published online September 9, 2021. doi:10.1016/j.kint.2021.09.001
81. Wijtvliet VPWM, Ariën KK, Abrams S, et al. mRNA-1273 vaccine (Moderna): a better option than BNT162b2 (Pfizer) in kidney transplant recipients and dialysis patients? *Nephrology Dialysis Transplantation*. Published online December 9, 2021:gfab352. doi:10.1093/ndt/gfab352

82. Yi SG, Knight RJ, Graviss EA, et al. Kidney Transplant Recipients Rarely Show an Early Antibody Response Following the First COVID-19 Vaccine Administration. *Transplantation*. 2021;105(7):e72-e73. doi:10.1097/TP.0000000000003764
83. Cholankeril G, Al-Hillan A, Tarlow B, et al. Clinical Factors Associated With Lack of Serological Response to SARS-CoV-2 Messenger RNA Vaccine in Liver Transplantation Recipients. *Liver Transplantation*. 2022;28(1):123-126. doi:10.1002/lt.26351
